# Supplementary material for: DIAPH1 mediates progression of atherosclerosis and regulates hepatic lipid metabolism in mice
Source: PubMed Central journal article supplement (PMC10023694; doi:10.1038/s42003-023-04643-2), 2023-03-17
Supplement: 42003_2023_4643_MOESM1_ESM.pdf [file 42003_2023_4643_MOESM1_ESM.pdf]

## Supplementary Information

### DIAPH1 Mediates Progression of Atherosclerosis and Regulates Hepatic Lipid Metabolism in Mice

Laura Senatus<sup>1^</sup>, Lander Egaña-Gorroño<sup>1^</sup>, Raquel López-Díez<sup>1^</sup>, Sonia Bergaya<sup>2</sup>, Juan Francisco Aranda<sup>1</sup>, Jaume Amengual<sup>2</sup>, Lakshmi Arivazhagan<sup>1</sup>, Michael B. Manigrasso<sup>1</sup>, Gautham Yepuri<sup>1</sup>, Ramesh Nimma<sup>1</sup>, Kaamashri Mangar<sup>1</sup>, Rollanda Bernadin<sup>1</sup>, Boyan Zhou<sup>3</sup>, Paul F. Gugger<sup>1</sup>, Huilin Li<sup>3</sup>, Richard A. Friedman<sup>4</sup>, Neil D. Theise<sup>5</sup>, Alexander Shekhtman<sup>6</sup>, Edward A. Fisher<sup>2</sup>, Ravichandran Ramasamy<sup>1</sup>, Ann Marie Schmidt<sup>1\*</sup>

<sup>^</sup> These authors contributed equally

<sup>1</sup>Diabetes Research Program, Department of Medicine, New York University Grossman School of Medicine, NYU Langone Medical Center, New York, NY, USA; <sup>2</sup>The Leon H. Charney Division of Cardiology, Department of Medicine, The Marc and Ruti Bell Program in Vascular Biology, New York University Grossman School of Medicine, NYU Langone Medical Center, New York, NY, USA; <sup>3</sup>Departments of Population Health (Biostatistics) and Environmental Medicine, New York University Grossman School of Medicine, NYU Langone Medical Center, New York, NY, USA; <sup>4</sup>Biomedical Informatics Shared Resource, Herbert Irving Comprehensive Cancer Center and Department of Biomedical Informatics, Columbia University Irving Medical Center, New York, NY, USA; <sup>5</sup>Department of Pathology, New York University Grossman School of Medicine, NYU Langone Medical Center, New York, USA; <sup>6</sup>Department of Chemistry, The State University of New York at Albany, Albany, NY, USA

## Supplementary Figures

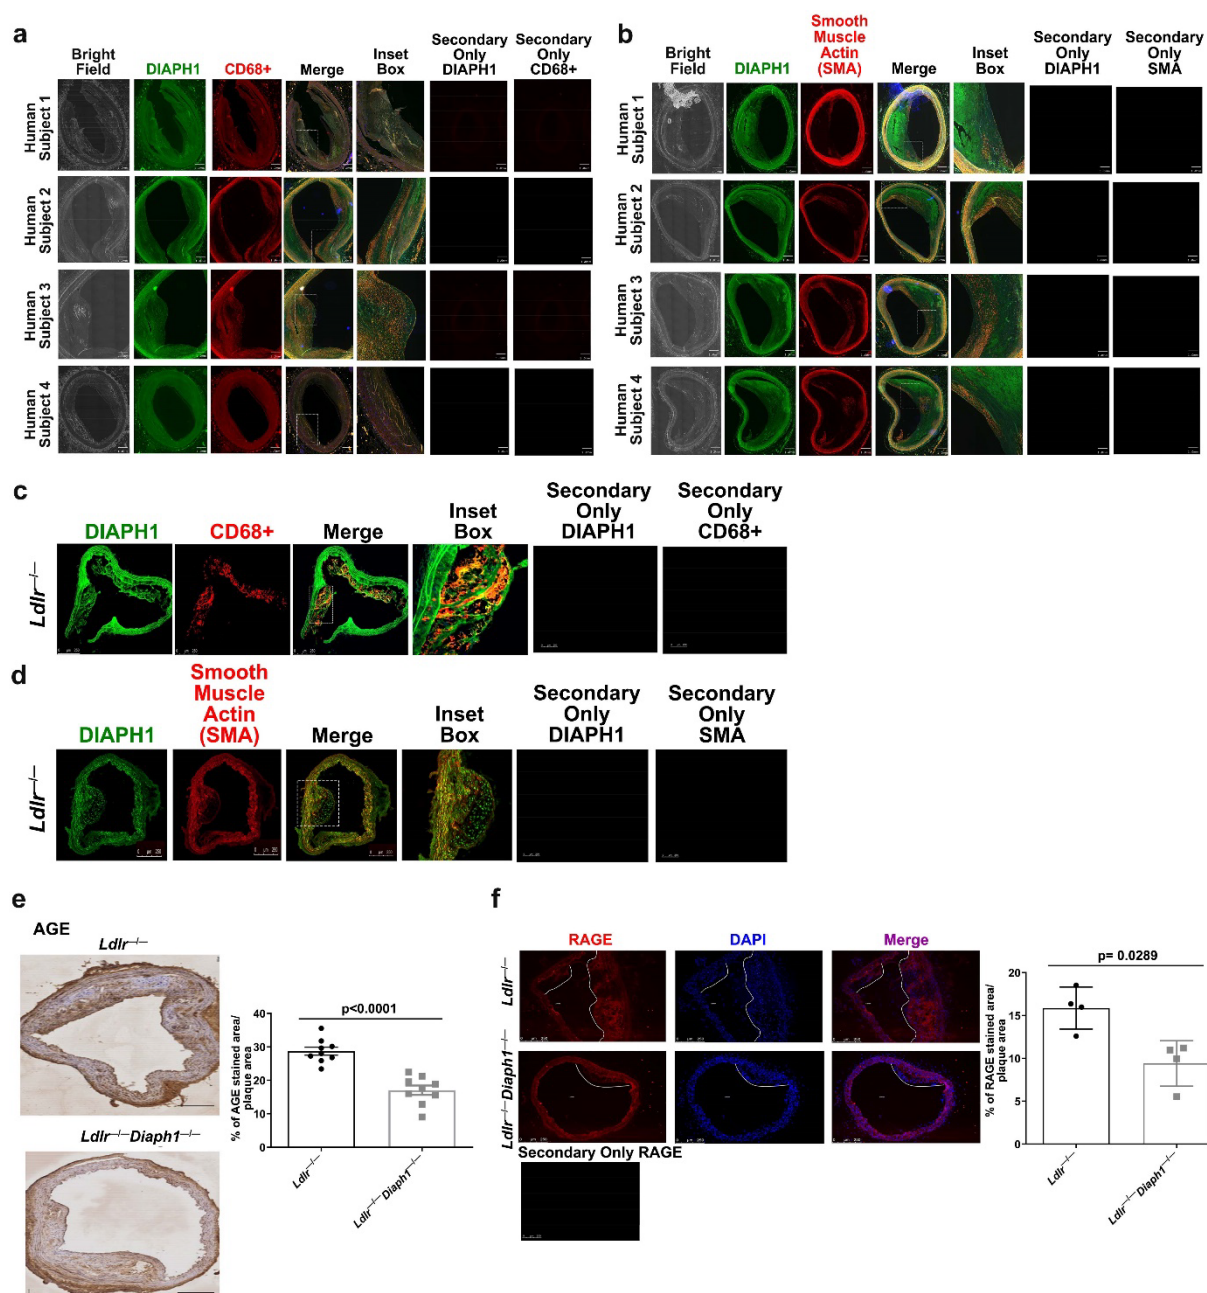

**Supplementary Figure 1. DIAPH1 is expressed in human and murine atherosclerotic lesions.** **a**, Immunofluorescence staining and colocalization of DIAPH1 and CD68 in N=4 non-diabetic human coronary atherosclerotic lesions. Scale bar: 1.0 mm; and inset box, 50  $\mu$ m. **b**, Immunofluorescence staining and colocalization of DIAPH1 and smooth muscle alpha actin (SMA) in N=4 non-diabetic human coronary atherosclerotic lesions. Scale bar: 1.0 mm; and inset box, 50  $\mu$ m. **c**, Immunofluorescence staining and colocalization of DIAPH1 and CD68 in aortic arch of male *Ldlr*<sup>-/-</sup> mice fed Western Diet (WD) for 16 weeks. Scale bar: 250  $\mu$ m; and inset box: 50  $\mu$ m. **d**, Immunofluorescence staining and colocalization of DIAPH1 and SMA in aortic arch of

male *Ldlr*<sup>-/-</sup> mice fed WD for 16 weeks. Scale bar: 250  $\mu\text{m}$ ; and inset box: 50  $\mu\text{m}$ . In a-d, the secondary antibody-alone control is shown. **e,f**, *Ldlr*<sup>-/-</sup> and *Ldlr*<sup>-/-</sup> *Diaph1*<sup>-/-</sup> male mice were fed WD for 16 weeks. **e**, Representative staining and quantification of Advanced Glycation End Products (AGEs) in aortic arch sections. Scale bar: 250  $\mu\text{m}$ . **f**, Representative immunofluorescence staining and quantification of the Receptor of Advanced Glycation End Products (RAGE) in aortic arch sections. Scale bar: 250  $\mu\text{m}$ . The secondary antibody-alone control is shown in the figure. The mean  $\pm$  SEM is reported. The number of independent mice/group is indicated in the figure as individual data points. Statistical analyses regarding testing for the normality of data followed by appropriate statistical analyses were described in Materials and Methods. *P* values were determined by unpaired t test and Wilcoxon rank-sum test depending on if the data passed the Shapiro-Wilk normality test.

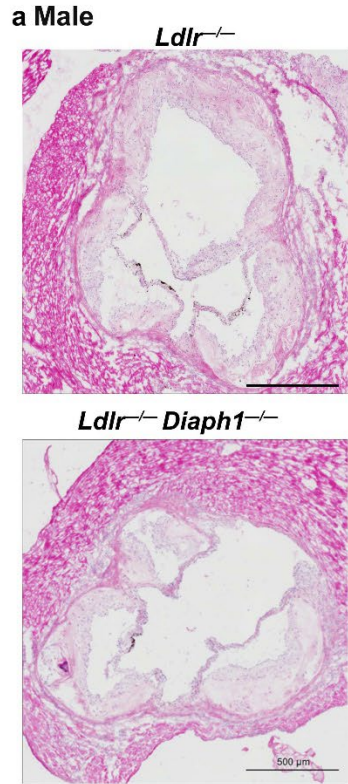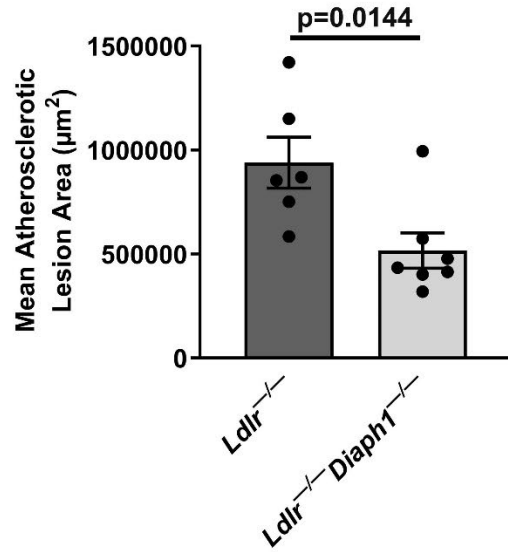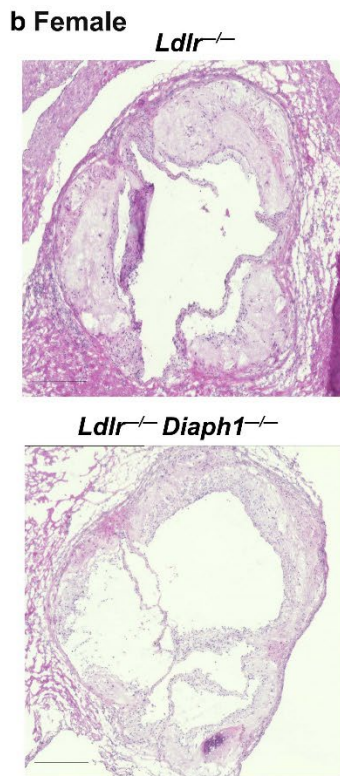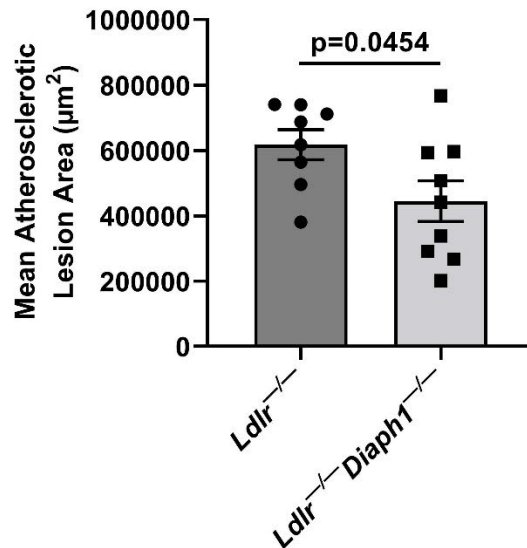

**Supplementary Figure 2.** Effect of deletion of *Diaph1* in *Ldlr*<sup>-/-</sup> mice on atherosclerosis at the aortic sinus. Male (a) and female (b) *Ldlr*<sup>-/-</sup> mice were fed WD for 16 weeks; at sacrifice,

the mice were perfused and sections were taken from the aortic sinus for assessment of atherosclerosis by H&E staining. Scale bar: (a), 500  $\mu\text{m}$  and (b), 250  $\mu\text{m}$ . The mean  $\pm$  SEM is reported. The number of independent mice/group is indicated in the figure as individual data points. Statistical analyses regarding testing for the normality of data followed by appropriate statistical analyses were described in Materials and Methods. According to these analyses, *P* values were determined by unpaired T test (a) and Wilcoxon rank sum test (b).

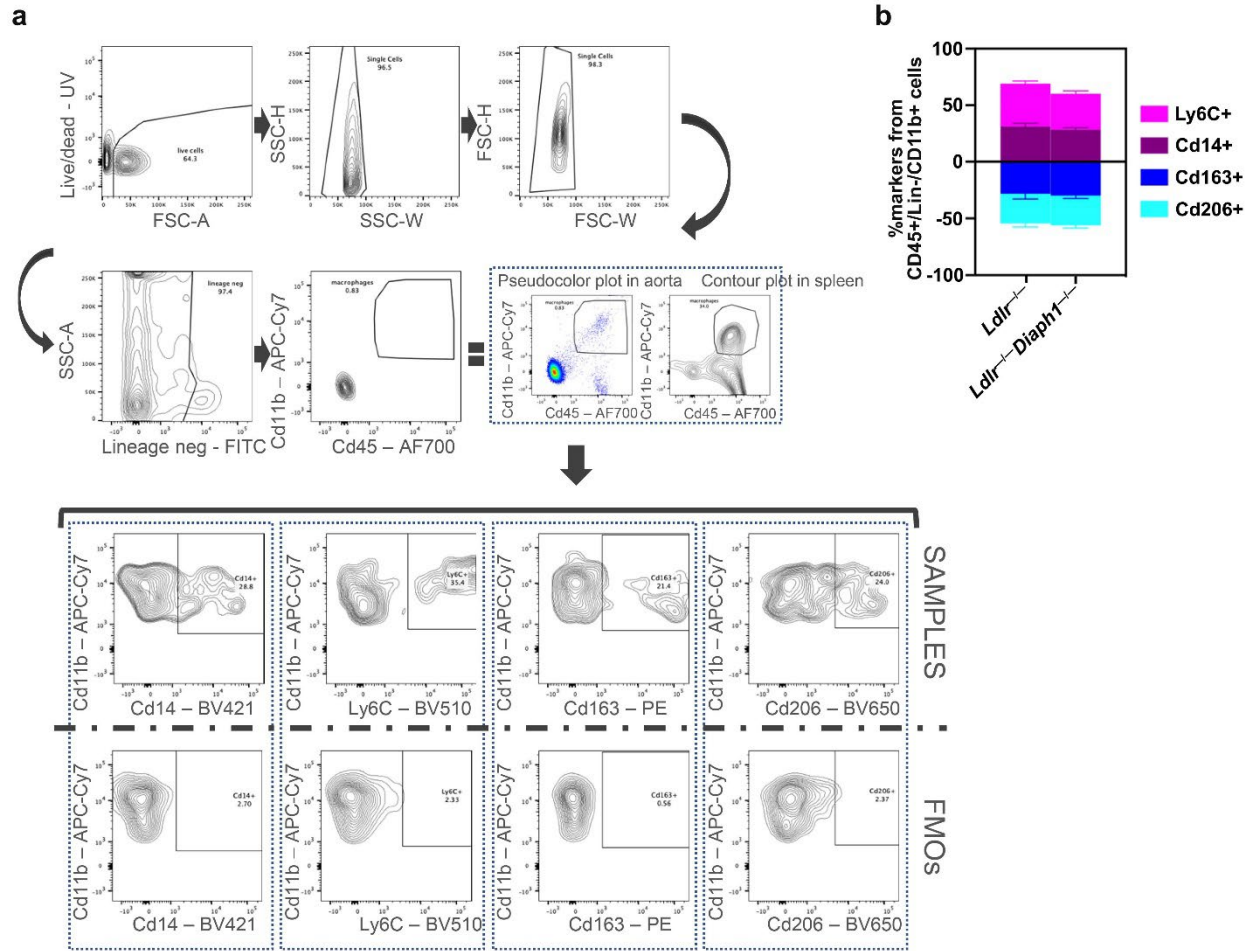

**Supplementary Figure 3. Effect of deletion of *Diaph1* in *Ldlr*<sup>-/-</sup> mice on aortic arch macrophage characterization.** *Ldlr*<sup>-/-</sup> and *Ldlr*<sup>-/-</sup>*Diaph1*<sup>-/-</sup> male mice were fed WD for 16-18 weeks and aortic arches were perfused and retrieved for flow cytometry assay. **a**, gating strategy used for the analysis and characterization of macrophages isolated from aortic arches. Live single cells gated as CD45<sup>+</sup> CD11b<sup>+</sup> Lin<sup>-</sup> are used to delineate populations presumed to be macrophages. Additional gating was used to demonstrate the percentage of either CD14<sup>+</sup>, Ly6C<sup>+</sup>, CD163<sup>+</sup> and CD206<sup>+</sup>. **b**, percentage of Ly6C<sup>+</sup>, CD14<sup>+</sup>, CD163<sup>+</sup> and CD206<sup>+</sup> macrophages in each genotype. The mean ± SEM is reported and in n=8 *Ldlr*<sup>-/-</sup> and n=10 *Ldlr*<sup>-/-</sup>*Diaph1*<sup>-/-</sup> mice. Statistical analyses regarding testing for the normality of data followed by appropriate statistical analyses were described in Materials and Methods. According to these analyses, *P* values were determined by unpaired t test. **Supplementary Table 1** details all of the biological replicates for each condition and the associated statistical analysis.

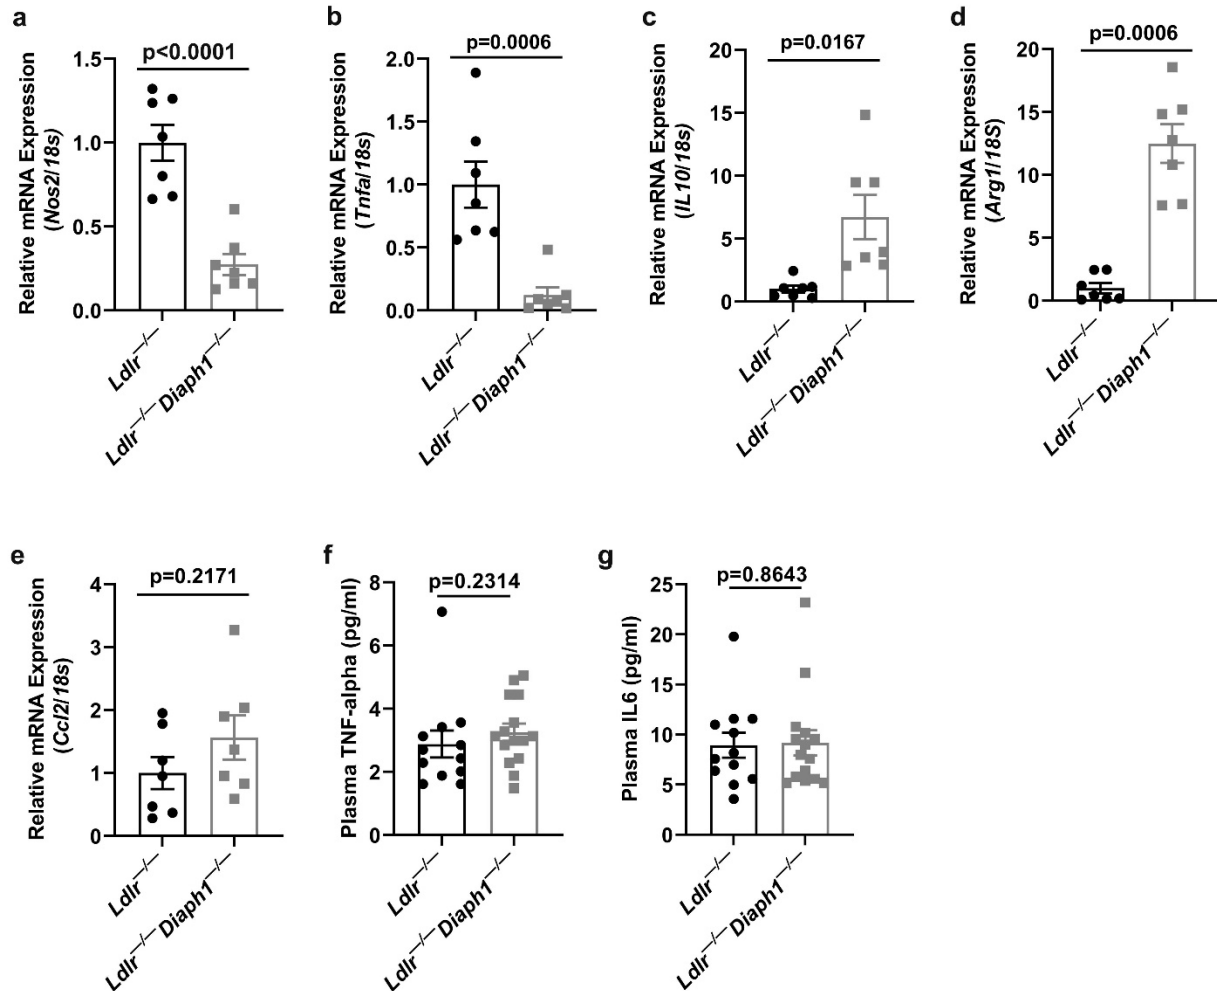

**Supplementary Figure 4. Effect of deletion of *Diaph1* in male *Ldlr*<sup>-/-</sup> mice on aortic inflammation and plasma concentrations of TNF-alpha and IL6.** *Ldlr*<sup>-/-</sup> and *Ldlr*<sup>-/-</sup> *Diaph1*<sup>-/-</sup> male mice were fed WD for 16 weeks. **a-e**, the expression of genes encoding inflammatory mediators was determined by RT-qPCR from whole aortas isolated from the indicated mice. **a**, *Nos2*, **b**, *Tnfa*, **c**, *Il10*, **d**, *Arg1*, **e**, *Ccl2*. **f,g**, ELISA for the detection of plasma concentrations of TNF-alpha (**f**) and IL6 (**g**) is shown. The mean  $\pm$  SEM is reported. The number of independent mice/group is indicated in the figure as individual data points. Statistical analyses regarding testing for the normality of data followed by appropriate statistical analyses were described in Materials and Methods. *P* values were determined by unpaired t test and Wilcoxon rank-sum test depending on if the data passed the Shapiro-Wilk normality test.



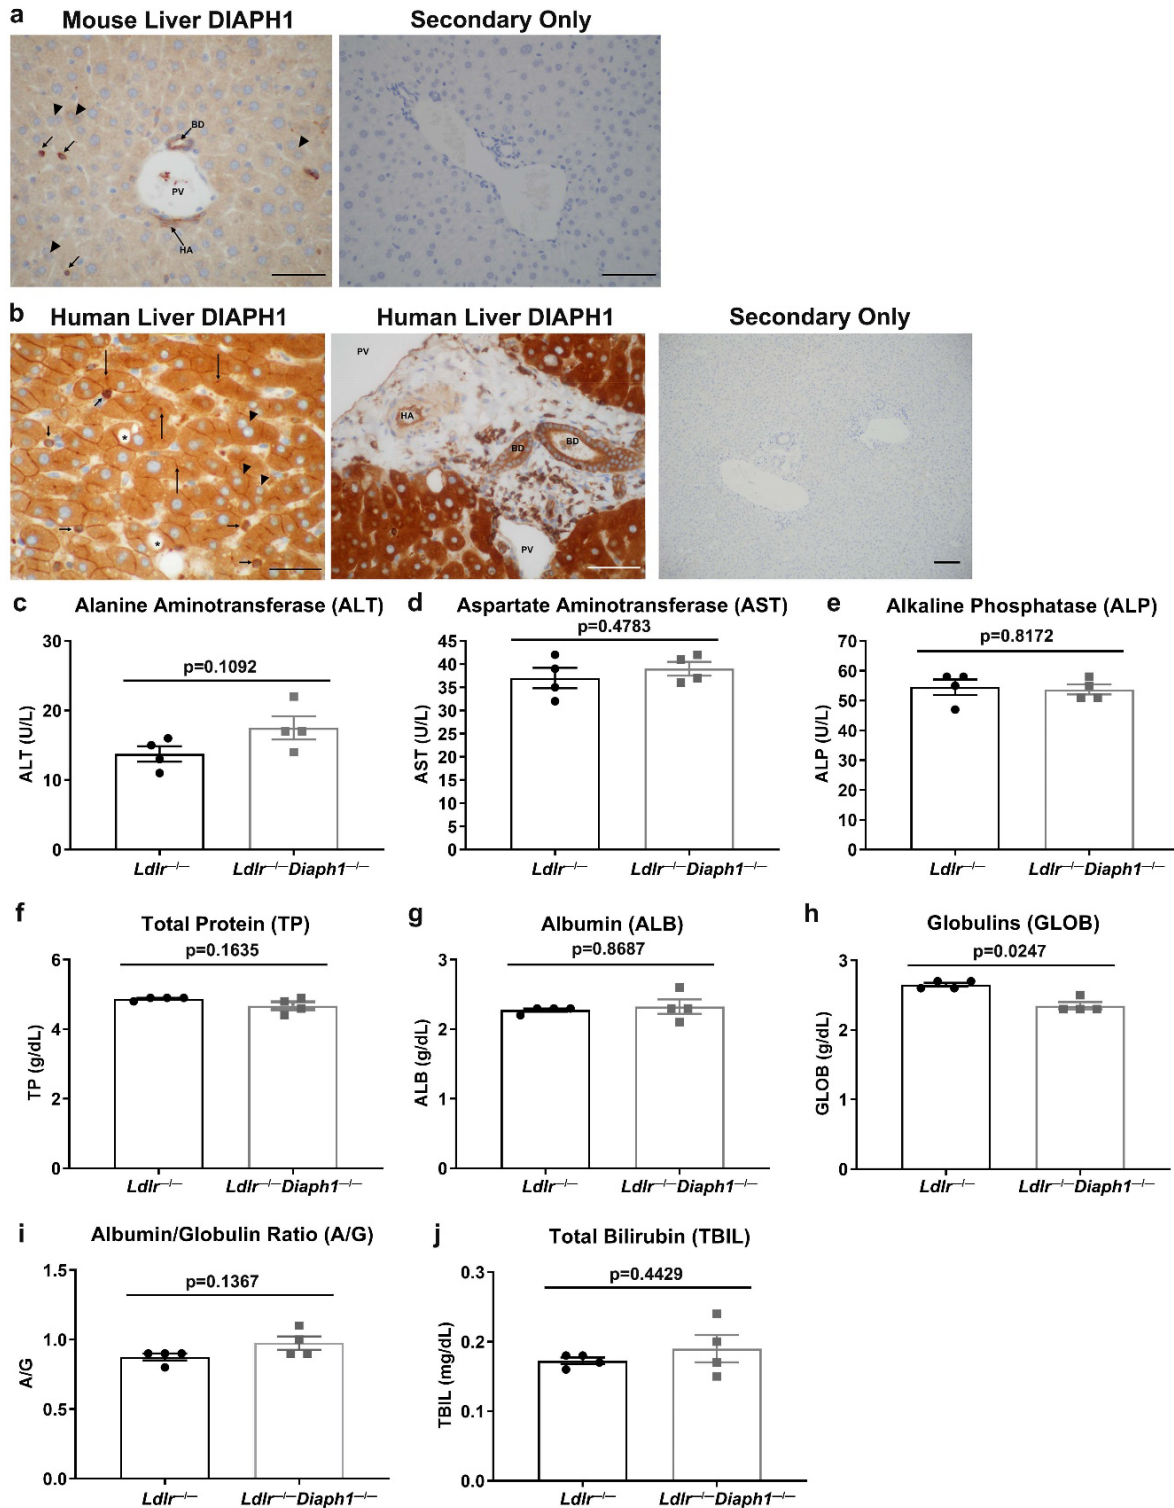

**Supplementary Figure 5. DIAPH1 is expressed, at least in part, in hepatocytes of mouse and human liver, and the effect of deletion of *Diaph1* in *Ldlr*<sup>-/-</sup> mice on plasma analytes.** a, mouse and b, human liver. Normal mouse (a) and normal human liver (b), the latter retrieved from a 52-year-old male subject, were subjected to fixation and immunohistochemistry using anti-



DIAPH1 IgG. The descriptions of the results are discussed in detail in the Results section. Abbreviations: BD, bile duct; PV, portal vein; and HA, hepatic artery. Scale bar: 50  $\mu$ m. c-j, *Ldlr*<sup>-/-</sup> and *Ldlr*<sup>-/-</sup>*Diaph1*<sup>-/-</sup> male mice were fed WD for 16 weeks and plasma was retrieved for detection of: c, alanine aminotransferase (ALT) concentrations. d, aspartate aminotransferase (AST) concentrations. e, alkaline phosphatase (ALP) concentrations. f, total plasma protein (TP) concentrations. g, albumin (ALB) concentrations. h, globulin (GLOB) concentrations. i, albumin/globulins (A/G) ratio. j, total bilirubin (TBIL) concentrations. The mean  $\pm$  SEM is reported. The number of independent mice/group is indicated in the figure as individual data points. Statistical analyses regarding testing for the normality of data followed by appropriate statistical analyses were described in Materials and Methods. *P* values were determined by unpaired t test and Wilcoxon rank-sum test depending on if the data passed the Shapiro-Wilk normality test.

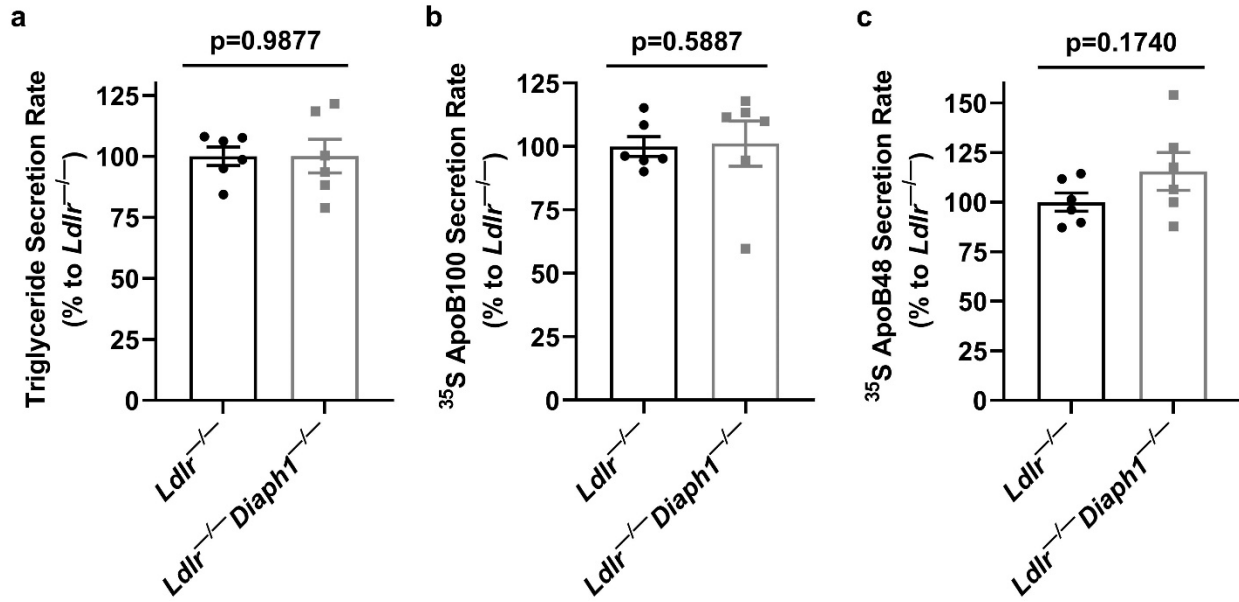

**Supplementary Figure 6. Effect of deletion of *Diaph1* in *Ldlr*<sup>-/-</sup> mice on plasma triglyceride and lipoprotein secretion.** *Ldlr*<sup>-/-</sup> and *Ldlr*<sup>-/-</sup> *Diaph1*<sup>-/-</sup> were fed chow diet. Secretion of **a**, triglyceride, **b**, apolipoprotein B100 (apoB100) and **c**, apolipoprotein B48 (apoB48) was determined *in vivo* two hours after injections of [<sup>35</sup>S]-protein labeled in *Ldlr*<sup>-/-</sup> and *Ldlr*<sup>-/-</sup> *Diaph1*<sup>-/-</sup> mice. The mean ± SEM is reported. The number of independent mice/group is indicated in the figure as individual data points. Statistical analyses regarding testing for the normality of data followed by appropriate statistical analyses were described in Materials and Methods. *P* values were determined by unpaired t test and Wilcoxon rank-sum test depending on if the data passed the Shapiro-Wilk normality test.

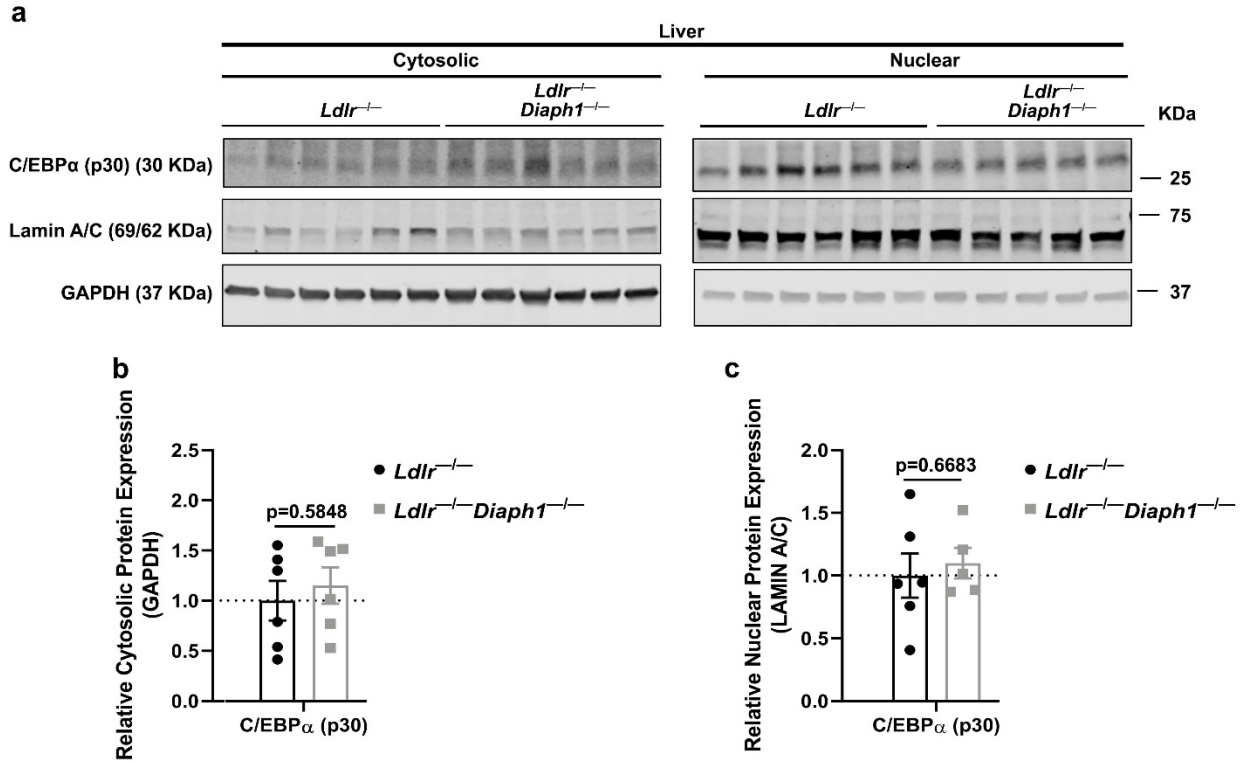

**Supplementary Figure 7. Deletion of *Diaph1* in *Ldlr*<sup>-/-</sup> mice does not affect nuclear content of C/EBPα (p30) in liver.** *Ldlr*<sup>-/-</sup> and *Ldlr*<sup>-/-</sup> *Diaph1*<sup>-/-</sup> male mice were fed WD for 16 weeks. **a**, Western blot for the detection of cytosolic and nuclear C/EBPα was performed on liver fractions isolated from the indicated mice. **b**, Quantification of cytosolic C/EBPα relative to GAPDH. **c**, Quantification of nuclear C/EBPα relative to Lamin A/C. The mean ± SEM is reported. The number of independent mice/group is indicated in the figure as individual data points. Statistical analyses regarding testing for the normality of data followed by appropriate statistical analyses were described in Materials and Methods. *P* values were determined by unpaired T test.

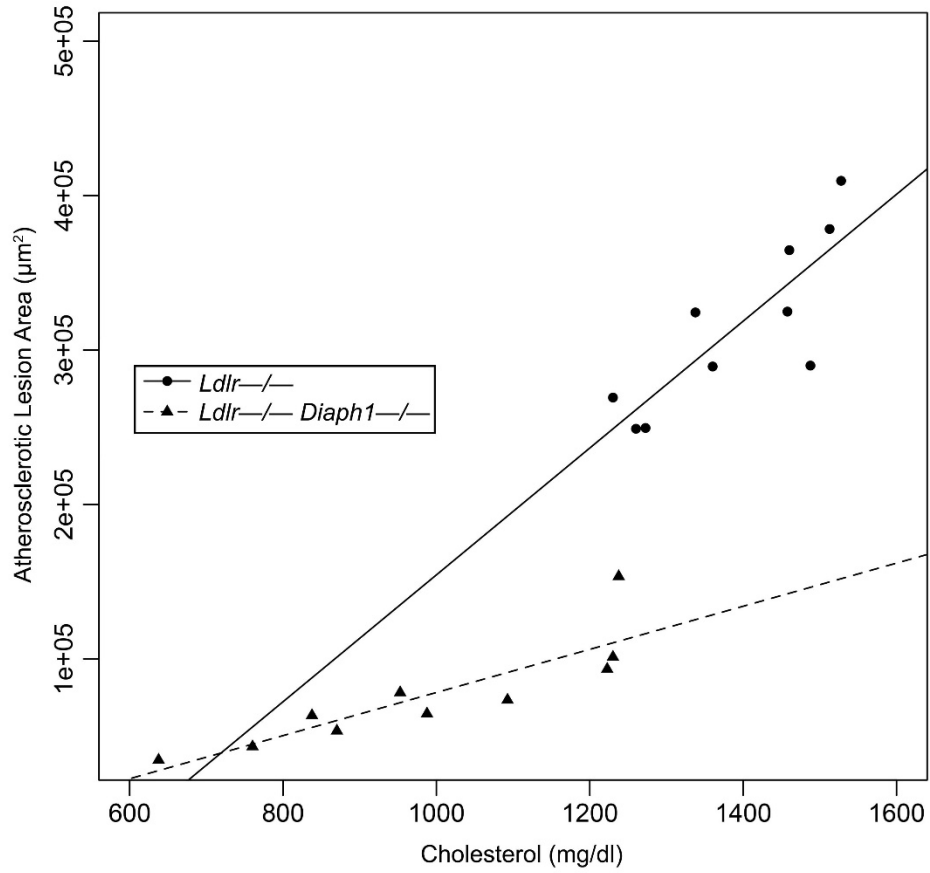

**Supplementary Figure 8. Dependence of atherosclerotic lesion area on the concentration of plasma cholesterol in male *Ldlr*<sup>-/-</sup> and *Ldlr*<sup>-/-</sup> *Diaph1*<sup>-/-</sup> male mice.** The graph is derived from data shown in Supplementary Table 9d.

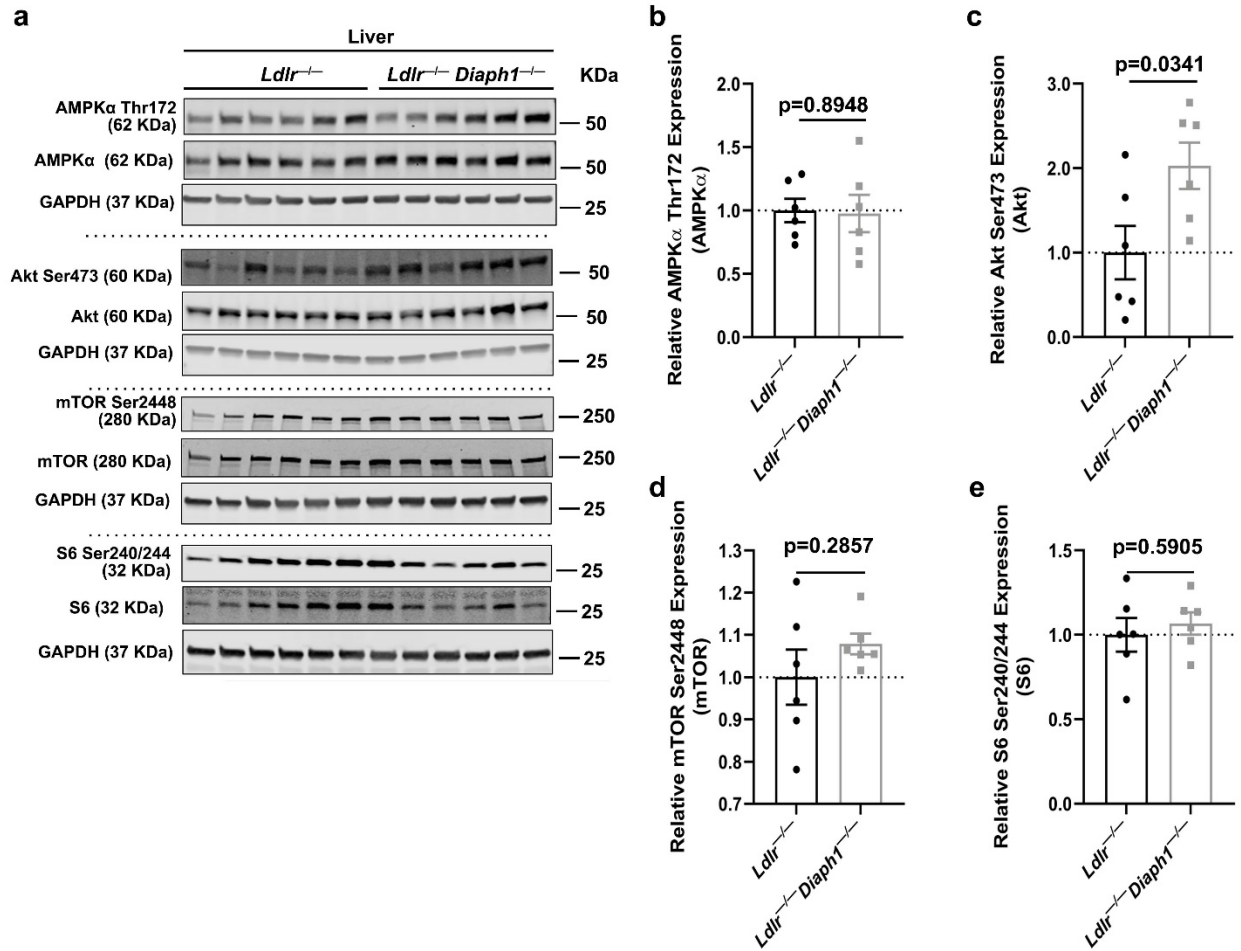

**Supplementary Figure 9. Deletion of *Diaph1* in *Ldlr*<sup>-/-</sup> mice does not affect AMPK $\alpha$ , AKT or mTOR pathways in liver.** *Ldlr*<sup>-/-</sup> and *Ldlr*<sup>-/-</sup> *Diaph1*<sup>-/-</sup> male mice were fed WD for 16 weeks. **a**, Western blot for the detection of phosphorylated (Thr172) AMPK $\alpha$ , AMPK $\alpha$ , phosphorylated (Ser473) AKT, AKT, phosphorylated (Ser2448) mTOR, mTOR, phosphorylated (Ser240/244) S6 and S6 performed on total liver lysates from the indicated mice. **b**, Quantification of phosphorylated (Thr172) AMPK $\alpha$  relative to total AMPK $\alpha$ . **c**, Quantification of phosphorylated (Ser473) AKT relative to total AKT. **d**, Quantification of phosphorylated (Ser2448) mTOR relative to total mTOR. **e**, Quantification of phosphorylated (Ser240/244) S6 relative to total S6. The mean  $\pm$  SEM is reported. The number of independent mice/group is indicated in the figure as individual data points. Statistical analyses regarding testing for the normality of data followed by appropriate statistical analyses were described in Materials and Methods. *P* values were determined by unpaired T test.

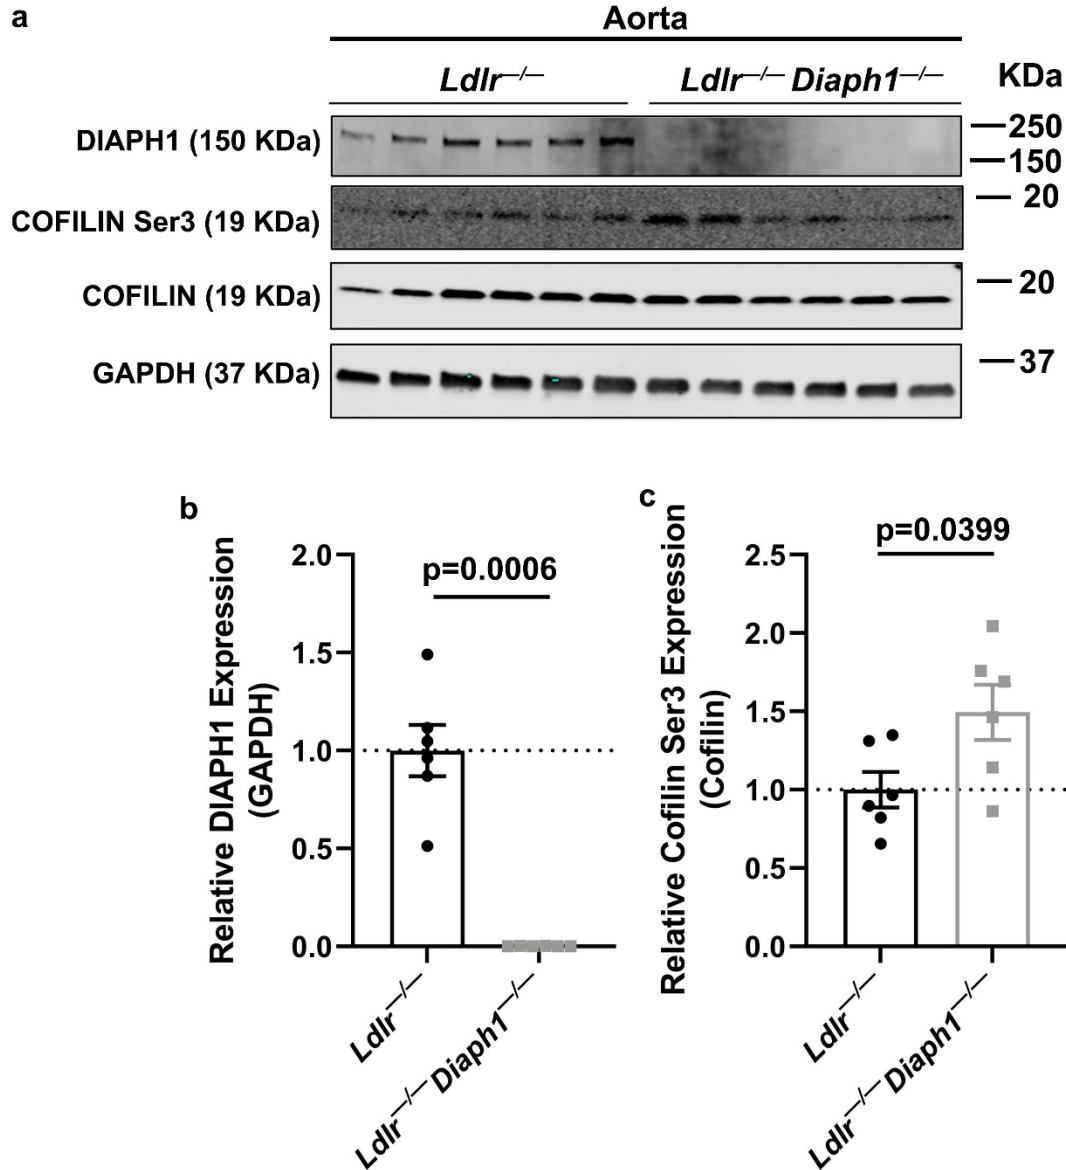

**Supplementary Figure 10. Deletion of *Diaph1* in *Ldlr*<sup>-/-</sup> mice increases phosphorylated (Ser3) Cofilin/total Cofilin in aortas.** *Ldlr*<sup>-/-</sup> and *Ldlr*<sup>-/-</sup> *Diaph1*<sup>-/-</sup> male mice were fed WD for 16 weeks. **a**, Western blot for the detection of DIAPH1, phosphorylated (Ser3) Cofilin and total Cofilin was performed on total lysates from aortas isolated from the indicated mice. **b**, Quantification of DIAPH1 relative to GAPDH. **c**, Quantification of phosphorylated (Ser3) Cofilin relative to total Cofilin. The mean  $\pm$  SEM is reported. The number of independent mice/group is indicated in the figure as individual data points. Statistical analyses regarding testing for the normality of data followed by appropriate statistical analyses were described in Materials and Methods. *P* values were determined by unpaired T test.



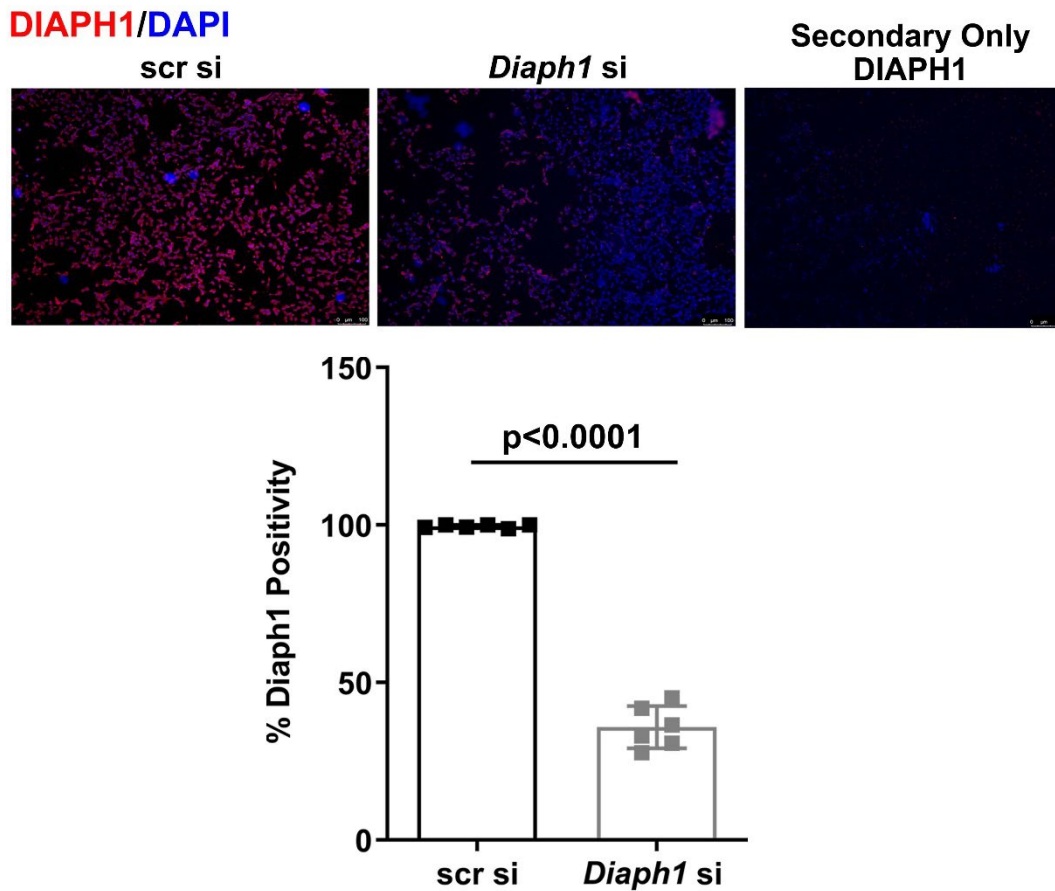

**Supplementary Figure 11. Silencing of *Diaph1* in Hepa 1-6 cells.** Representative immunofluorescence staining and quantification of DIAPH1 in murine Hepa1-6 after *Diaph1* or scramble control siRNA treatments. Scale bar: 250  $\mu$ m. The mean  $\pm$  SEM is reported. The number of independent mice/group is indicated in the figure as individual data points. Statistical analyses regarding testing for the normality of data followed by appropriate statistical analyses were described in Materials and Methods. *P* values were determined by unpaired T test or Wilcoxon rank-sum test depending if data passed the Shapiro-Wilk normality test.

## Supplementary Tables

**Supplementary Table 1. Effect of deletion of *Diaph1* in male *Ldlr*<sup>-/-</sup> mice on aortic arch macrophage characterization: flow cytometry studies**

|      | <i>Ldlr</i> <sup>-/-</sup><br>(% markers/total macrophages) |         |         |         | <i>Ldlr</i> <sup>-/-</sup> <i>Diaph1</i> <sup>-/-</sup><br>(% markers/total macrophages) |         |         |         |
|------|-------------------------------------------------------------|---------|---------|---------|------------------------------------------------------------------------------------------|---------|---------|---------|
|      | CD14+                                                       | Ly6C+   | CD163+  | CD206+  | CD14+                                                                                    | Ly6C+   | CD163+  | CD206+  |
|      | 19.70                                                       | 37.55   | 13.75   | 20.07   | 21.74                                                                                    | 37.89   | 18.63   | 23.60   |
|      | 24.49                                                       | 38.78   | 7.14    | 12.24   | 28.38                                                                                    | 31.08   | 23.65   | 27.70   |
|      | 30.21                                                       | 28.13   | 21.88   | 31.25   | 30.16                                                                                    | 28.57   | 25.40   | 28.57   |
|      | 26.47                                                       | 28.47   | 32.90   | 23.32   | 25.58                                                                                    | 24.42   | 22.09   | 34.88   |
|      | 36.97                                                       | 45.66   | 30.96   | 24.72   | 32.76                                                                                    | 36.64   | 46.12   | 28.02   |
|      | 28.43                                                       | 36.78   | 35.79   | 24.45   | 30.99                                                                                    | 25.93   | 32.31   | 16.04   |
|      | 44.00                                                       | 44.80   | 46.40   | 40.80   | 21.30                                                                                    | 44.38   | 28.40   | 16.57   |
|      | 39.29                                                       | 41.07   | 36.31   | 33.33   | 36.25                                                                                    | 26.76   | 31.63   | 17.27   |
|      |                                                             |         |         |         | 22.30                                                                                    | 19.42   | 36.69   | 33.81   |
|      |                                                             |         |         |         | 35.48                                                                                    | 41.13   | 33.06   | 37.10   |
| Mean | 31.1942                                                     | 37.6530 | 28.1411 | 26.2746 | 28.4946                                                                                  | 31.6227 | 29.7988 | 26.3574 |
| SEM  | 2.8995                                                      | 2.3299  | 4.5832  | 3.0918  | 1.7652                                                                                   | 2.5468  | 2.5329  | 2.4616  |
| N    | 8                                                           | 8       | 8       | 8       | 10                                                                                       | 10      | 10      | 10      |

Unpaired t test

|        | CD14+  | Ly6C+  | CD163+ | CD206+ |
|--------|--------|--------|--------|--------|
| pvalue | 0.4184 | 0.1072 | 0.7429 | 0.9833 |

**Supplementary Table 2. Body Weight and Biochemical Parameters in Female *Ldlr*<sup>-/-</sup> vs. *Ldlr*<sup>-/-</sup>*Diaph1*<sup>-/-</sup> Mice on WD for 16 Weeks**

| <b><u>Parameter</u></b> | <b><u>Mouse Group</u></b>  |                                                         |
|-------------------------|----------------------------|---------------------------------------------------------|
|                         | <i>Ldlr</i> <sup>-/-</sup> | <i>Ldlr</i> <sup>-/-</sup> <i>Diaph1</i> <sup>-/-</sup> |
| Body Mass (g)           | 20.0 ± 0.9 (N=8)           | 21.2 ± 0.7 (N=9); p= 0.3070                             |
| Cholesterol (mg/dL)     | 1094.0 ± 84.1 (N=8)        | 604.3 ± 21.7 (N=9); p<0.0001                            |
| Triglyceride (mg/dL)    | 116.9 ± 17.0 (N=8)         | 99.9 ± 10.6 (N=9); p=0.3690                             |
| Glucose (mg/dL)         | 131.5 ± 11.1 (N=8)         | 128.1 ± 6.3 (N=9); p=0.7880                             |

Values represent Mean±SEM.

**Supplementary Table 3. Significant Signaling Pathway Impact Analysis (KEGG) Pathways**

| <u>Pathway</u>                          | <u>Size/Overlap</u> | <u>P-value</u> <sup>^</sup> | <u>FDR</u> <sup>^</sup> |
|-----------------------------------------|---------------------|-----------------------------|-------------------------|
| Renin-angiotensin system                | 14/1                | 0.002                       | 0.47                    |
| Systemic lupus erythematosus            | 44/6                | 0.006                       | 0.74                    |
| Neuroactive ligand-receptor interaction | 67/3                | 0.017                       | 0.83                    |
| Propanoate metabolism                   | 27/4                | 0.018                       | 0.83                    |
| Peroxisome                              | 76/7                | 0.026                       | 0.83                    |
| <b>Glycerophospholipid metabolism</b>   | 67/7                | 0.042                       | 0.83                    |
| Porphyryn and chlorophyll metabolism    | 35/4                | 0.043                       | 0.83                    |
| Sulfur metabolism                       | 9/2                 | 0.044                       | 0.83                    |

<sup>^</sup>All p values and FDR values above refer to those computed for the KEGG pathway analysis. All of the genes included within the above pathways fulfill the criteria: p<0.05 and FDR<0.05.

**Supplementary Table 4. Reactome “Metabolism” (top hit) pathway: 70 differentially expressed genes**

| <u>Gene Symbol</u> | <u>Gene Name</u>                                        | <u>Gene function (general)</u>              |
|--------------------|---------------------------------------------------------|---------------------------------------------|
| <i>Tat</i>         | tyrosine aminotransferase                               | tyrosine metabolism                         |
| <i>Fmo2</i>        | flavin-containing<br>Dimethylaniline monooxygenase2     | alkylamine metabolism                       |
| <i>Aadat</i>       | aminoadipate aminotransferase                           | amino acid metabolism                       |
| <i>Hprt</i>        | Hypoxanthine<br>Phosphoribosyltransferase 1             | generation of purine nucleotides            |
| <i>Lypla1</i>      | lysophospholipase 1                                     | <b>fatty acid metabolism</b>                |
| <i>Cpox</i>        | coproporphyrinogenIII oxidase                           | heme metabolism                             |
| <i>Adhd3</i>       | Abhydrolase domain containing 3                         | (possible) <b>phospholipase 1 activity</b>  |
| <i>Amacr</i>       | alpha methyl acyl co-A racemase                         | <b>fatty acid metabolism</b>                |
| <i>Acer2</i>       | alkaline ceramidase 2                                   | <b>ceramide metabolism</b>                  |
| <i>Lpin1</i>       | phosphatidate phosphatase 1                             | <b>triglyceride synthesis</b>               |
| <i>Nudt16</i>      | nudix hydrolase 16                                      | nucleotide metabolism                       |
| <i>Gclm</i>        | glutamate-cysteine ligase<br>Modifier subunit           | glutathione synthesis                       |
| <i>Rrm1</i>        | ribonucleotide reductase catalytic<br>Subunit M1        | nucleotide metabolism                       |
| <i>Mtmr7</i>       | myotubularin related protein 7                          | tyrosine dual specificity phosphatase       |
| <i>Pla1a</i>       | phospholipase A1 member A                               | <b>fatty acid metabolism</b>                |
| <i>Ugt2b38</i>     | UDP glucuronosyltransferase<br>Family 2 member b28      | steroid/drug metabolism                     |
| <i>Car1</i>        | carbonic anhydrase 1                                    | carbonate dehydratase activity              |
| <i>Sat1</i>        | spermidine/spermine N1-<br>Acetyltransferase1           | polyamine metabolism                        |
| <i>Hscb</i>        | HscB mitochondrial iron-sulfur<br>Cluster cochaperone   | mitochondrial electron transport metabolism |
| <i>Serinc1</i>     | serine incorporator 1                                   | serine and <b>lipid metabolism</b>          |
| <i>Dct</i>         | dopachrome tautomerase                                  | tyrosine metabolism                         |
| <i>Prkacb</i>      | protein kinase CAMP-activated<br>Catalytic subunit beta | serine/threonine protein kinase             |
| <i>Vapa</i>        | VAMP associated protein A                               | vesicle trafficking, migration              |
| <i>Chka</i>        | choline kinase alpha                                    | ethanolamine metabolism                     |
| <i>Akr1c6</i>      | aldo-keto reductase C6                                  | aldo-keto reductase metabolism              |
| <i>Fabp7</i>       | fatty acid binding protein 7                            | <b>fatty acid metabolism</b>                |
| <i>Pnpla8</i>      | patatin like phospholipase<br>Domain containing 8       | <b>fatty acid metabolism</b>                |

|                |                                                           |                                                               |
|----------------|-----------------------------------------------------------|---------------------------------------------------------------|
| <i>Mfsd2a</i>  | major facilitator superfamily<br>Domain containing 2a     | <b>lysophosphatidylcholine metabolism</b>                     |
| <i>Pcca</i>    | propionyl CoA carboxylase<br>Subunit alpha                | <b>fatty acid</b> and branched chain amino acid<br>metabolism |
| <i>Ppt1</i>    | palmitoyl protein thioesterase 1                          | <b>lipid metabolism</b>                                       |
| <i>Idh3a</i>   | isocitrate dehydrogenase                                  | tricarboxylic acid metabolism                                 |
| <i>Otc</i>     | ornithine carbamoyltransferase                            | ornithine metabolism                                          |
| <i>Echs1</i>   | enoyl coA hydratase short chain 1                         | <b>fatty acid oxidation</b>                                   |
| <i>Ugt3a2</i>  | UDP glycosyltransferase family 3<br>Member A2             | glycosyltransferase metabolism                                |
| <i>Calm2</i>   | calmodulin 2                                              | protein kinases and phosphatases, calcium<br>family           |
| <i>Nudt7</i>   | nudix hydrolase 7                                         | nucleotide metabolism                                         |
| <i>Tpk1</i>    | thiamine pyrophosphokinase 1                              | thiamine metabolism                                           |
| <i>Gpat2</i>   | glycerol-3-phosphate acyltransferase 2                    | <b>glycerolipid biosynthesis</b>                              |
| <i>Pdpr</i>    | pyruvate dehydrogenase phosphatase<br>Regulatory subunit  | <b>fatty acid synthesis</b> , TCA cycle                       |
| <i>Acacb</i>   | acetyl-coA-carboxylase beta                               | <b>fatty acid synthesis</b>                                   |
| <i>Ip6k2</i>   | inositol hexakisphosphate kinase 2                        | inositol phosphate metabolism                                 |
| <i>Bbox1</i>   | gamma butyrobetaine hydroxylase1                          | <b>fatty acid metabolism</b>                                  |
| <i>Rapgef4</i> | rap guanine nucleotide exchange<br>Factor 4               | GPCR signaling                                                |
| <i>Alox5ap</i> | arachidonate 5-lipoxygenase<br>Activating protein         | leukotriene synthesis                                         |
| <i>Lpin2</i>   | lipin 2                                                   | triglyceride metabolism                                       |
| <i>Mat2b</i>   | methionine adenosyltransferase 2b                         | methionine metabolism                                         |
| <i>Serinc5</i> | serine incorporator 5                                     | serine and glycosphingolipid metabolism                       |
| <i>Pfkfb3</i>  | 6-phospho-fructo-2-kinase/<br>Fructose-2,6-biphosphatase3 | glycolysis                                                    |
| <i>Phyh</i>    | Phytanoyl-CoA 2-Hydroxylase                               | <b>fatty acid metabolism</b>                                  |
| <i>Slc35d1</i> | soluble carrier family<br>35 member D1                    | glucuronidation pathway                                       |
| <i>Acaca</i>   | Acetyl-CoA Carboxylase Alpha                              | <b>fatty acid synthesis</b>                                   |
| <i>Abcd4</i>   | ATP Binding Cassette<br>Subfamily D Member 4              | <b>fatty acid transport</b>                                   |
| <i>Cryll</i>   | crystallin lambda 1                                       | glucose metabolism                                            |
| <i>Akr1c20</i> | Aldo-Keto Reductase Family 1<br>Member C20                | aldo-ketoreductase metabolism                                 |
| <i>Dck</i>     | Deoxycytidine Kinase                                      | nucleotide metabolism                                         |
| <i>L2hgdh</i>  | L-2-Hydroxyglutarate<br>Dehydrogenase                     | pyruvate and TCA metabolism                                   |
| <i>Acadsb</i>  | Short/branched chain                                      | <b>fatty acid/branched chain amino acid</b>                   |

|                |                                                                             |                                  |
|----------------|-----------------------------------------------------------------------------|----------------------------------|
| <i>Cyp26b</i>  | acyl-CoA dehydrogenase<br>cytochrome p450 family 26<br>Subfamily B member 1 | metabolism<br>drug metabolism    |
| <i>Sult2a8</i> | sulfotransferase family 2A,<br>Dehydroepiandrosterone                       | steroid metabolism               |
| <i>Rab5a</i>   | RAB5A, Member<br>RAS Oncogene Family                                        | GPCR signaling                   |
| <i>Bpnt1</i>   | bisphosphate 3-prime-<br>Nucleotidase                                       | nucleotide metabolism            |
| <i>Ugt2a3</i>  | UDP Glucuronosyltransferase<br>Family 2 Member A3                           | drug metabolism                  |
| <i>Slc35b2</i> | soluble carrier family<br>35 member B2                                      | sulfation processes              |
| <i>Plcd3</i>   | 1-Phosphatidylinositol-4,5-<br>bisphosphate phosphodiesterase<br>delta-3    | <b>fatty acid metabolism</b>     |
| <i>Fmod</i>    | fibromodulin                                                                | collagen metabolism              |
| <i>Hmox1</i>   | heme oxygenase                                                              | heme metabolism                  |
| <i>Lum</i>     | lumican                                                                     | collagen metabolism              |
| <i>Impad1</i>  | inositol monophosphatase<br>domain containing 1                             | inositol metabolism              |
| <i>Akr1d1</i>  | Aldo-Keto Reductase<br>Family 1 Member D1                                   | bile acid and steroid metabolism |
| <i>Rfk</i>     | riboflavin kinase                                                           | riboflavin metabolism            |

---



**Supplementary Table 5. Significant Reactome Pathways**

| <u>Pathway</u>                                                                  | <u>Size/Overlap</u> | <u>P-value<sup>^</sup></u> | <u>FDR<sup>^</sup></u> |
|---------------------------------------------------------------------------------|---------------------|----------------------------|------------------------|
| <b>Metabolism</b>                                                               | 1810/70             | 0.000002                   | 0.004                  |
| Phase II Conjugation of compounds                                               | 105/10              | 0.0001                     | 0.11                   |
| <b>Protein Localization</b>                                                     | 73/8                | 0.0003                     | 0.13                   |
| <b>Synthesis of phosphatidylcholine</b>                                         | 27/5                | 0.0003                     | 0.13                   |
| <b>Synthesis of bile acids and bile salts<br/>via 24-hydroxycholesterol</b>     | 19/4                | 0.0008                     | 0.25                   |
| <b>Transport of nucleotide sugars</b>                                           | 9/3                 | 0.0009                     | 0.25                   |
| <b>Triglyceride metabolism</b>                                                  | 23/4                | 0.002                      | 0.31                   |
| Biotin transport and metabolism                                                 | 11/3                | 0.002                      | 0.31                   |
| <b>Synthesis of phosphatidylethanolamine</b>                                    | 11/3                | 0.002                      | 0.31                   |
| Glucuronidation                                                                 | 24/4                | 0.002                      | 0.33                   |
| <b>Triglyceride biosynthesis</b>                                                | 12/3                | 0.002                      | 0.34                   |
| Regulation of complement cascade                                                | 42/5                | 0.003                      | 0.34                   |
| Cytosolic sulfonation of small molecules                                        | 26/4                | 0.003                      | 0.34                   |
| <b>Peroxisomal protein import</b>                                               | 65/6                | 0.004                      | 0.43                   |
| <b>Synthesis of bile acids and bile salts<br/>via 7alpha-hydroxycholesterol</b> | 19/4                | 0.0008                     | 0.25                   |
| Depolymerization of the nuclear lamina                                          | 29/4                | 0.004                      | 0.45                   |
| Complement cascade                                                              | 15/3                | 0.004                      | 0.45                   |
| <b>Fatty acid metabolism</b>                                                    | 48/5                | 0.005                      | 0.45                   |
| <b>Glycerophospholipid biosynthesis</b>                                         | 196/11              | 0.006                      | 0.51                   |
| <b>Glycerophospholipid biosynthesis</b>                                         | 119/8               | 0.006                      | 0.52                   |
| <b>Metabolism of Lipids</b>                                                     | 652/25              | 0.008                      | 0.65                   |
| <b>ChREBP activates metabolic<br/>gene expression</b>                           | 7/2                 | 0.01                       | 0.67                   |
| Pre-NOTCH processing in Golgi                                                   | 7/2                 | 0.01                       | 0.67                   |
| TP53 regulates transcription of genes<br>involved in cytochrome c release       | 7/2                 | 0.01                       | 0.67                   |
| TP53 regulates transcription of genes<br>involved in G2 cell cycle arrest       | 7/2                 | 0.01                       | 0.67                   |
| <b>Synthesis of bile acids and bile salts<br/>via 27-hydroxycholesterol</b>     | 20/3                | 0.01                       | 0.67                   |
| <b>Synthesis of bile acids and bile salts</b>                                   | 39/4                | 0.01                       | 0.73                   |
| <b>Phospholipid metabolism</b>                                                  | 191/10              | 0.01                       | 0.73                   |
| Biological oxidations                                                           | 251/12              | 0.01                       | 0.73                   |
| Mitochondrial protein import                                                    | 8/2                 | 0.01                       | 0.73                   |
| Terminal pathway of complement                                                  | 8/2                 | 0.01                       | 0.73                   |

|                                                                 |             |             |             |
|-----------------------------------------------------------------|-------------|-------------|-------------|
| <b>Transport of vitamins, nucleosides and related molecules</b> | <b>41/4</b> | <b>0.01</b> | <b>0.75</b> |
| Neutrophil degranulation                                        | 514/20      | 0.01        | 0.75        |
| Serine biosynthesis                                             | 9/2         | 0.02        | 0.81        |
| Pre-NOTCH expression and processing                             | 9/2         | 0.02        | 0.82        |
| Receptor mediated mitophagy                                     | 11/2        | 0.03        | 1           |
| <b>Bile acid and bile salt metabolism</b>                       | 51/4        | 0.03        | 1           |
| Keratan sulfate degradation                                     | 12/2        | 0.03        | 1           |
| Metabolism of vitamins and cofactors                            | 189/9       | 0.03        | 1           |
| <b>Peroxisomal lipid metabolism</b>                             | 30/3        | 0.03        | 1           |
| eNOS activation                                                 | 13/2        | 0.03        | 1           |
| Signaling by retinoic acid                                      | 56/4        | 0.04        | 1           |
| Purine salvage                                                  | 14/2        | 0.04        | 1           |
| Rap1 signaling                                                  | 14/2        | 0.04        | 1           |
| <b>Transport of small molecules</b>                             | 686/23      | 0.04        | 1           |
| Negative regulation of NOTCH4 signaling                         | 2/1         | 0.045       | 1           |
| Transfer of LPS from LBP carrier to CD14                        | 2/1         | 0.045       | 1           |
| NOTCH4 activation and transmission of signal to the nucleus     | 2/1         | 0.045       | 1           |
| <b>Import of palmitoyl CoA into the mitochondrial matrix</b>    | 15/2        | 0.045       | 1           |
| TP53 regulates transcription of cell death genes                | 15/2        | 0.045       | 1           |
| RA biosynthesis pathway                                         | 35/3        | 0.046       | 1           |

^All p values and FDR values above refer to those computed for the Reactome pathway analysis. All of the genes included within the above Reactome pathways fulfill the criteria:  $p < 0.05$  and  $FDR < 0.05$ .

Categories highlighted in BOLD reflect examples of pathways related to lipid metabolism, protein localization and transport and actin cytoskeleton.

**Supplementary Table 6. Significant Gene Ontology Biological Process pathways**

| Symbol     | Pathway                                                                             | Size/Overlap | <i>P</i> -value |
|------------|-------------------------------------------------------------------------------------|--------------|-----------------|
| GO:0002084 | Protein depalmitoylation                                                            | 9/4          | 0.000           |
| GO:0070268 | Cornification                                                                       | 2/2          | 0.001           |
| GO:0090285 | Negative regulation of protein glycosylation in Golgi                               | 2/2          | 0.001           |
| GO:006103  | 2-oxoglutarate metabolic process                                                    | 16/4         | 0.003           |
| GO:0090481 | Pyrimidine nucleotide-sugar Transmembrane transport                                 | 9/3          | 0.004           |
| GO:1904219 | Positive regulation of CDP-diacylglycerol-Serine O-phosphatidyltransferase activity | 3/2          | 0.004           |
| GO:1904222 | Positive regulation of serine C-palmitoyltransferase activity                       | 3/2          | 0.004           |
| GO:0007625 | Grooming behavior                                                                   | 10/3         | 0.005           |
| GO:0039689 | Negative stranded viral RNA replication                                             | 4/2          | 0.008           |
| GO:0043305 | Negative regulation of mast cell degranulation                                      | 4/2          | 0.008           |
| GO:0002043 | Blood vessel endothelial cell proliferation involved in sprouting angiogenesis      | 12/3         | 0.009           |
| GO:0043484 | Regulation of RNA splicing                                                          | 112/10       | 0.010           |
| GO:0035020 | <b>Regulation of Rac protein signal transduction</b>                                | <b>13/3</b>  | <b>0.011</b>    |
| GO:0010269 | Response to selenium ion                                                            | 5/2          | 0.013           |
| GO:0015739 | Sialic acid transport                                                               | 5/2          | 0.013           |
| GO:0042997 | Negative regulation of Golgi to plasma membrane protein transport                   | 5/2          | 0.013           |
| GO:0045919 | Positive regulation of cytolysis                                                    | 5/2          | 0.013           |
| GO:0033628 | <b>Regulation of cell adhesion by integrin</b>                                      | 27/4         | 0.018           |
| GO:0031214 | Biom mineral tissue development                                                     | 88/8         | 0.018           |
| GO:0014883 | Transition between fast and slow fiber                                              | 6/2          | 0.019           |
| GO:0045964 | Positive regulation of dopamine metabolic process                                   | 6/2          | 0.019           |
| GO:0070973 | Protein localization to endoplasmic reticulum exit site                             | 6/2          | 0.019           |
| GO:0075044 | Autophagy of host cells involved in interaction with symbiont                       | 6/2          | 0.019           |
| GO:2000302 | Positive regulation of synaptic vesicle exocytosis                                  | 6/2          | 0.019           |
| GO:0006625 | Protein targeting to peroxisome                                                     | 16/3         | 0.021           |
| GO:0048169 | Regulation of long-term neuronal synaptic plasticity                                | 16/3         | 0.021           |
| GO:0006817 | Phosphate ion transport                                                             | 17/3         | 0.024           |
| GO:0022011 | Myelination in peripheral nervous system                                            | 17/3         | 0.024           |

|            |                                                                                                           |        |       |
|------------|-----------------------------------------------------------------------------------------------------------|--------|-------|
| GO:0008300 | Isoprenoid catabolic process                                                                              | 7/2    | 0.026 |
| GO:0098887 | Neurotransmitter receptor transport, endosome to postsynaptic membrane                                    | 7/2    | 0.026 |
| GO:0008630 | Intrinsic apoptotic signaling pathway in response to DNA damage                                           | 96/8   | 0.028 |
| GO:0021846 | Cell proliferation in forebrain                                                                           | 18/3   | 0.029 |
| GO:0045056 | Transcytosis                                                                                              | 18/3   | 0.029 |
| GO:0001503 | Ossification                                                                                              | 212/14 | 0.030 |
| GO:0006958 | Complement activation, classical Pathway                                                                  | 32/4   | 0.031 |
| GO:0016226 | Iron-sulfur cluster assembly                                                                              | 19/3   | 0.033 |
| GO:0060349 | Bone morphogenesis                                                                                        | 64/6   | 0.033 |
| GO:0016559 | Peroxisome fission                                                                                        | 8/2    | 0.034 |
| GO:0043653 | Mitochondrial fragmentation involved in apoptotic process                                                 | 8/2    | 0.034 |
| GO:0044597 | Daunorubicin metabolic process                                                                            | 8/2    | 0.034 |
| GO:0044598 | Doxorubicin metabolic process                                                                             | 8/2    | 0.034 |
| GO:0051409 | Response to nitrosative stress                                                                            | 8/2    | 0.034 |
| GO:0090160 | <b>Golgi to lysosomes transport</b>                                                                       | 8/2    | 0.034 |
| GO:0046854 | Phosphatidylinositol phosphorylation                                                                      | 33/4   | 0.034 |
| GO:0050873 | Brown fat cell differentiation                                                                            | 33/4   | 0.034 |
| GO:0009062 | <b>Fatty acid catabolic process</b>                                                                       | 84/8   | 0.036 |
| GO:0009404 | Toxic metabolic process                                                                                   | 20/3   | 0.038 |
| GO:0001519 | Peptide Amidation                                                                                         | 1/1    | 0.038 |
| GO:0001869 | Negative regulation of complement activation, lectin pathway                                              | 1/1    | 0.038 |
| GO:0002037 | Negative regulation of L-glutamate import across plasma membrane                                          | 1/1    | 0.038 |
| GO:0002100 | tRNA wobble adenosine to inosine editing                                                                  | 1/1    | 0.038 |
| GO:0006178 | Guanine salvage                                                                                           | 1/1    | 0.038 |
| GO:0006580 | Ethanolamine metabolic process                                                                            | 1/1    | 0.038 |
| GO:0006583 | Melanin biosynthetic process from tyrosine                                                                | 1/1    | 0.038 |
| GO:0006593 | Ornithine catabolic process                                                                               | 1/1    | 0.038 |
| GO:0007223 | Wnt signaling pathway, calcium modulating Pathway                                                         | 1/1    | 0.038 |
| GO:0008355 | Olfactory learning                                                                                        | 1/1    | 0.038 |
| GO:0009229 | thiamine diphosphate biosynthetic process                                                                 | 1/1    | 0.038 |
| GO:0009231 | Riboflavin biosynthetic process                                                                           | 1/1    | 0.038 |
| GO:0009398 | FMN biosynthetic process                                                                                  | 1/1    | 0.038 |
| GO:0010768 | FMN biosynthetic process                                                                                  | 1/1    | 0.038 |
| GO:0010768 | Negative regulation of transcription from RNA polymerase II promoter in response to UV-induced DNA damage | 1/1    | 0.038 |
| GO:0015862 | Uridine transport                                                                                         | 1/1    | 0.038 |
| GO:0015938 | Coenzyme A catabolic process                                                                              | 1/1    | 0.038 |

|            |                                                                          |     |              |
|------------|--------------------------------------------------------------------------|-----|--------------|
| GO:0018032 | Protein amidation                                                        | 1/1 | 0.038        |
| GO:0019372 | <b>Lipoxygenase pathway</b>                                              | 1/1 | 0.038        |
| GO:0019606 | 2-oxobutyrate catabolic process                                          | 1/1 | 0.038        |
| GO:0021571 | rhombomere 5 development                                                 | 1/1 | 0.038        |
| GO:0021572 | rhombomere 6 development                                                 | 1/1 | 0.038        |
| GO:0021599 | abducens nerve formation                                                 | 1/1 | 0.038        |
| GO:0021633 | optic nerve structural organization                                      | 1/1 | 0.038        |
| GO:0021933 | radial glia guided migration of cerebellar granule cell                  | 1/1 | 0.038        |
| GO:0031460 | glycine betaine transport                                                | 1/1 | 0.038        |
| GO:0032263 | GMP salvage                                                              | 1/1 | 0.038        |
| GO:0033373 | Maintenance of protease location in mast cell secretory granule          | 1/1 | 0.038        |
| GO:0033382 | Maintenance of granzyme B location in T cell secretory granule           | 1/1 | 0.038        |
| GO:0035229 | Positive regulation of glutamate-cysteine ligase activity                | 1/1 | 0.038        |
| GO:0025284 | Brain segmentation                                                       | 1/1 | 0.038        |
| GO:0035750 | Protein localization to myelin sheath abaxonal region                    | 1/1 | 0.038        |
| GO:005863  | dITP catabolic process                                                   | 1/1 | 0.038        |
| GO:0036372 | Opsin transport                                                          | 1/1 | 0.038        |
| GO:0042335 | Cuticle development                                                      | 1/1 | 0.038        |
| GO:0042701 | Progesterone secretion                                                   | 1/1 | 0.038        |
| GO:0043585 | Nose morphogenesis                                                       | 1/1 | 0.038        |
| GO:0045751 | Negative regulation of Toll signaling pathway                            | 1/1 | 0.038        |
| GO:0046963 | 3'-phosphoadenosine 5'-phosphosulfate transport                          | 1/1 | 0.038        |
| GO:0048388 | Endosomal lumen acidification                                            | 1/1 | 0.038        |
| GO:0051977 | <b>Lysophospholipid transport</b>                                        | 1/1 | 0.038        |
| GO:0060035 | Notochord cell development                                               | 1/1 | 0.038        |
| GO:0060112 | Generation of ovulation cycle rhythm                                     | 1/1 | 0.038        |
| GO:0061301 | Cerebellum vasculature morphogenesis                                     | 1/1 | 0.038        |
| GO:0061843 | Sertoli cell barrier remodeling                                          | 1/1 | 0.038        |
| GO:0070267 | Oncosis                                                                  | 1/1 | 0.038        |
| GO:0071240 | Cellular response to food                                                | 1/1 | 0.038        |
| GO:0071395 | Cellular response to jasmonic acid stimulus                              | 1/1 | 0.038        |
| GO:0071420 | Cellular response to histamine                                           | 1/1 | 0.038        |
| GO:0090119 | <b>Vesicle mediated cholesterol transport</b>                            | 1/1 | <b>0.038</b> |
| GO:0090326 | <b>Positive regulation of locomotion involved in locomotory behavior</b> | 1/1 | <b>0.038</b> |
| GO:0097272 | Ammonia homeostasis                                                      | 1/1 | 0.038        |
| GO:0099564 | Modification of synaptic structure, modulating synaptic transmission     | 1/1 | 0.038        |
| GO:0120061 | Negative regulation of gastric emptying                                  | 1/1 | 0.038        |

|            |                                                                                        |             |              |
|------------|----------------------------------------------------------------------------------------|-------------|--------------|
| GO:1901329 | Regulation of odontoblast differentiation                                              | 1/1         | 0.038        |
| GO:1901398 | Regulation of transforming growth factor beta3 activation                              | 1/1         | 0.038        |
| GO:1901639 | XDP catabolic process                                                                  | 1/1         | 0.038        |
| GO:1901835 | Positive regulation of deadenylation-independent decapping of nuclear transcribed mRNA | 1/1         | 0.038        |
| GO:1902340 | Negative regulation of chromosome condensation                                         | 1/1         | 0.038        |
| GO:1902725 | Negative regulation of satellite cell differentiation                                  | 1/1         | 0.038        |
| GO:1902823 | <b>Negative regulation of late endosome to lysosome transport</b>                      | <b>1/1</b>  | <b>0.038</b> |
| GO:1903996 | Negative regulation of non-membrane Spanning protein kinase activity                   | 1/1         | 0.038        |
| GO:1903999 | Negative regulation of eating behavior                                                 | 1/1         | 0.038        |
| GO:1904060 | Negative regulation of locomotor rhythm                                                | 1/1         | 0.038        |
| GO:1904246 | Negative regulation of polynucleotide adenylyltransferase activity                     | 1/1         | 0.038        |
| GO:1904750 | <b>Negative regulation of protein localization to nucleolus</b>                        | <b>1/1</b>  | <b>0.038</b> |
| GO:1905396 | Cellular response to flavonoid                                                         | 1/1         | 0.038        |
| GO:1905524 | Negative regulation of protein autoubiquitination                                      | 1/1         | 0.038        |
| GO:1990511 | piRNA biosynthetic process                                                             | 1/1         | 0.038        |
| GO:2001037 | Positive regulation of tongue muscle cell differentiation                              | 1/1         | 0.038        |
| GO:2001255 | Positive regulation of histone H3-K36 trimethylation                                   | 1/1         | 0.038        |
| GO:2001295 | Malonyl-CoA biosynthetic process                                                       | 1/1         | 0.038        |
| GO:0031644 | Regulation of neurological system process                                              | 84/7        | 0.039        |
| GO:0032233 | <b>Positive regulation of actin filament bundle assembly</b>                           | <b>50/5</b> | <b>0.039</b> |
| GO:0050710 | Negative regulation of cytokine secretion                                              | 35/5        | 0.042        |
| GO:0009064 | Glutamine family amino acid metabolic process                                          | 51/5        | 0.042        |
| GO:0030903 | Notochord development                                                                  | 10/3        | 0.043        |
| GO:0031100 | Animal organ regeneration                                                              | 21/3        | 0.043        |
| GO:0002739 | Regulation of cytokine secretion involved                                              | 9/2         | 0.043        |
| GO:0042403 | Thyroid hormone metabolic process                                                      | 9/2         | 0.043        |
| GO:0051451 | Myoblast migration                                                                     | 9/2         | 0.043        |
| GO:0070278 | Extracellular matrix constituent secretion                                             | 9/2         | 0.043        |
| GO:1902950 | Regulation of dendritic spine maintenance                                              | 9/2         | 0.043        |

Categories highlighted in BOLD reflect examples of pathways related to lipid metabolism, protein localization and transport and actin cytoskeleton.



**Supplementary Table 7. Body Weight and Biochemical Parameters in Male *Ldlr*<sup>-/-</sup> vs. *Ldlr*<sup>-/-</sup>*Diaph1*<sup>-/-</sup> Mice on WD for 16 Weeks**

| <b><u>Parameter</u></b> | <b><u>Mouse Group</u></b>  |                                                         |
|-------------------------|----------------------------|---------------------------------------------------------|
|                         | <i>Ldlr</i> <sup>-/-</sup> | <i>Ldlr</i> <sup>-/-</sup> <i>Diaph1</i> <sup>-/-</sup> |
| Body Weight (g)         | 27.7 ± 0.2 (N=22)          | 26.2 ± 0.2 (N=22); p<0.0001                             |
| Glucose (mg/dL)         | 162.5 ± 3.2 (N=22)         | 157.1 ± 2.5 (N=22); p=0.2000                            |
| Insulin (µg/L)          | 0.85 ± 0.4 (N=9)           | 0.39 ± 0.05 (N=9); p=0.5360                             |
| Glucagon (µg/L)         | 101.8 ± 15 (N=10)          | 85.8 ± 22 (N=11); p=0.1920                              |
| Insulin/Glucagon Ratio  | 0.0075 ± 0.002 (N=9)       | 0.0053 ± 5E-04 (N=9); p=0.7960                          |
| HOMA-IR Index           | 8.3 ± 3.3 (N=9)            | 3.5 ± 0.5 (N=9); p=0.2580                               |

---

Values represent Mean±SEM.

**Supplementary Table 8. Correlation Analysis of the Atherosclerotic Lesion Area and Macrophage/Neutral Lipid Content vs. lipid and other metabolic factors in Male *Ldlr*<sup>-/-</sup> vs. *Ldlr*<sup>-/-</sup>*Diaph1*<sup>-/-</sup> Mice on WD for 16 Weeks**

| <u>Genotype/Variable</u>                                                         | <u>Correlation Coefficient/P-value</u> |            | <u><i>Ldlr</i><sup>-/-</sup> <i>Diaph1</i><sup>-/-</sup> vs. <i>Ldlr</i><sup>-/-</sup></u> |                |
|----------------------------------------------------------------------------------|----------------------------------------|------------|--------------------------------------------------------------------------------------------|----------------|
| A). <u>Atherosclerotic Lesion Area (H&amp;E) vs. Neutral Lipid Content (ORO)</u> |                                        |            | <u>Change in slope</u>                                                                     | <u>P-value</u> |
| <i>Ldlr</i> <sup>-/-</sup>                                                       | 0.80                                   | p= 0.0057  |                                                                                            |                |
| <i>Ldlr</i> <sup>-/-</sup> <i>Diaph1</i> <sup>-/-</sup>                          | 0.84                                   | p= 0.0026  | -7,418 $\mu\text{m}^2$ / %                                                                 | 0.15           |
| B). <u>Atherosclerotic Lesion Area (H&amp;E) vs. Macrophage Content (CD68)</u>   |                                        |            |                                                                                            |                |
| <i>Ldlr</i> <sup>-/-</sup>                                                       | 0.93                                   | p=0.00028  |                                                                                            |                |
| <i>Ldlr</i> <sup>-/-</sup> <i>Diaph1</i> <sup>-/-</sup>                          | 0.78                                   | p= 0.0134  | -5,953 $\mu\text{m}^2$ / %                                                                 | 0.19           |
| C). <u>Macrophage Content (CD68) vs. Neutral Lipid Content (ORO)</u>             |                                        |            |                                                                                            |                |
| <i>Ldlr</i> <sup>-/-</sup>                                                       | 0.93                                   | p=0.0003   |                                                                                            |                |
| <i>Ldlr</i> <sup>-/-</sup> <i>Diaph1</i> <sup>-/-</sup>                          | 0.82                                   | p= 0.0068  | -0.16 %/%                                                                                  | 0.54           |
| D). <u>Atherosclerotic Lesion Area (H&amp;E) vs. Plasma Cholesterol</u>          |                                        |            |                                                                                            |                |
| <i>Ldlr</i> <sup>-/-</sup>                                                       | 0.83                                   | p=0.0030   |                                                                                            |                |
| <i>Ldlr</i> <sup>-/-</sup> <i>Diaph1</i> <sup>-/-</sup>                          | 0.86                                   | p=0.0014   | <b>-271 <math>\mu\text{m}^2</math> / mg/dl</b>                                             | <b>0.0082</b>  |
| E). <u>Neutral Lipid Content (ORO) vs. Plasma Cholesterol</u>                    |                                        |            |                                                                                            |                |
| <i>Ldlr</i> <sup>-/-</sup>                                                       | 0.93                                   | p<0.0001   |                                                                                            |                |
| <i>Ldlr</i> <sup>-/-</sup> <i>Diaph1</i> <sup>-/-</sup>                          | 0.97                                   | p<0.0001   | -0.008 %/ mg/dL                                                                            | 0.017          |
| F). <u>Macrophage Content (CD68) vs. Plasma Cholesterol</u>                      |                                        |            |                                                                                            |                |
| <i>Ldlr</i> <sup>-/-</sup>                                                       | 0.84                                   | p= 0.0048  |                                                                                            |                |
| <i>Ldlr</i> <sup>-/-</sup> <i>Diaph1</i> <sup>-/-</sup>                          | 0.92                                   | p= 0.00038 | -0.01 %/ mg/dL                                                                             | 0.053          |
| G). <u>Atherosclerotic Lesion Area (H&amp;E) vs. Plasma Triglyceride</u>         |                                        |            |                                                                                            |                |
| <i>Ldlr</i> <sup>-/-</sup>                                                       | 0.53                                   | p= 0.1117  |                                                                                            |                |
| <i>Ldlr</i> <sup>-/-</sup> <i>Diaph1</i> <sup>-/-</sup>                          | 0.0183                                 | p= 0.96    | -80 $\mu\text{m}^2$ /mg/dL                                                                 | 0.56           |
| H). <u>Neutral Lipid Content (ORO) vs Plasma Triglyceride</u>                    |                                        |            |                                                                                            |                |
| <i>Ldlr</i> <sup>-/-</sup>                                                       | 0.51                                   | p= 0.1326  |                                                                                            |                |
| <i>Ldlr</i> <sup>-/-</sup> <i>Diaph1</i> <sup>-/-</sup>                          | 0.22                                   | p= 0.5498  | 0.012 %/mg/dL                                                                              | 0.14           |
| I). <u>Macrophage Content (CD68) vs Plasma Triglyceride</u>                      |                                        |            |                                                                                            |                |
| <i>Ldlr</i> <sup>-/-</sup>                                                       | 0.36                                   | p= 0.3371  |                                                                                            |                |
| <i>Ldlr</i> <sup>-/-</sup> <i>Diaph1</i> <sup>-/-</sup>                          | 0.10                                   | p= 0.7924  | 0.0034 %/mg/dL                                                                             | 0.63           |
| J). <u>Atherosclerotic Lesion Area (H&amp;E) vs. Plasma Glucose</u>              |                                        |            |                                                                                            |                |
| <i>Ldlr</i> <sup>-/-</sup>                                                       | -0.09                                  | p=0.80     |                                                                                            |                |
| <i>Ldlr</i> <sup>-/-</sup> <i>Diaph1</i> <sup>-/-</sup>                          | 0.37                                   | p= 0.29    | 969 $\mu\text{m}^2$ / mg/dl                                                                | 0.58           |
| K). <u>Atherosclerotic Lesion Area (H&amp;E) vs. Serum Insulin</u>               |                                        |            |                                                                                            |                |
| <i>Ldlr</i> <sup>-/-</sup>                                                       | -0.43                                  | p= 0.21    |                                                                                            |                |
| <i>Ldlr</i> <sup>-/-</sup> <i>Diaph1</i> <sup>-/-</sup>                          | -0.35                                  | p=0.32     | -15,869 $\mu\text{m}^2$ / $\mu\text{g/L}$                                                  | 0.84           |

**Supplementary Table 9. Correlation Analysis of the Atherosclerotic Lesion Area vs. lipid and glucose-related factors in Female *Ldlr*<sup>-/-</sup> vs. *Ldlr*<sup>-/-</sup>*Diaph1*<sup>-/-</sup> Mice on WD for 16 Weeks**

| <u>Genotype/Variable</u>                                                 | <u>Correlation Coefficient/P-value</u> |           | <u><i>Ldlr</i><sup>-/-</sup> <i>Diaph1</i><sup>-/-</sup> vs. <i>Ldlr</i><sup>-/-</sup></u> |                |
|--------------------------------------------------------------------------|----------------------------------------|-----------|--------------------------------------------------------------------------------------------|----------------|
| A). <u>Atherosclerotic Lesion Area (H&amp;E) vs. Plasma Cholesterol</u>  |                                        |           | <u>Change in slope</u>                                                                     | <u>P-value</u> |
| <i>Ldlr</i> <sup>-/-</sup>                                               | -0.12                                  | p=0.7755  |                                                                                            |                |
| <i>Ldlr</i> <sup>-/-</sup> <i>Diaph1</i> <sup>-/-</sup>                  | 0.70                                   | p=0.0364  | <b>2,070 <math>\mu\text{m}^2</math>/ mg/dl</b>                                             | <b>0.0224</b>  |
| B). <u>Atherosclerotic Lesion Area (H&amp;E) vs. Plasma Triglyceride</u> |                                        |           |                                                                                            |                |
| <i>Ldlr</i> <sup>-/-</sup>                                               | 0.003                                  | p= 0.9948 |                                                                                            |                |
| <i>Ldlr</i> <sup>-/-</sup> <i>Diaph1</i> <sup>-/-</sup>                  | 0.20                                   | p= 0.6105 | 1,150 $\mu\text{m}^2$ /mg/dL                                                               | 0.6316         |
| C). <u>Atherosclerotic Lesion Area (H&amp;E) vs. Plasma Glucose</u>      |                                        |           |                                                                                            |                |
| <i>Ldlr</i> <sup>-/-</sup>                                               | -0.05                                  | p=0.8955  |                                                                                            |                |
| <i>Ldlr</i> <sup>-/-</sup> <i>Diaph1</i> <sup>-/-</sup>                  | 0.43                                   | p=0.2522  | 4,457 $\mu\text{m}^2$ / mg/dl                                                              | 0.2417         |
