# Supplementary material for: DIAPH1 mediates progression of atherosclerosis and regulates hepatic lipid metabolism in mice
Source: PubMed Central journal article supplement (PMC10023694; doi:10.1038/s42003-023-04643-2), 2023-03-17
Supplement: 42003_2023_4643_MOESM2_ESM.pdf [file 42003_2023_4643_MOESM2_ESM.pdf]

## Description of Additional Supplementary Files

**File name:** Supplementary Data 1

**Description:** Source data behind graphs in main manuscript

**File name:** Supplementary Data 2

**Description:** Source data behind graphs in supplementary file

**File name:** Supplementary Data 3

**Description:** Uncropped blots for Figure 5A-C, Figure 6A-F, Figure 8A-B, Sup Figure 7A-C, Sup Figure 9A-E, Sup Figure 10A-C

**File name:** Supplementary Data 4

**Description:** Uncropped blots for Figure 5D.

**File name:** Supplementary Data 5

**Description:** Uncropped blots for Figure 8C

**File name:** Supplementary Data 6

**Description:** Differentially expressed genes in *Ldlr*<sup>-/-</sup>*Diaph1*<sup>-/-</sup> vs. *Ldlr*<sup>-/-</sup> with FDR < 0.05
