# Supplementary material for: DIAPH1 mediates progression of atherosclerosis and regulates hepatic lipid metabolism in mice
Source: PubMed Central journal article supplement (PMC10023694; doi:10.1038/s42003-023-04643-2), 2023-03-17
Supplement: 42003_2023_4643_MOESM5_ESM.pdf [file 42003_2023_4643_MOESM5_ESM.pdf]

# Figure 5A-B-C

# Exp. Code: 062-4-FRACTIONATION in livers

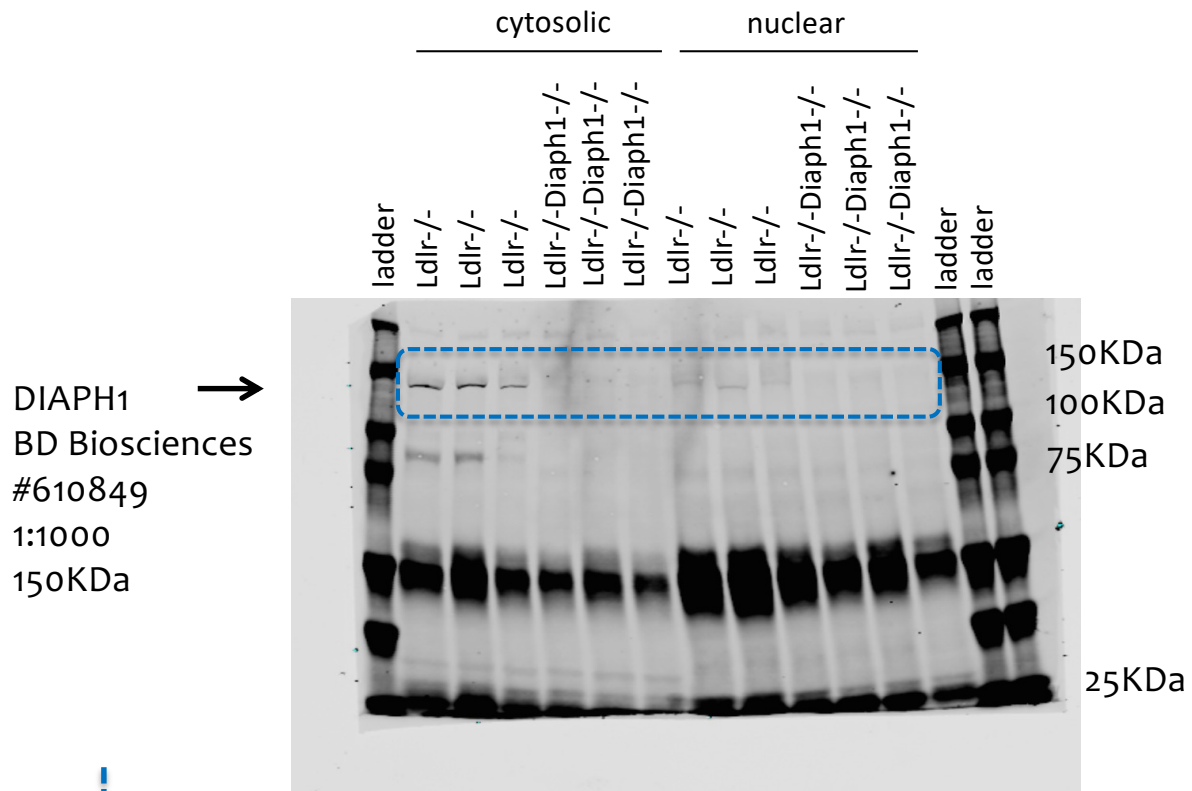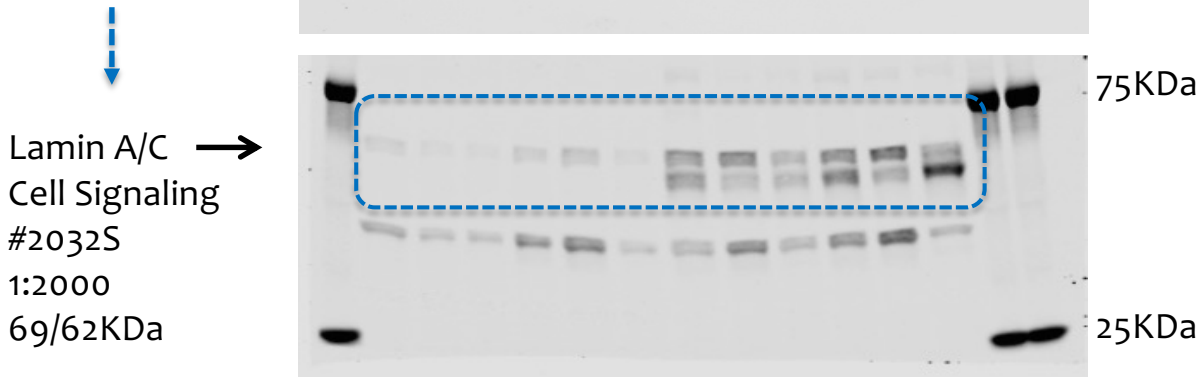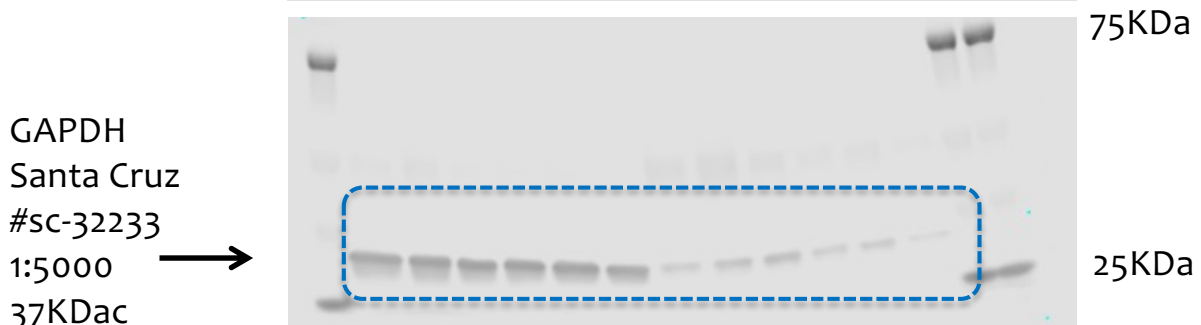

stripped →

cropped for figure 5A

7.5% Acrylamide

Ldlr-/- cytosolic and nuclear n=3

Ldlr-/-Diaph1-/- cytosolic and nuclear n=3

# Exp. Code: 062-1-FRACTIONATION in livers

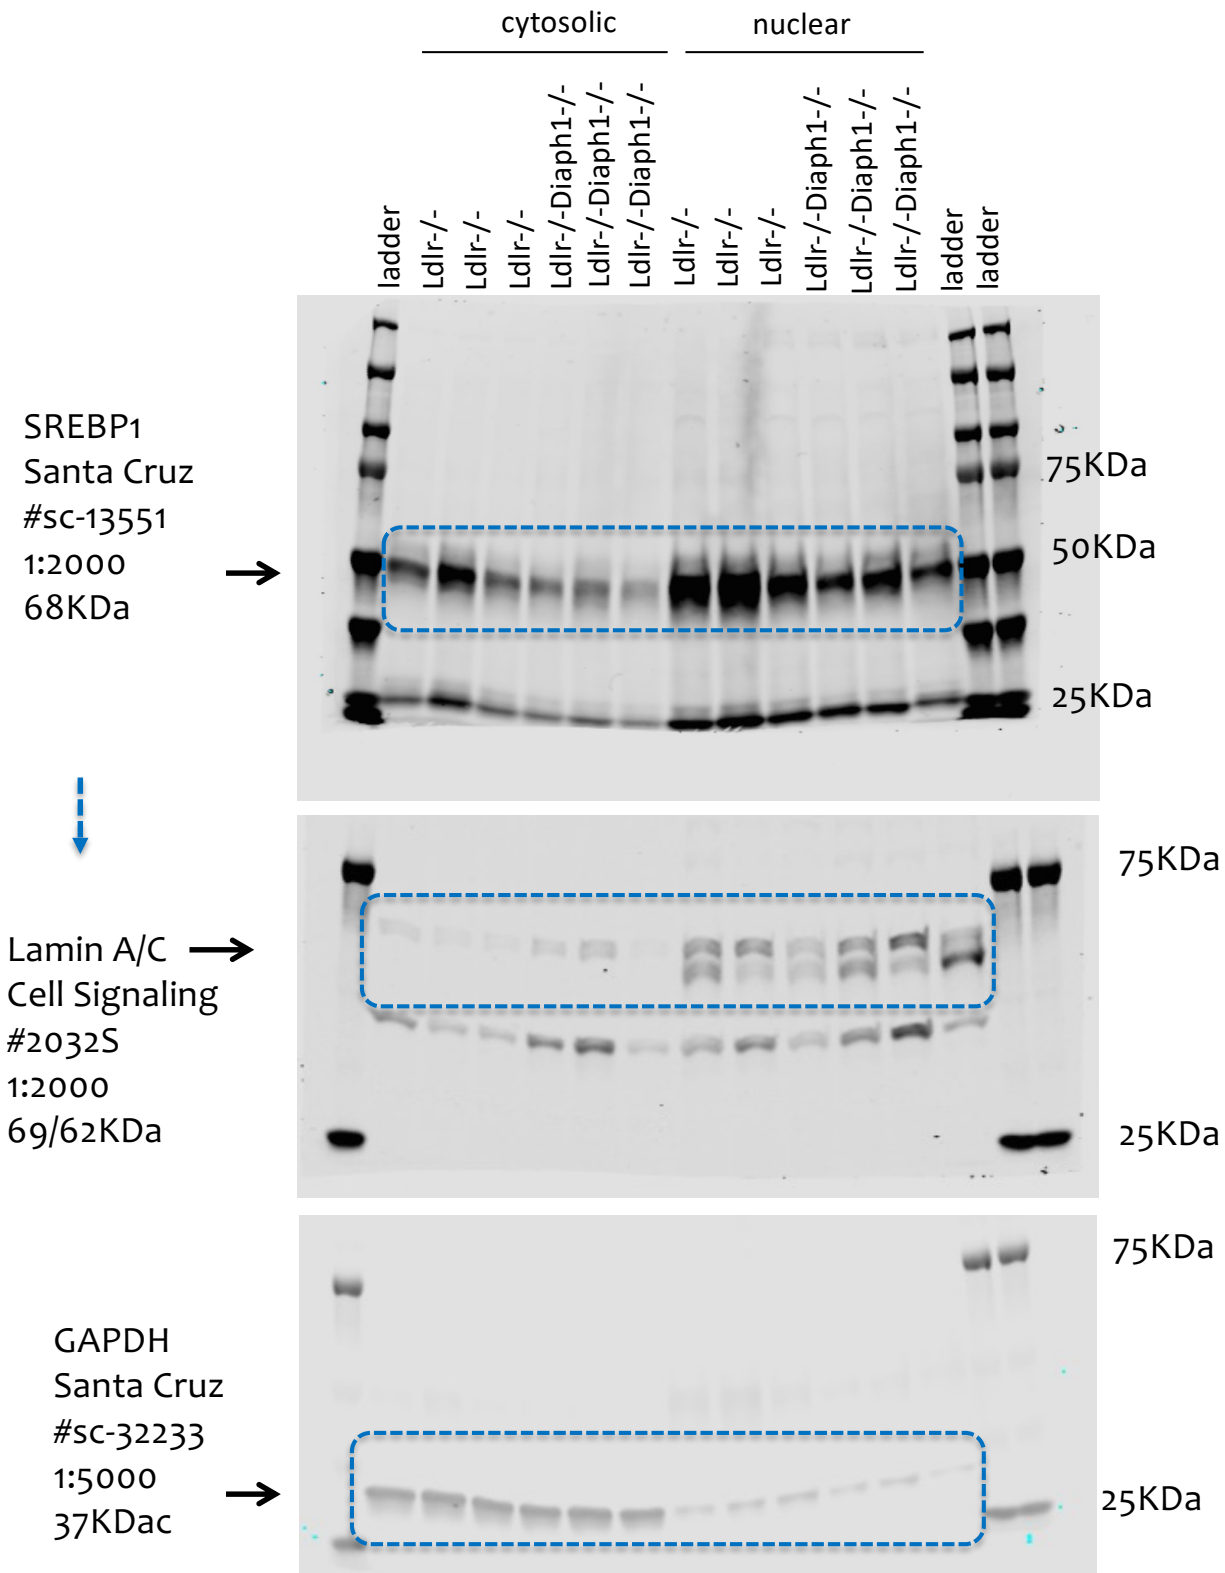

stripped →

cropped for figure 5A

7.5% Acrylamide  
Ldlr-/- cytosolic and nuclear n=3  
Ldlr-/-Diaph1-/- cytosolic and nuclear n=3

# Exp. Code: 062-2-FRACTIONATION in livers

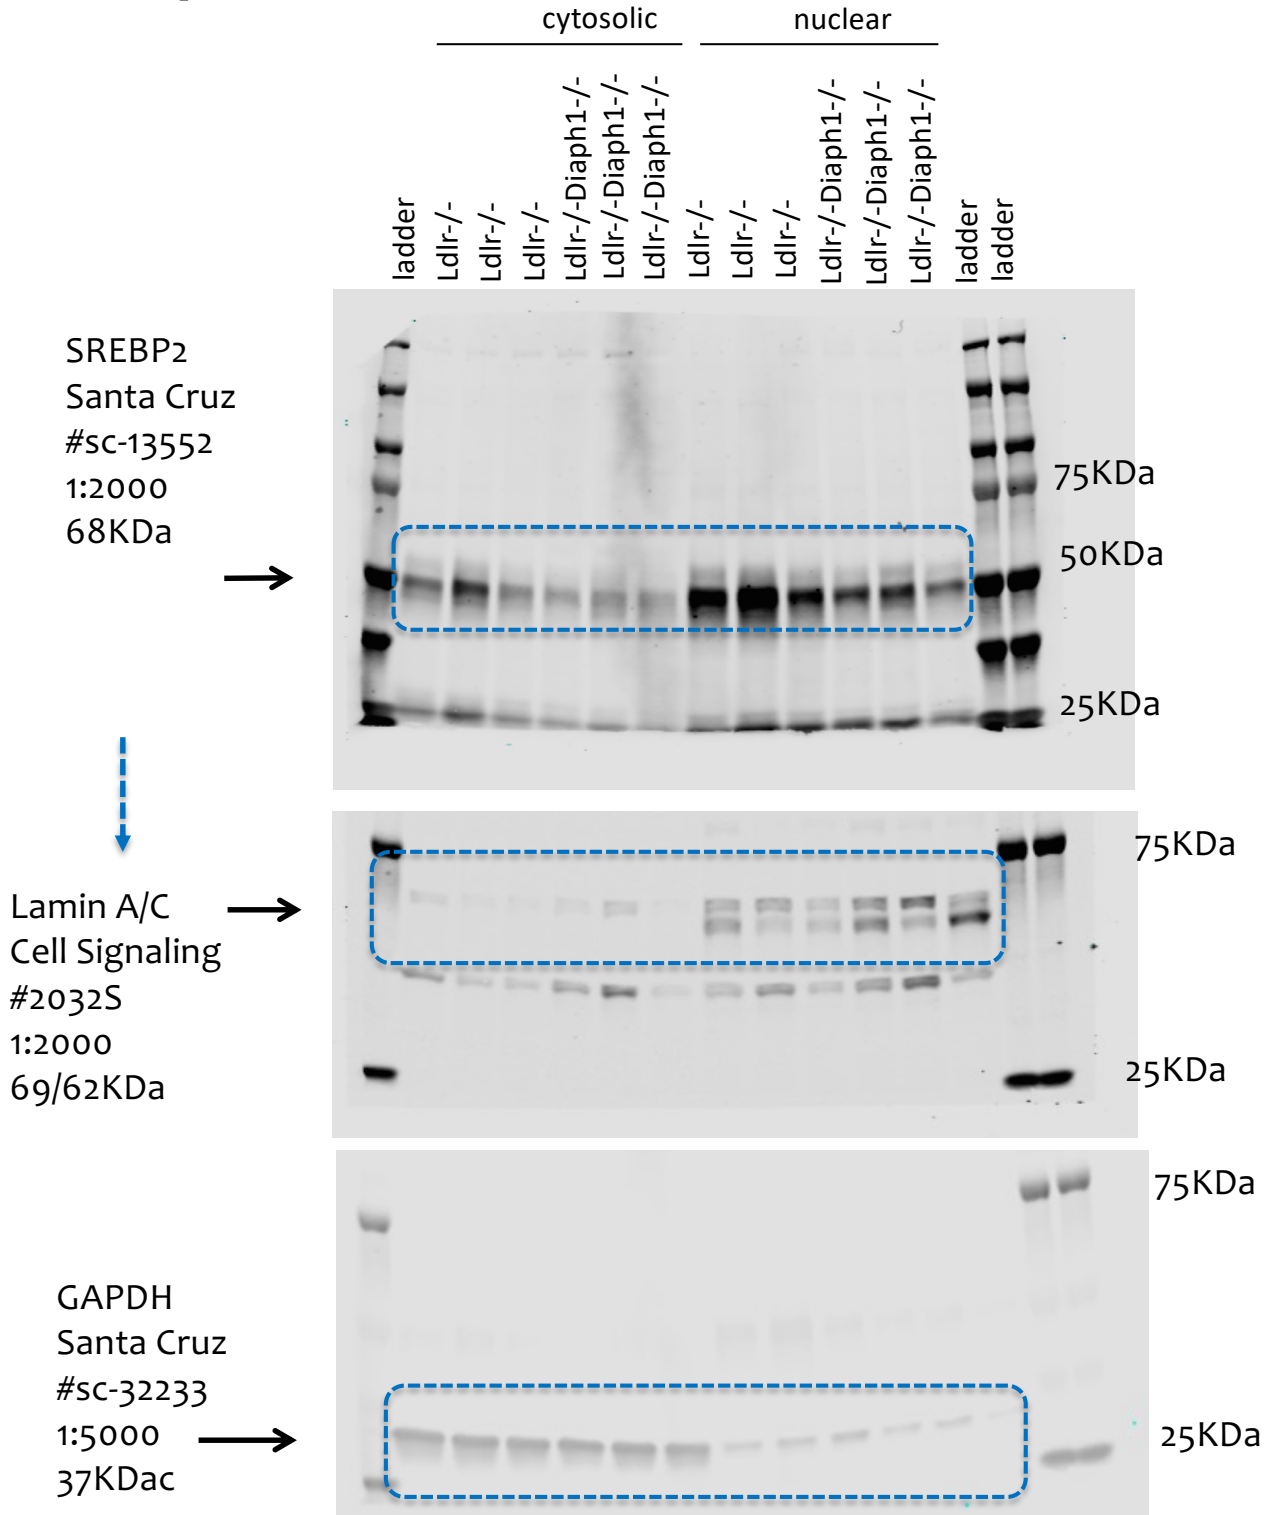

stripped

cropped for figure 5A

7.5% Acrylamide

Ldlr<sup>-/-</sup> cytosolic and nuclear n=3

Ldlr<sup>-/-</sup>-Diaph1<sup>-/-</sup> cytosolic and nuclear n=3

# Exp. Code: 062-3-FRACTIONATION in livers

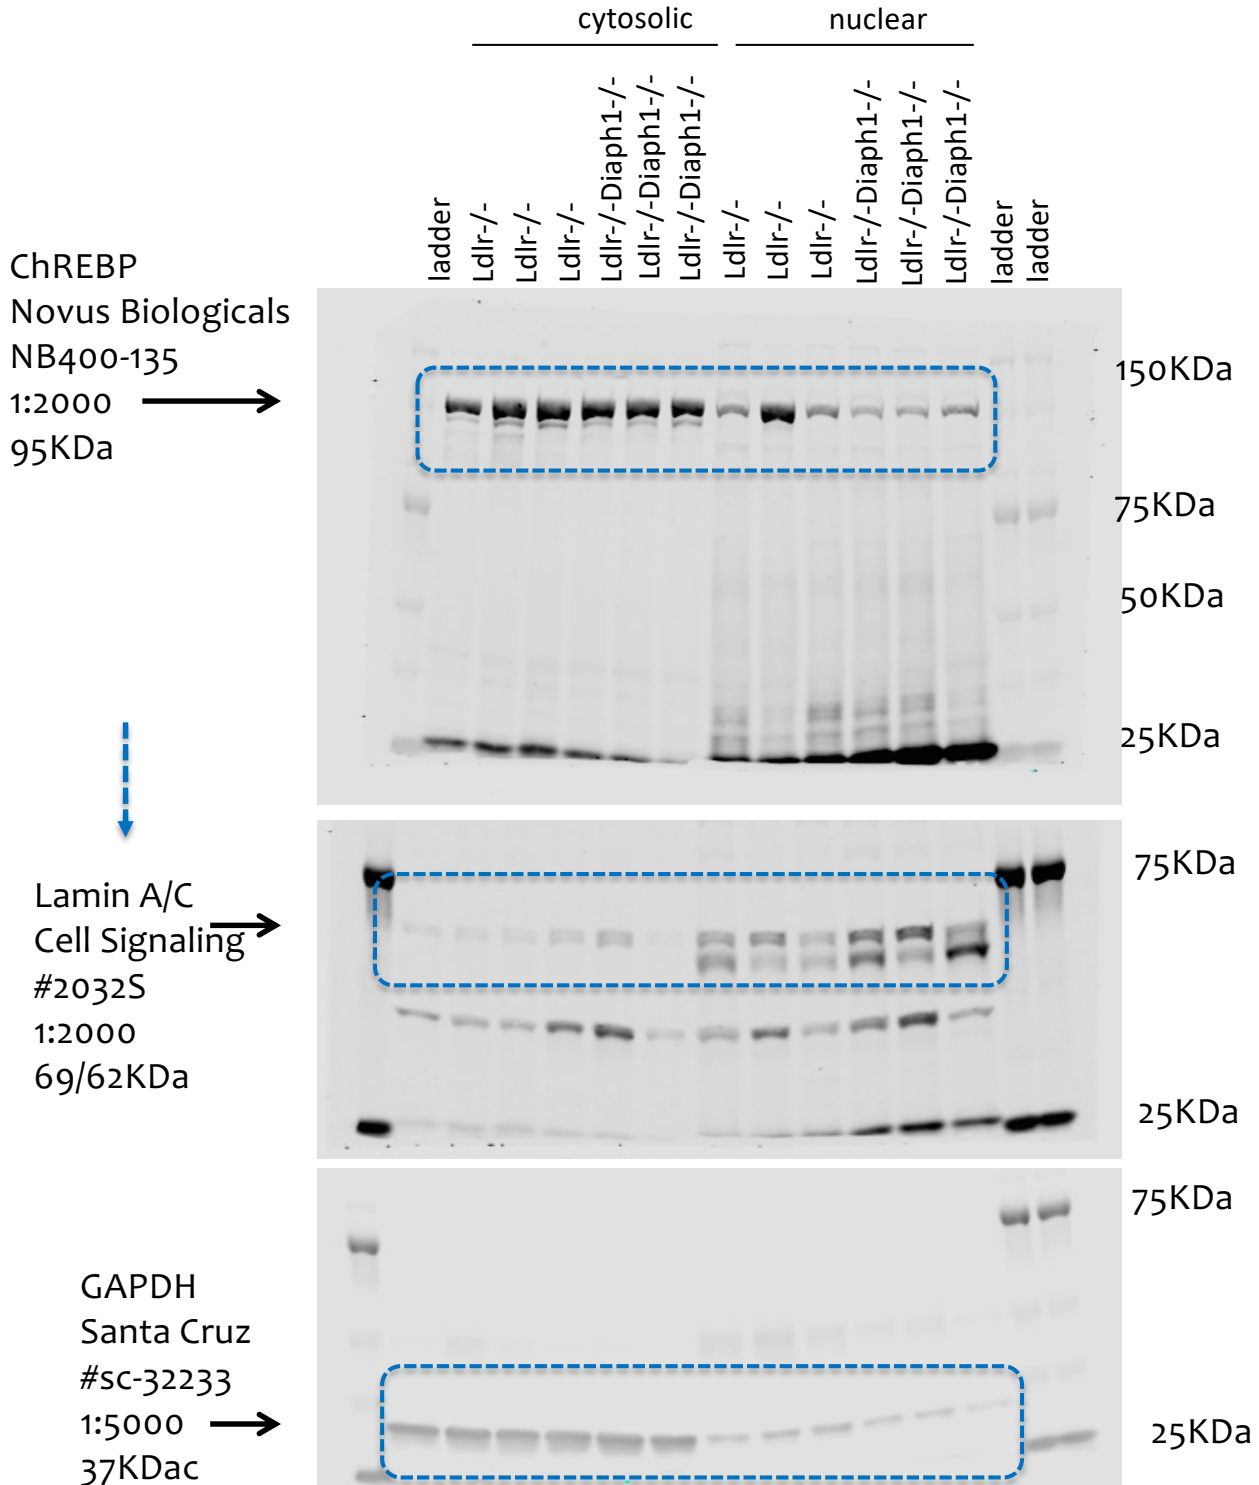

stripped →

cropped for figure 5A

7.5% Acrylamide

Ldlr<sup>-/-</sup> cytosolic and nuclear n=3

Ldlr<sup>-/-</sup>-Diaph1<sup>-/-</sup> cytosolic and nuclear n=3

# Exp. Code: 061-8-FRACTIONATION in livers

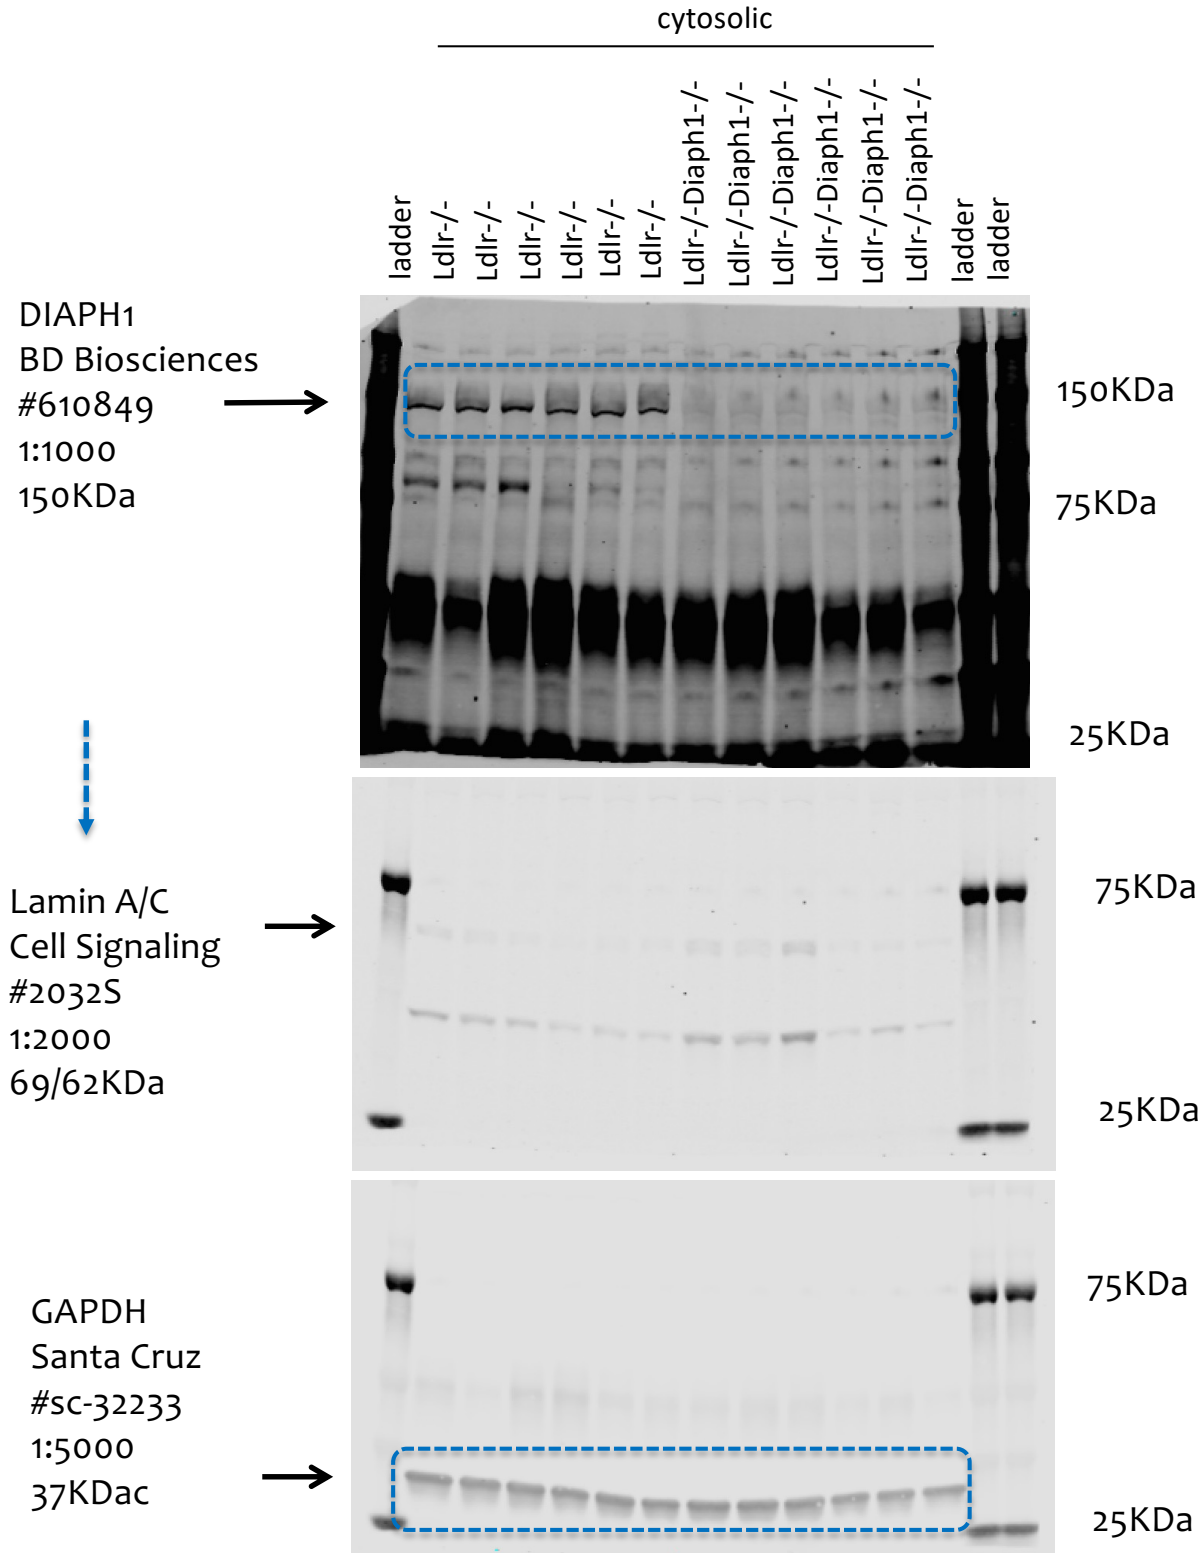

stripped

quantified in figure 5B

7.5% Acrylamide

Ldlr<sup>-/-</sup> cytosolic n=6

Ldlr<sup>-/-</sup>-Diaph1<sup>-/-</sup> cytosolic n=6

# Exp. Code: 061-5-FRACTIONATION in livers

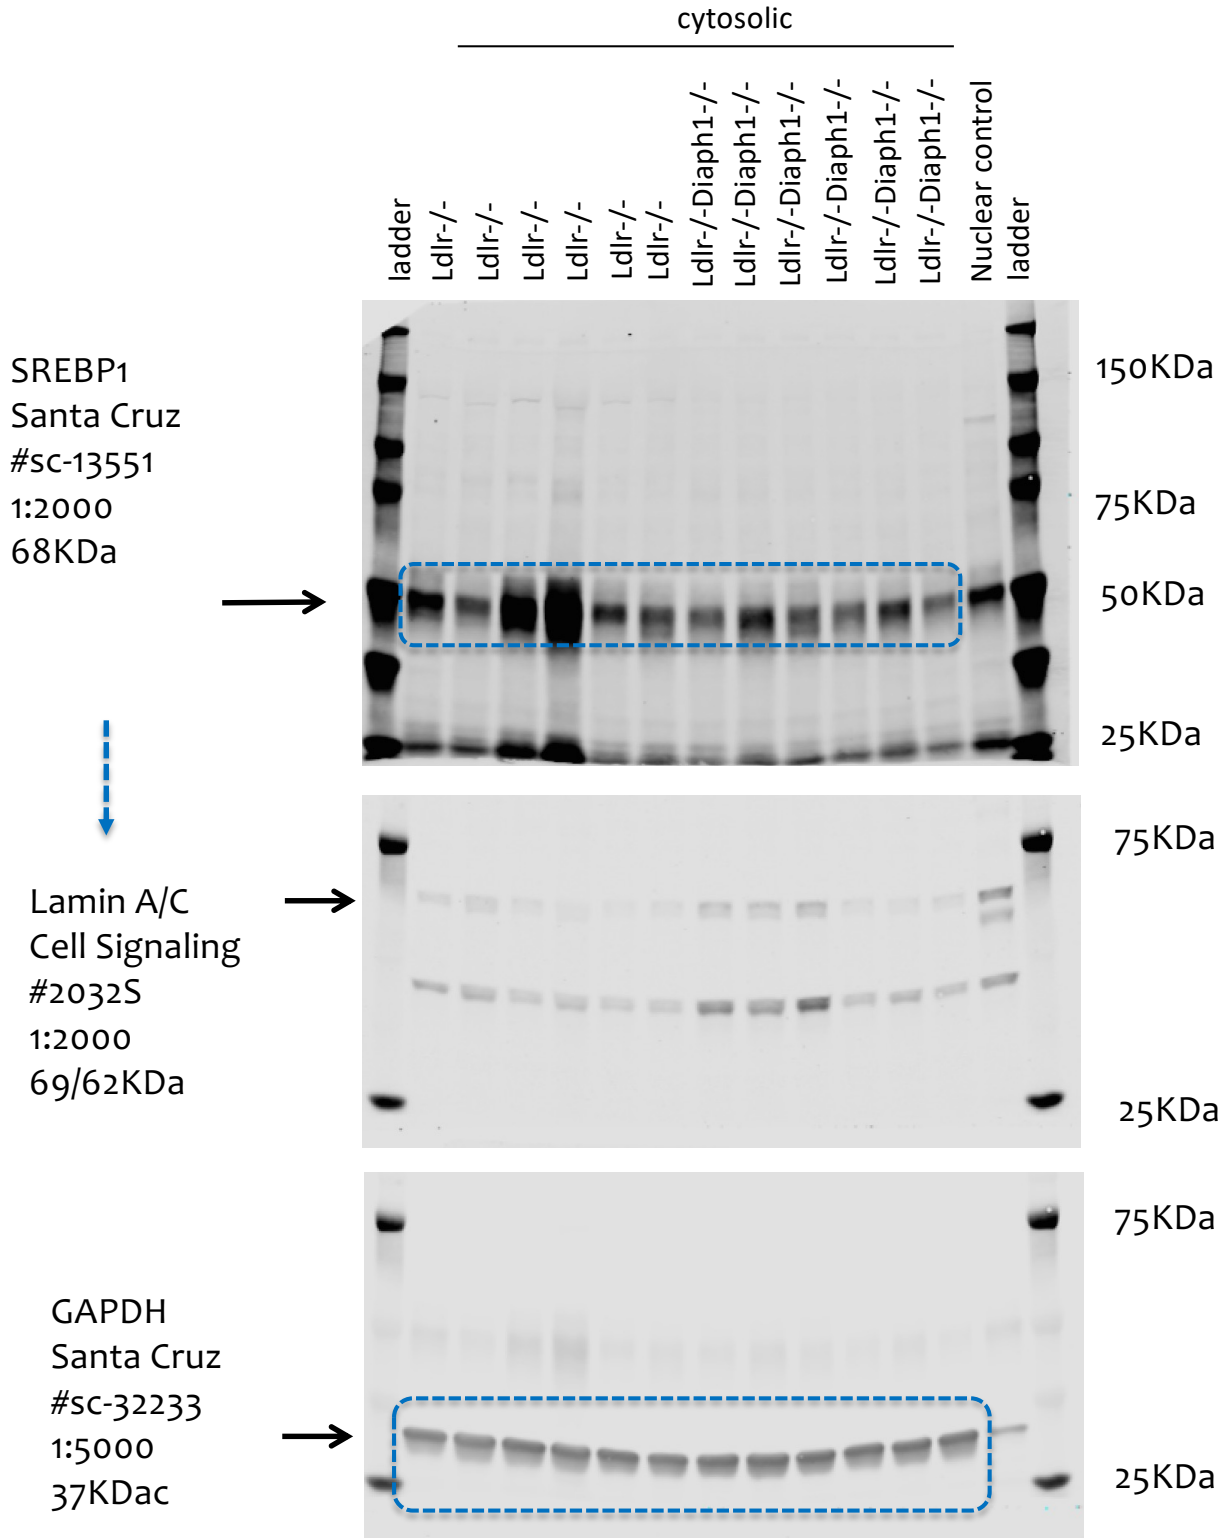

stripped

quantified in figure 5B

7.5% Acrylamide

Ldlr<sup>-/-</sup> cytosolic n=6

Ldlr<sup>-/-</sup>-Diaph1<sup>-/-</sup> cytosolic n=6

# Exp. Code: 061-6-FRACTIONATION in livers

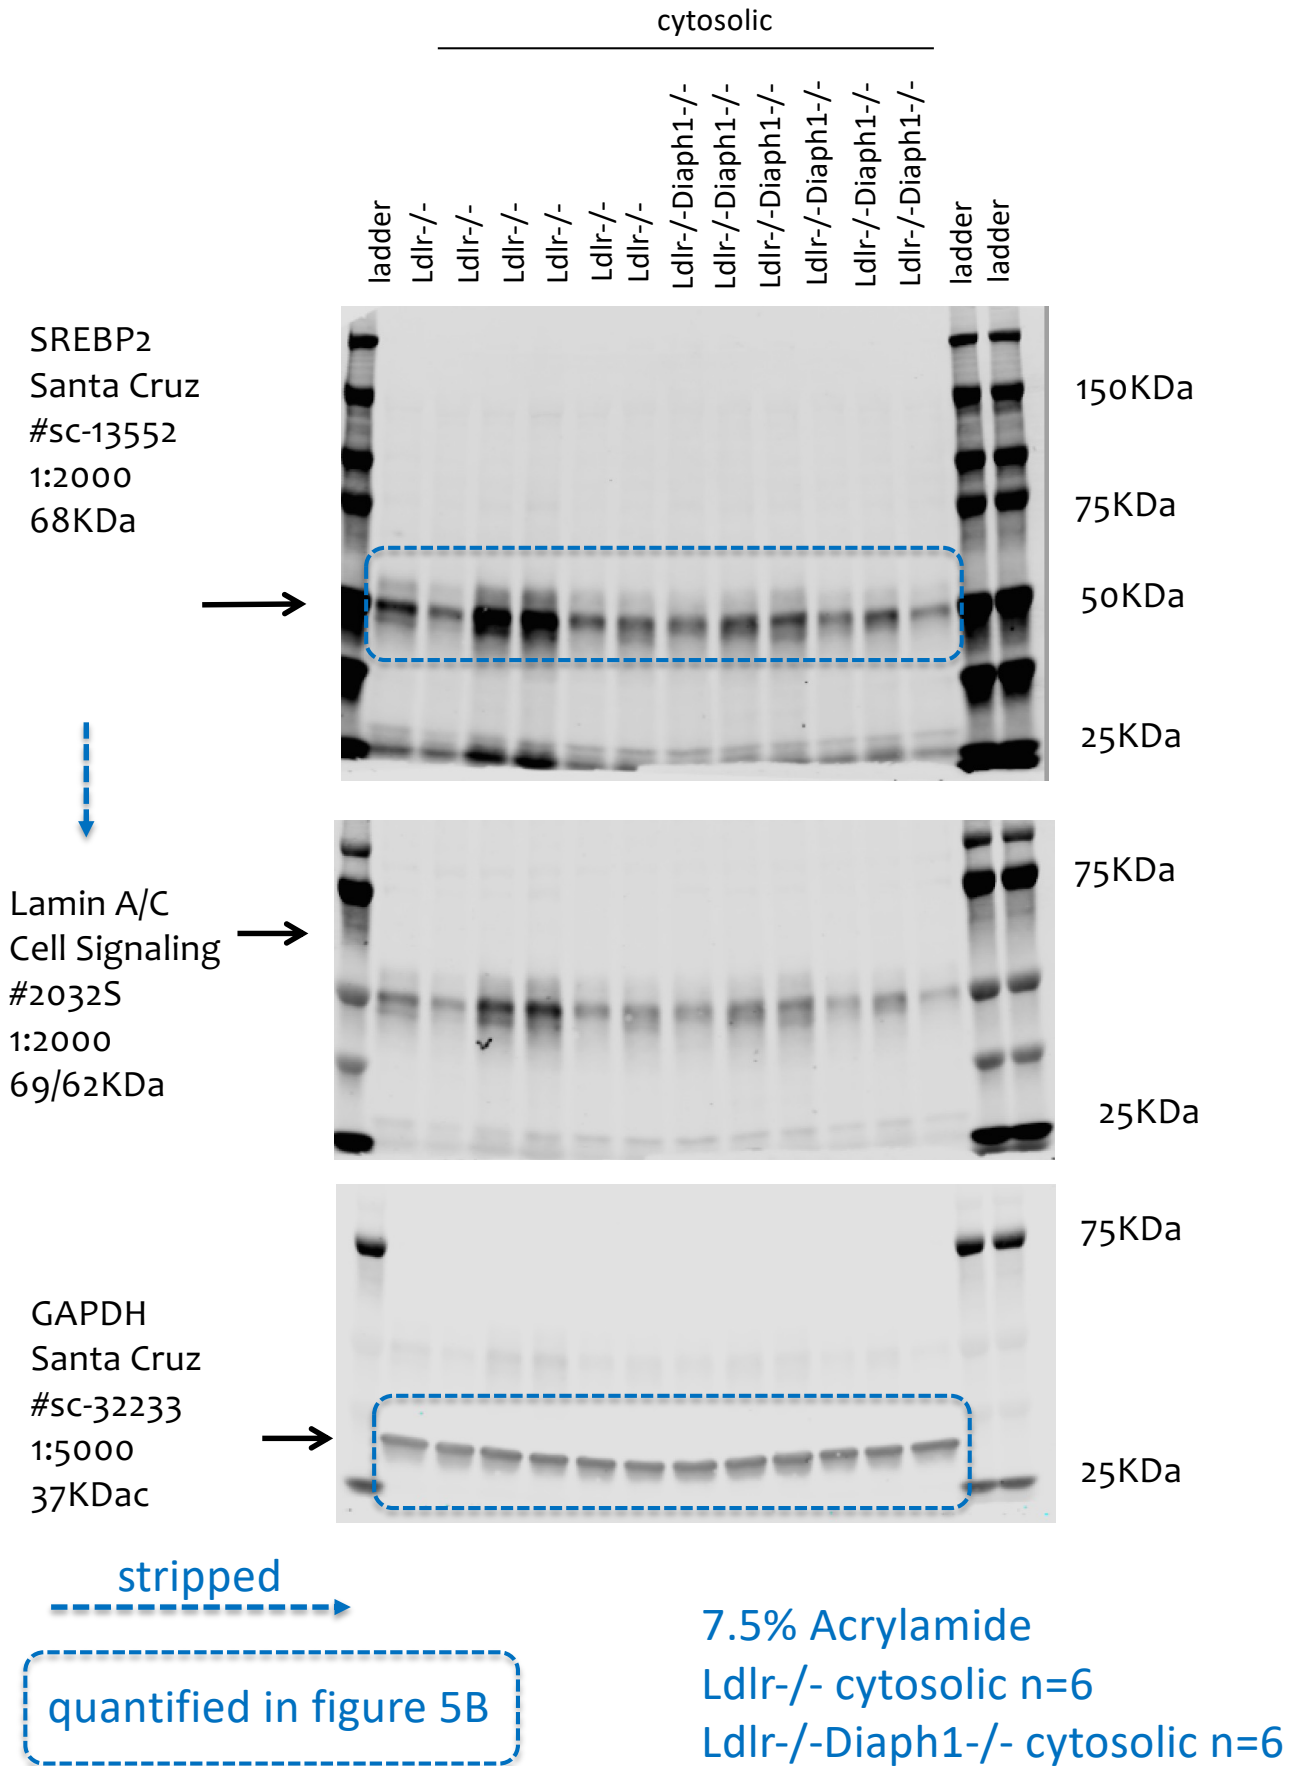



# Exp. Code: 061-7-FRACTIONATION in livers

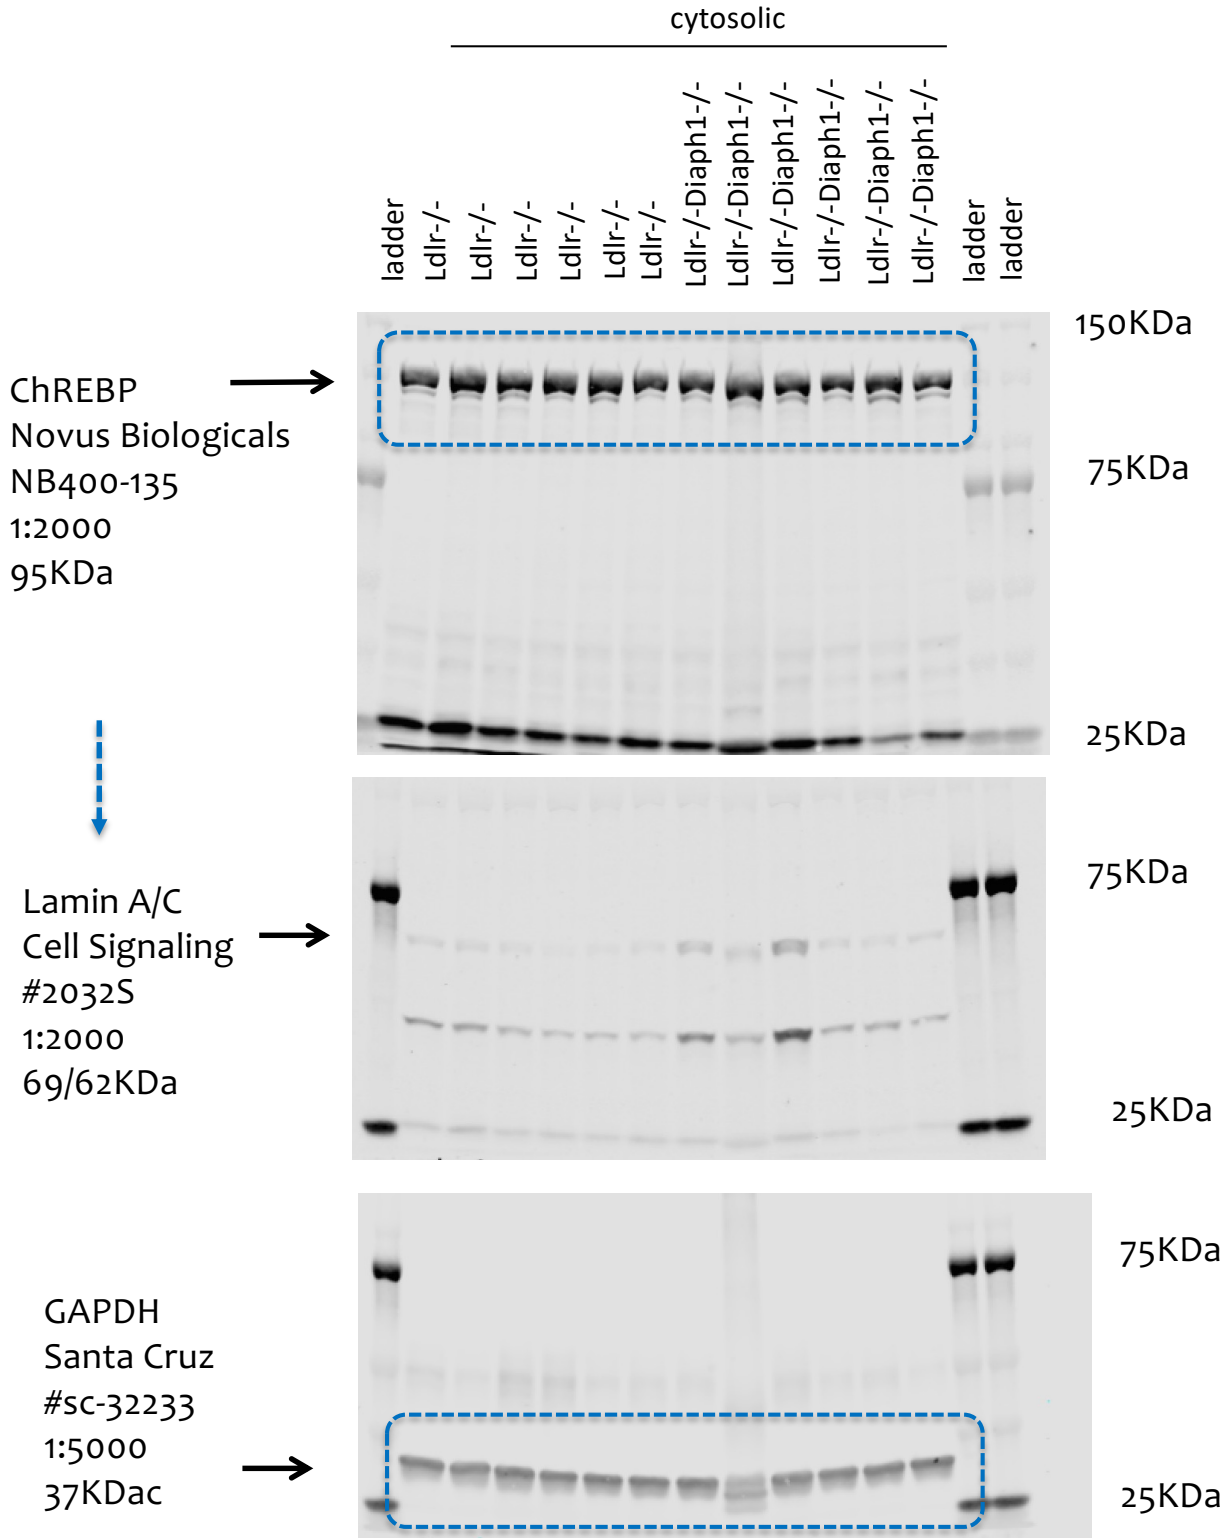

stripped

quantified in figure 5B

7.5% Acrylamide

Ldlr<sup>-/-</sup> cytosolic n=6

Ldlr<sup>-/-</sup>Diaph1<sup>-/-</sup> cytosolic n=6

# Exp. Code: 061-4-FRACTIONATION in livers

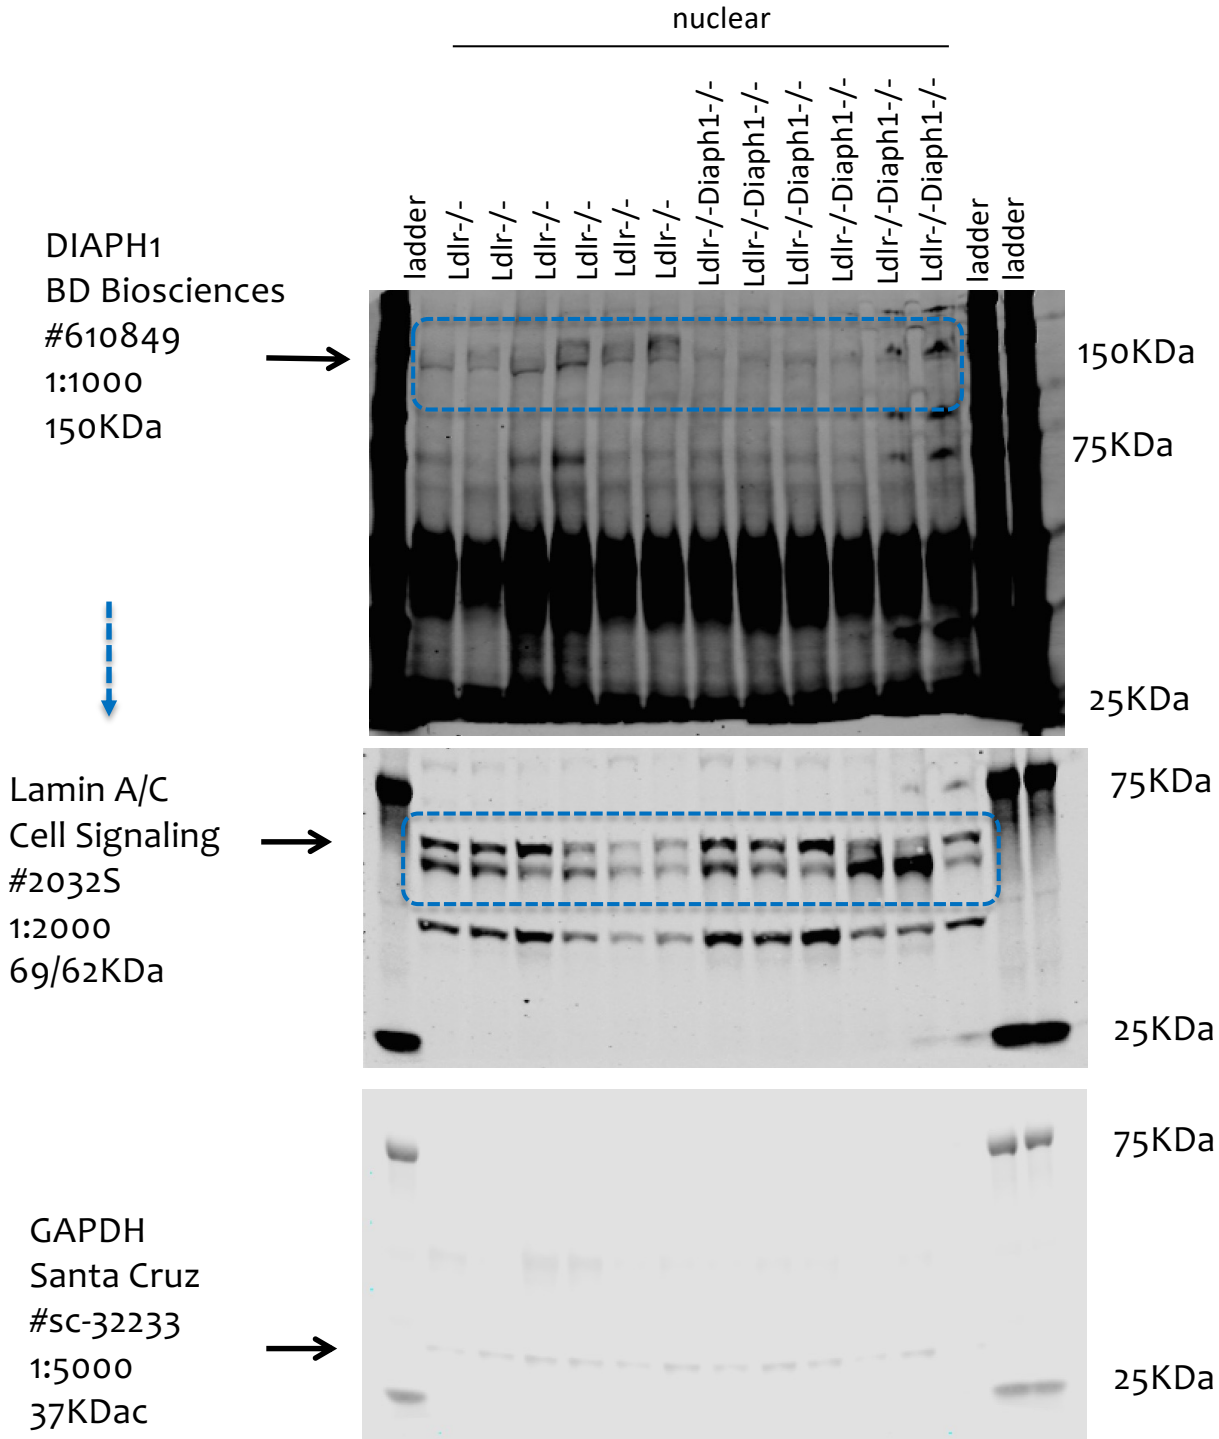

stripped

quantified in figure 5C

7.5% Acrylamide

Ldlr-/- nuclear n=6

Ldlr-/-Diaph1-/- nuclear n=6

# Exp. Code: 061-1-FRACTIONATION in livers

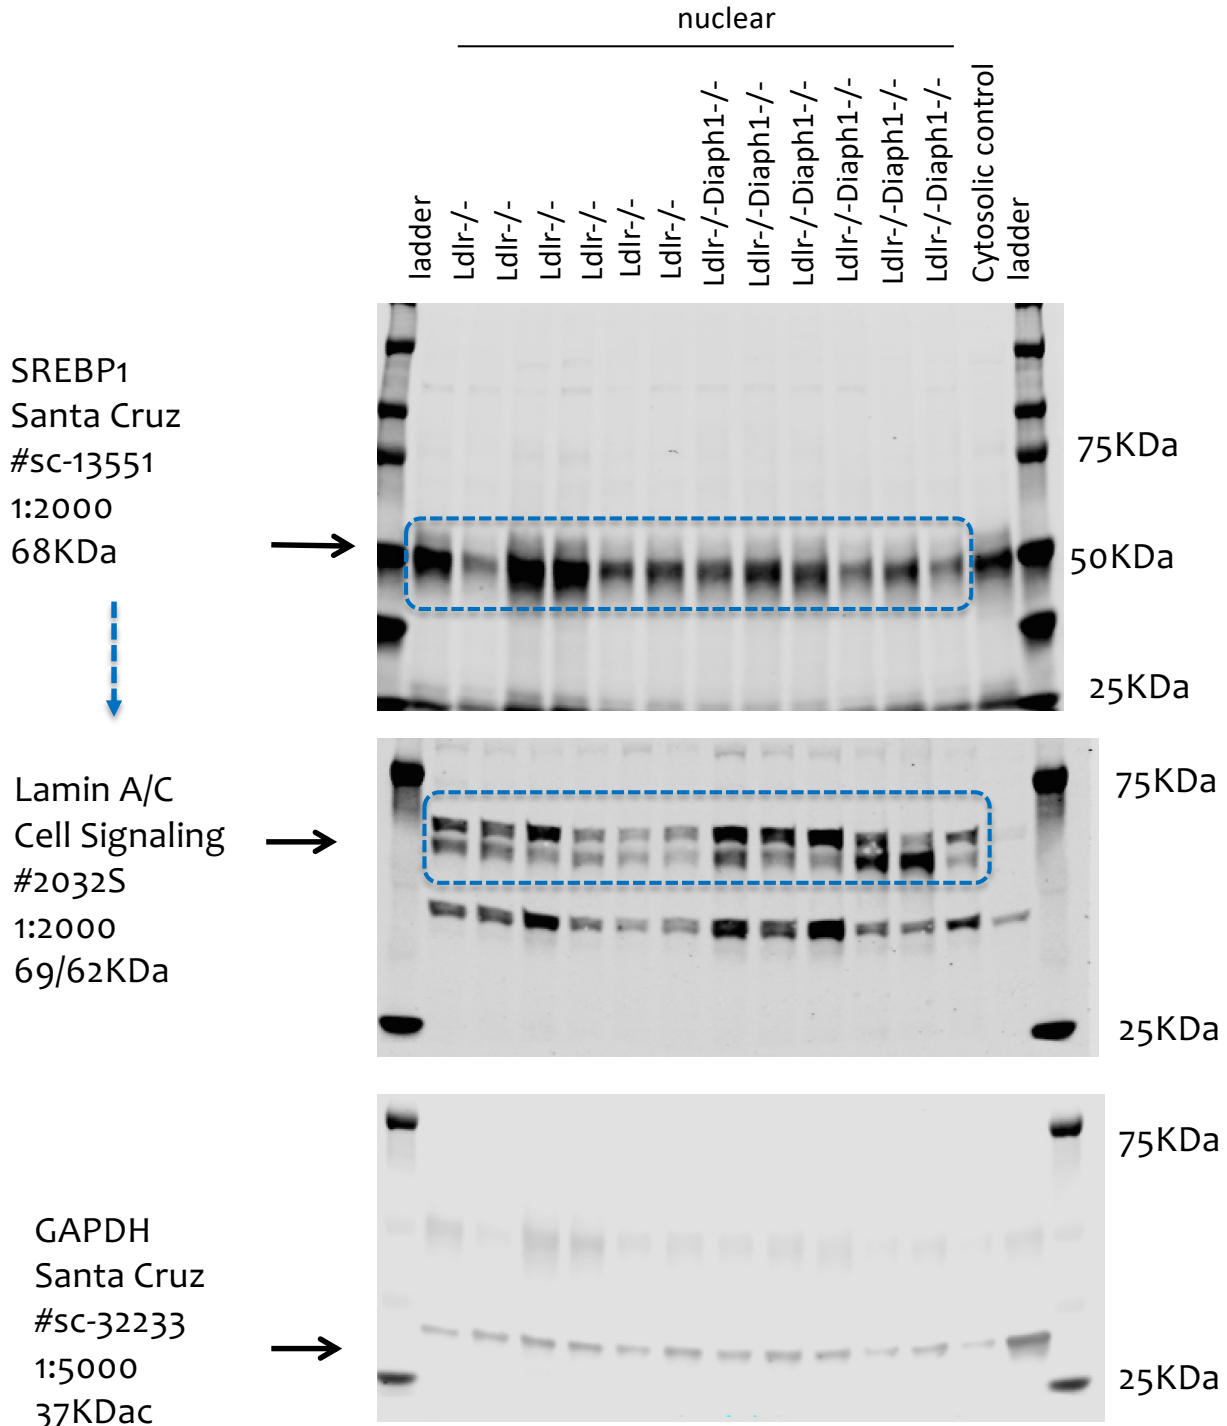

stripped

quantified in figure 5C

7.5% Acrylamide

Ldlr<sup>-/-</sup> nuclear n=6

Ldlr<sup>-/-</sup>Diaph1<sup>-/-</sup> nuclear n=6

# Exp. Code: 061-2-FRACTIONATION in livers

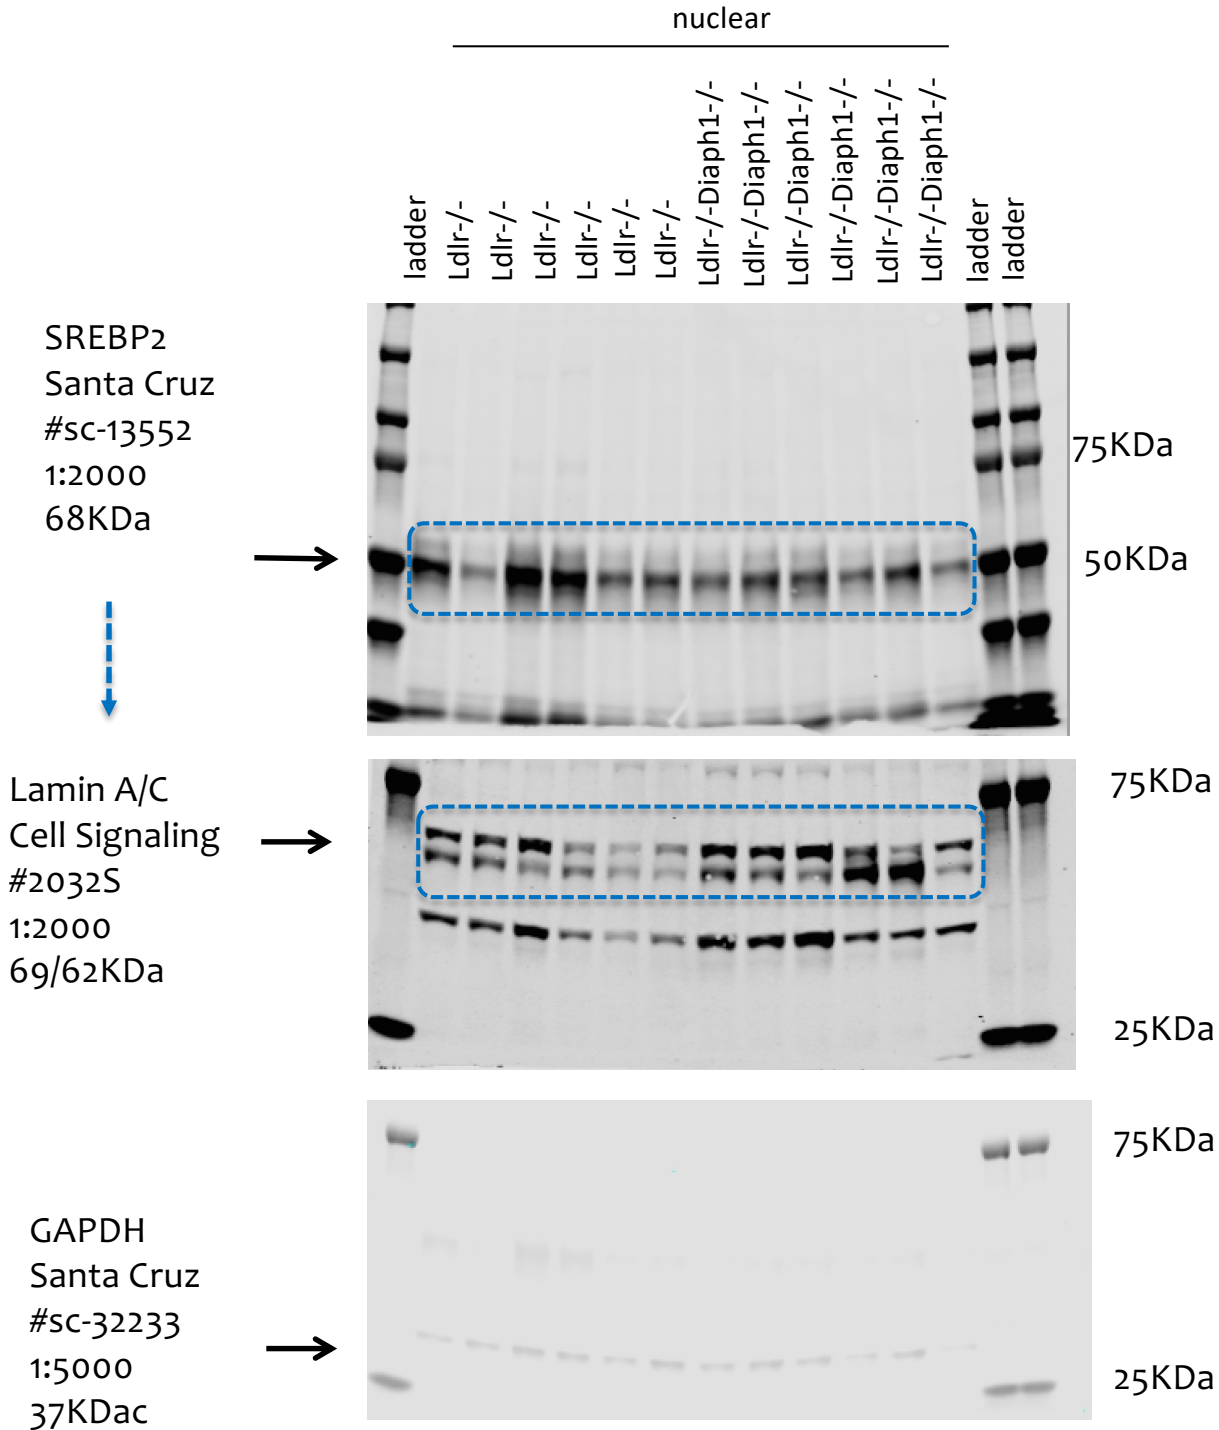

stripped

quantified in figure 5C

7.5% Acrylamide

Ldlr-/- nuclear n=6

Ldlr-/-Diaph1-/- nuclear n=6

# Exp. Code: 061-3-FRACTIONATION in livers

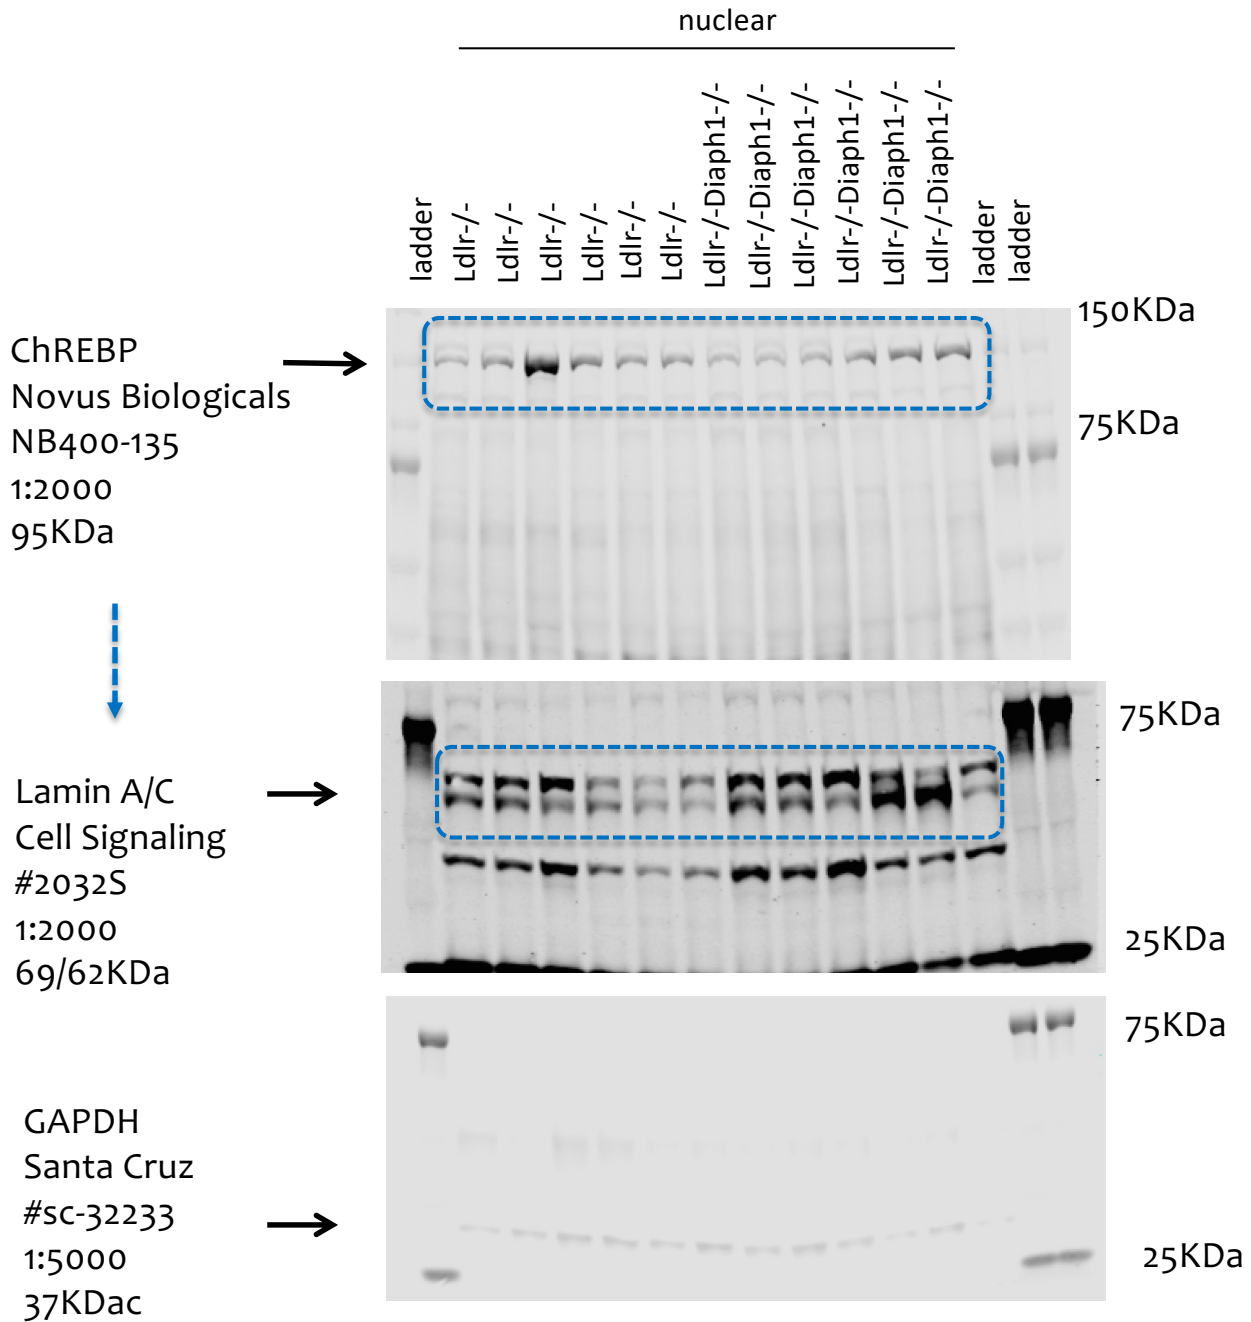

stripped

quantified in figure 5C

7.5% Acrylamide

Ldlr<sup>-/-</sup> nuclear n=6

Ldlr<sup>-/-</sup>Diaph1<sup>-/-</sup> nuclear n=6

# **Figure 6A-B-C-D-E-F**

# Exp. Code: 065-1-TOTAL LYSATE in livers

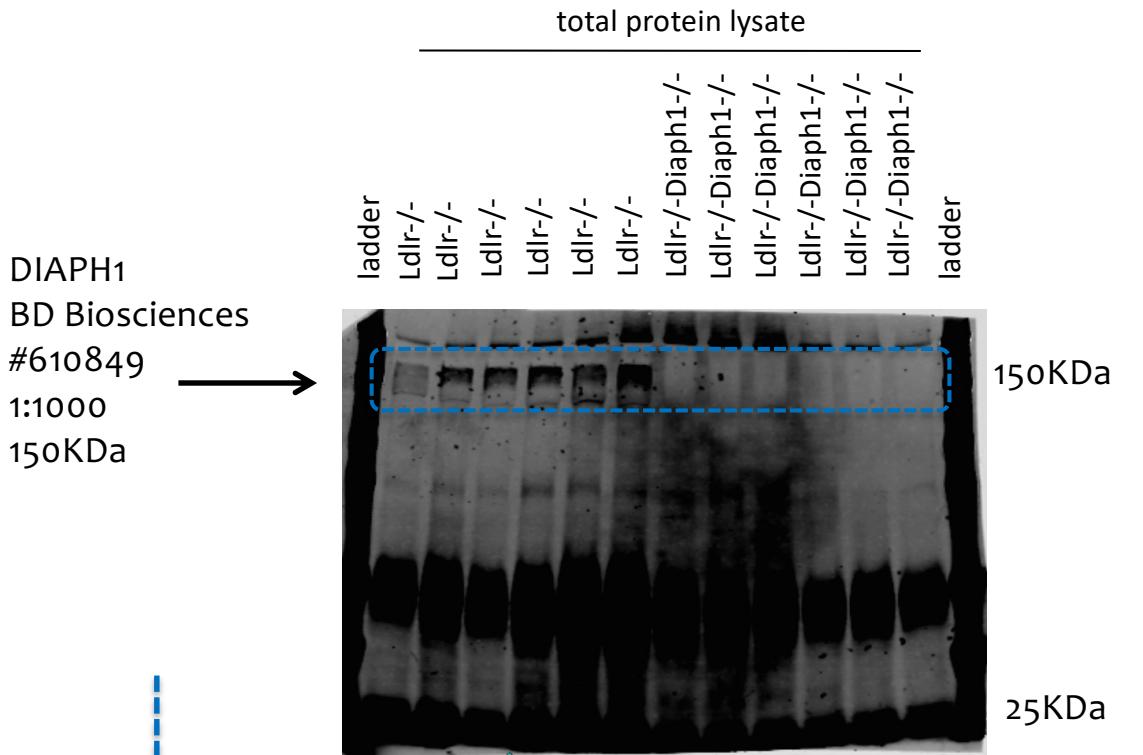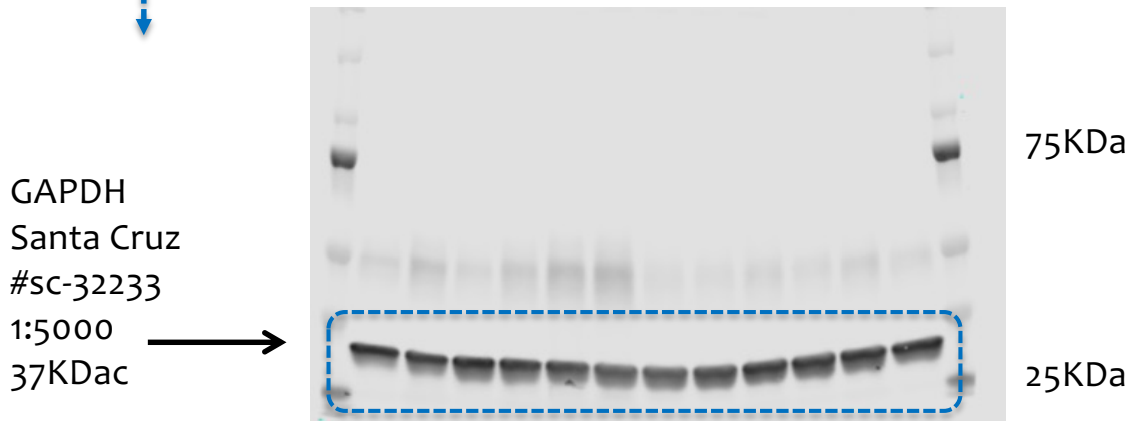

stripped

cropped for figure 6A  
quantified in figure 6B

7.5% Acrylamide  
Ldlr<sup>-/-</sup> n=6  
Ldlr<sup>-/-</sup>-Diaph1<sup>-/-</sup> n=6

# Exp. Code: 065-14-TOTAL LYSATE in livers

total protein lysate

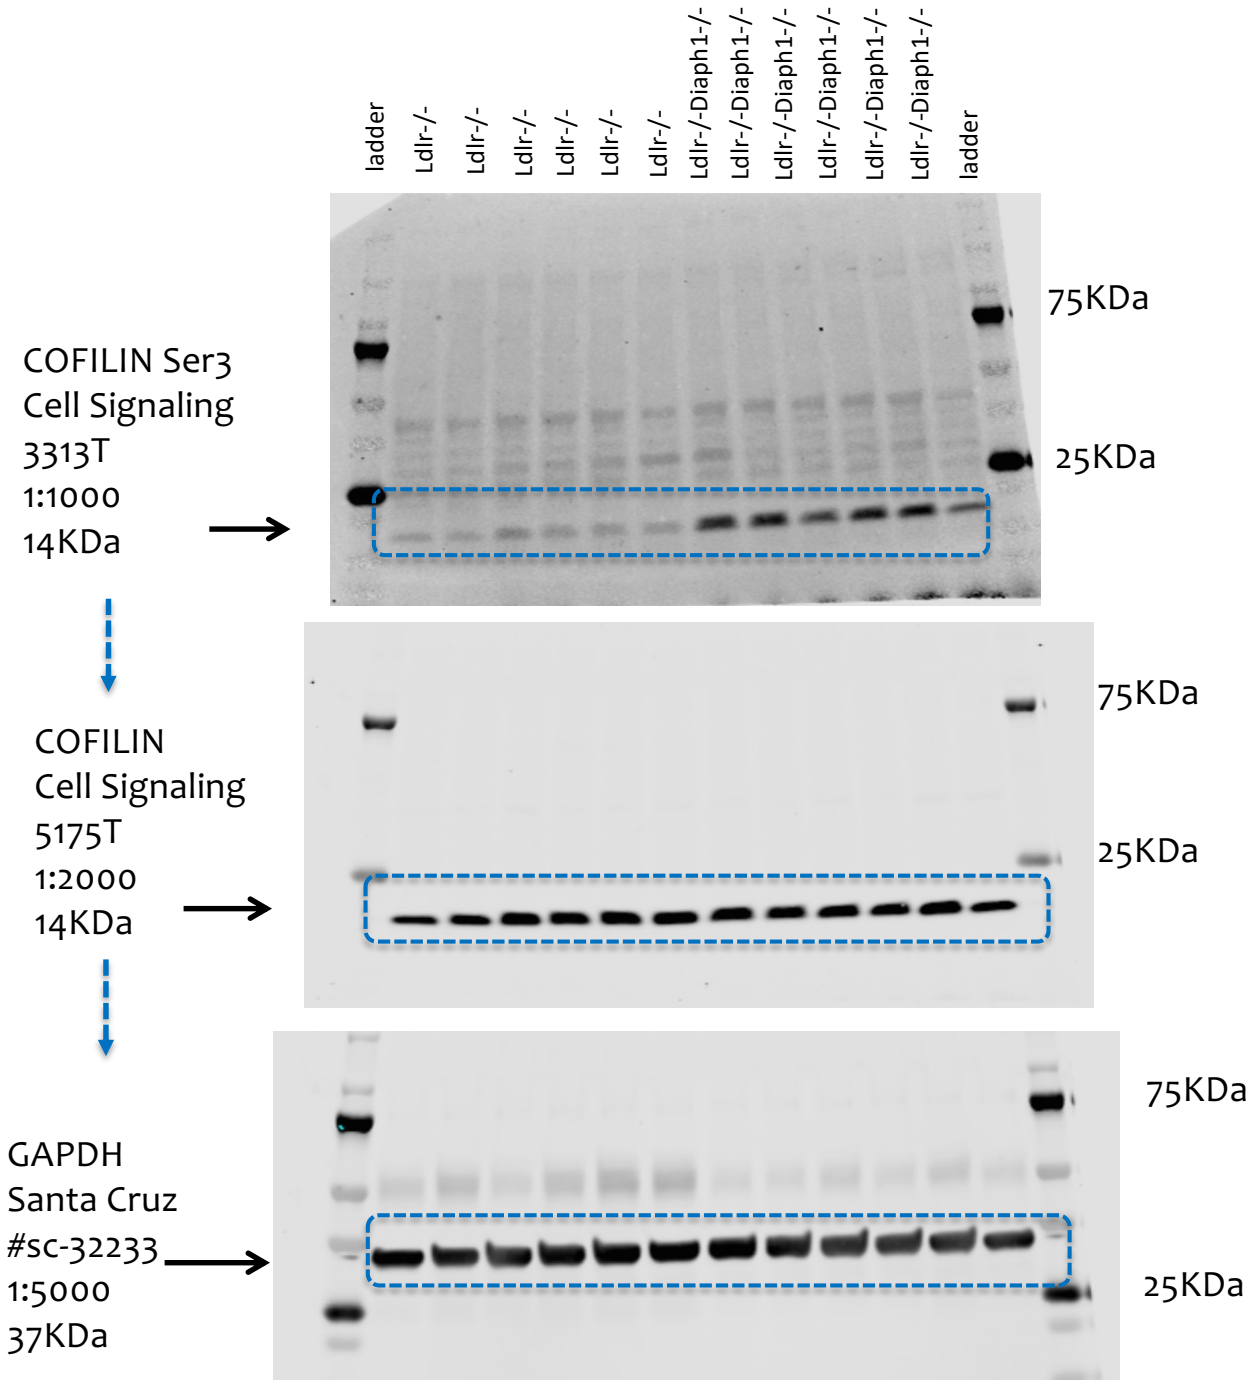

stripped

cropped for figure 6A  
quantified in figure 6C

4-20% Acrylamide  
*Ldlr*<sup>-/-</sup> n=6  
*Ldlr*<sup>-/-</sup>*Diaph1*<sup>-/-</sup> n=6



# Exp. Code: 065-10-TOTAL LYSATE in livers

total protein lysate

ladder Ldlr-/- Ldlr-/- Ldlr-/- Ldlr-/- Ldlr-/- Ldlr-/- Ldlr-/- Ldlr-/-Diaph1-/- Ldlr-/-Diaph1-/- Ldlr-/-Diaph1-/- Ldlr-/-Diaph1-/- Ldlr-/-Diaph1-/- Ldlr-/-Diaph1-/- ladder ladder

ROCK1  
Cell Signaling  
4035T  
1:2000  
160KDa

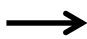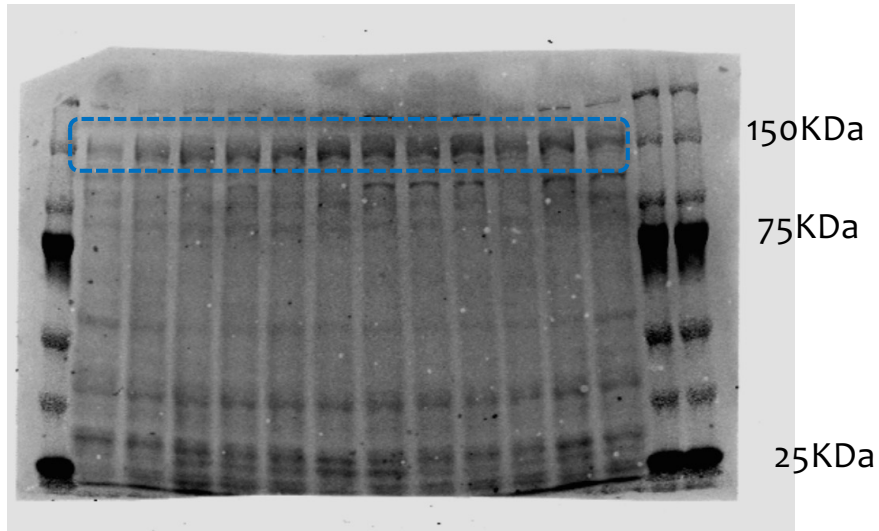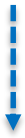

GAPDH  
Santa Cruz  
#sc-32233  
1:5000  
37KDa

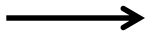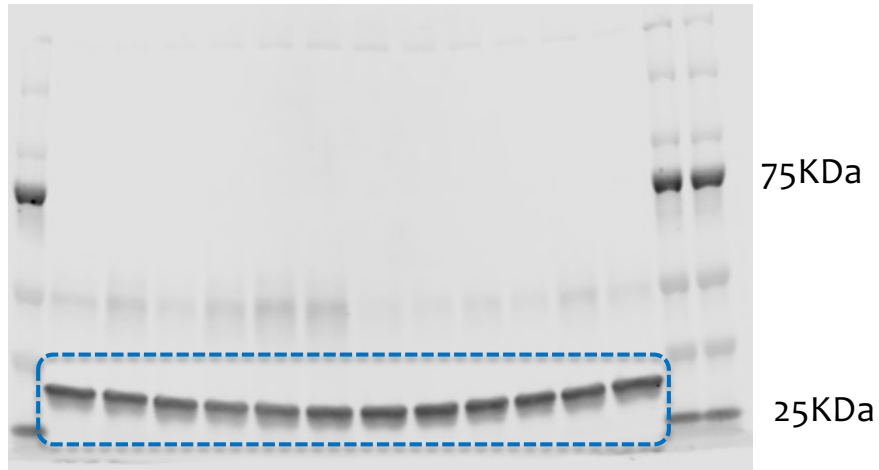

stripped

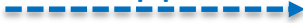

cropped for figure 6A  
quantified in figure 6D

7.5% Acrylamide  
Ldlr-/- n=6  
Ldlr-/-Diaph1-/- n=6

# Exp. Code: 065-18-TOTAL LYSATE in livers

total protein lysate

LIMK1 Thr508  
Abcam  
Ab194798  
1:1000  
72KDa →

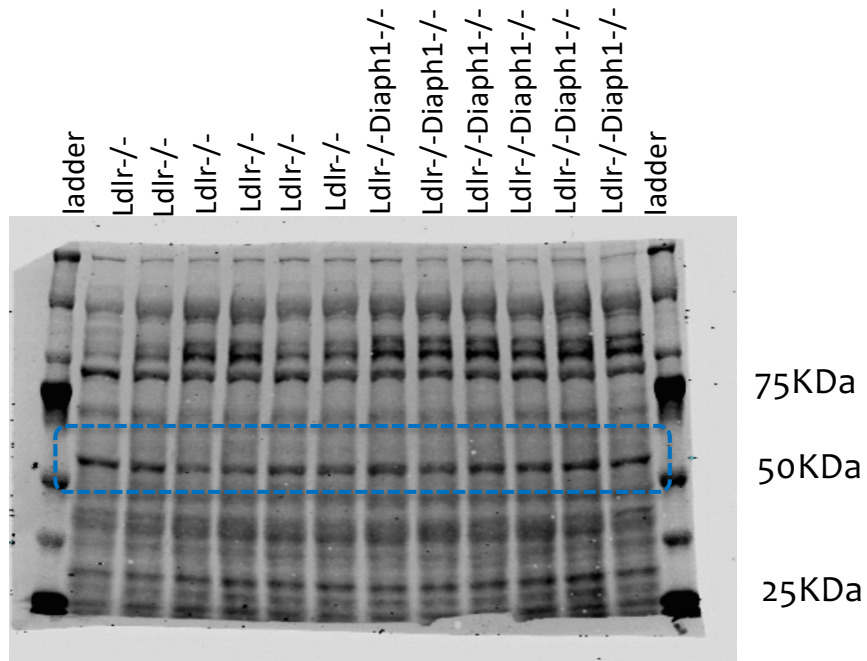

LIMK1  
Cell Signaling  
3842S →  
1:2000  
72KDa

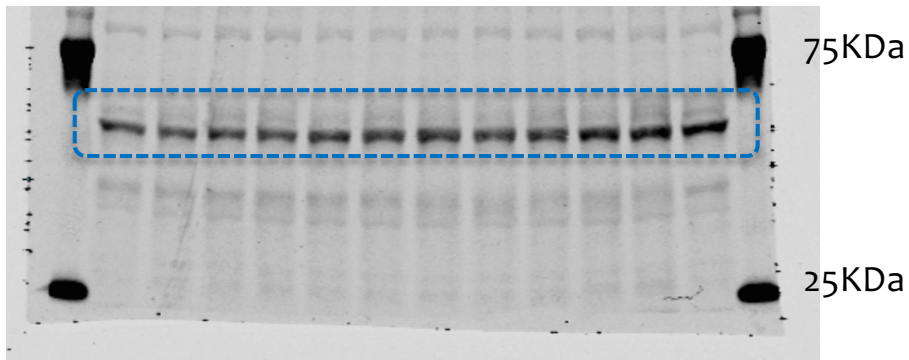

GAPDH  
Santa Cruz  
#sc-32233  
1:5000 →  
37KDa

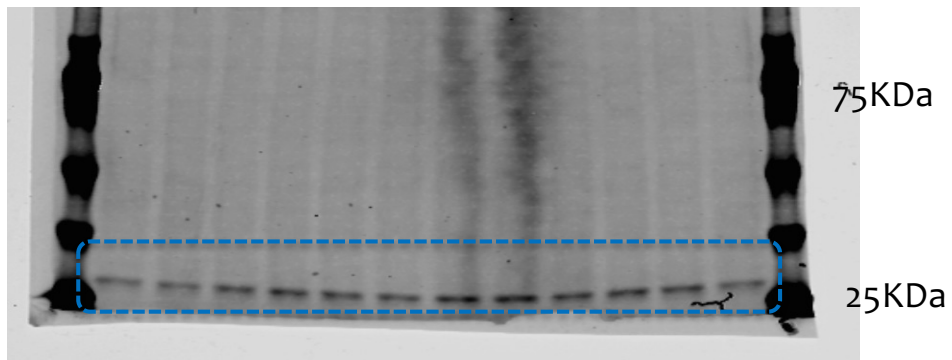

stripped →

cropped for figure 6A  
quantified in figure 6E

7.5% Acrylamide  
Ldlr-/- n=6  
Ldlr-/-Diaph1-/- n=6

# Exp. Code: 065-6 (079)-TOTAL LYSATE in livers

total protein lysate

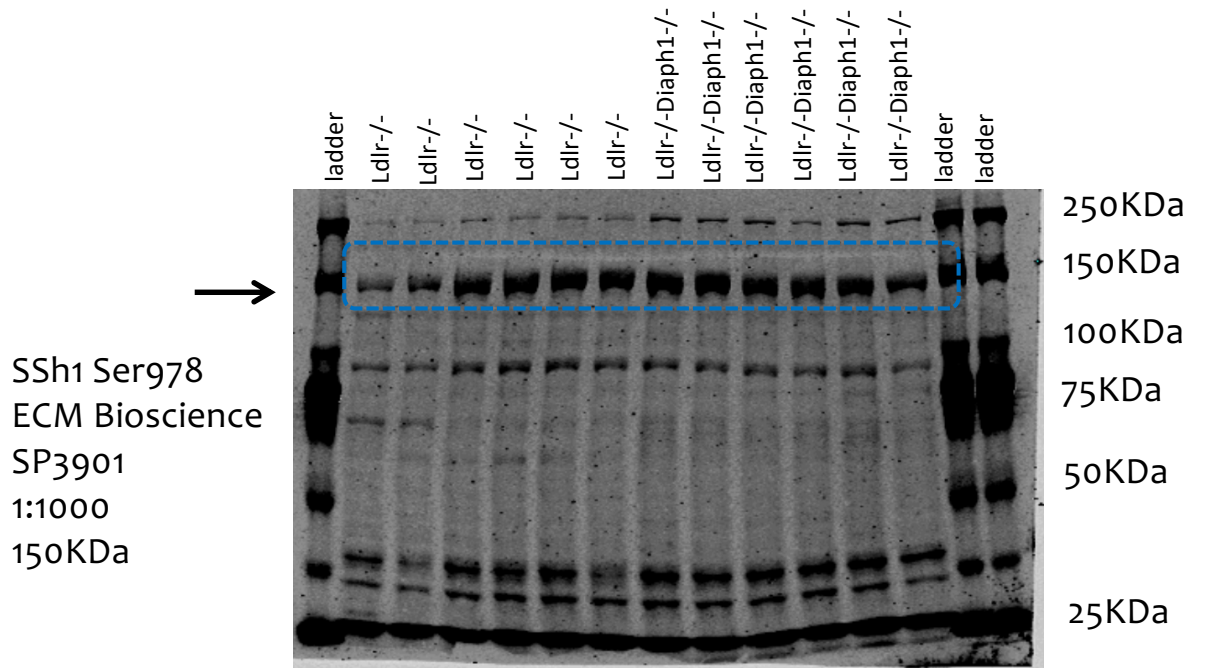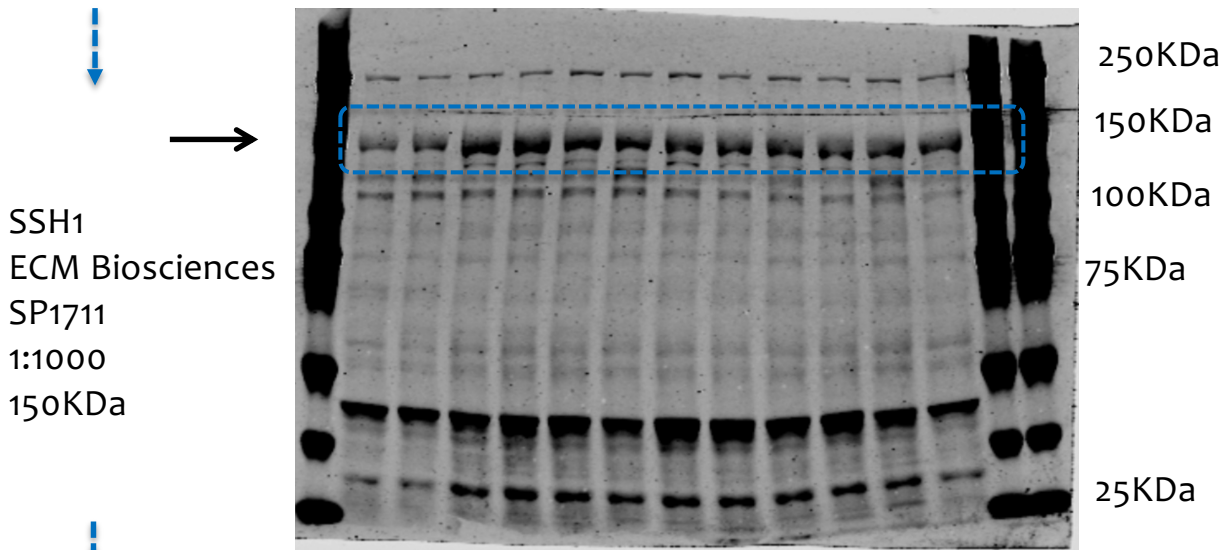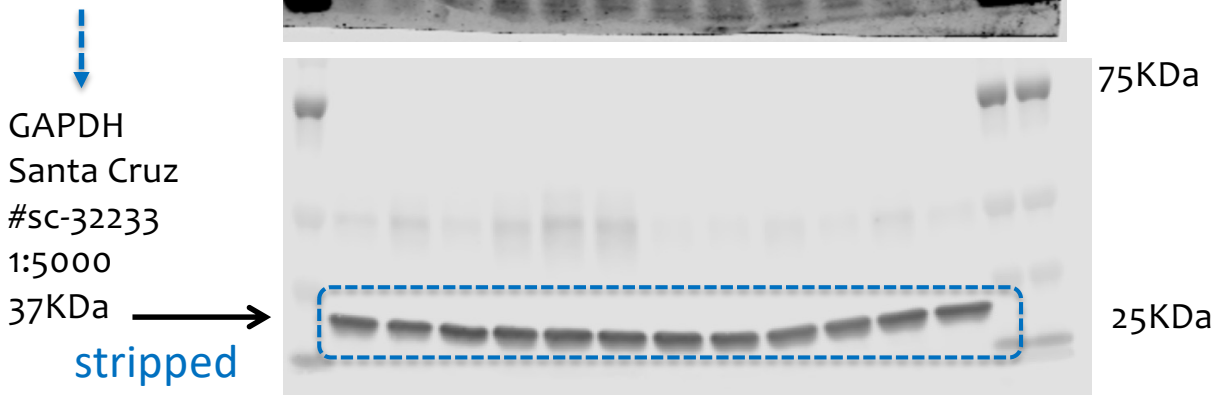

stripped

cropped for figure 6A  
quantified in figure 6F

7.5% Acrylamide  
Ldlr<sup>-/-</sup> n=6  
Ldlr<sup>-/-</sup>-Diaph1<sup>-/-</sup> n=6

# Figure 7A-B-C-D-E-F

# Exp. Code: 068-1 *Diaph1* KD in Hepa 1-6 cells

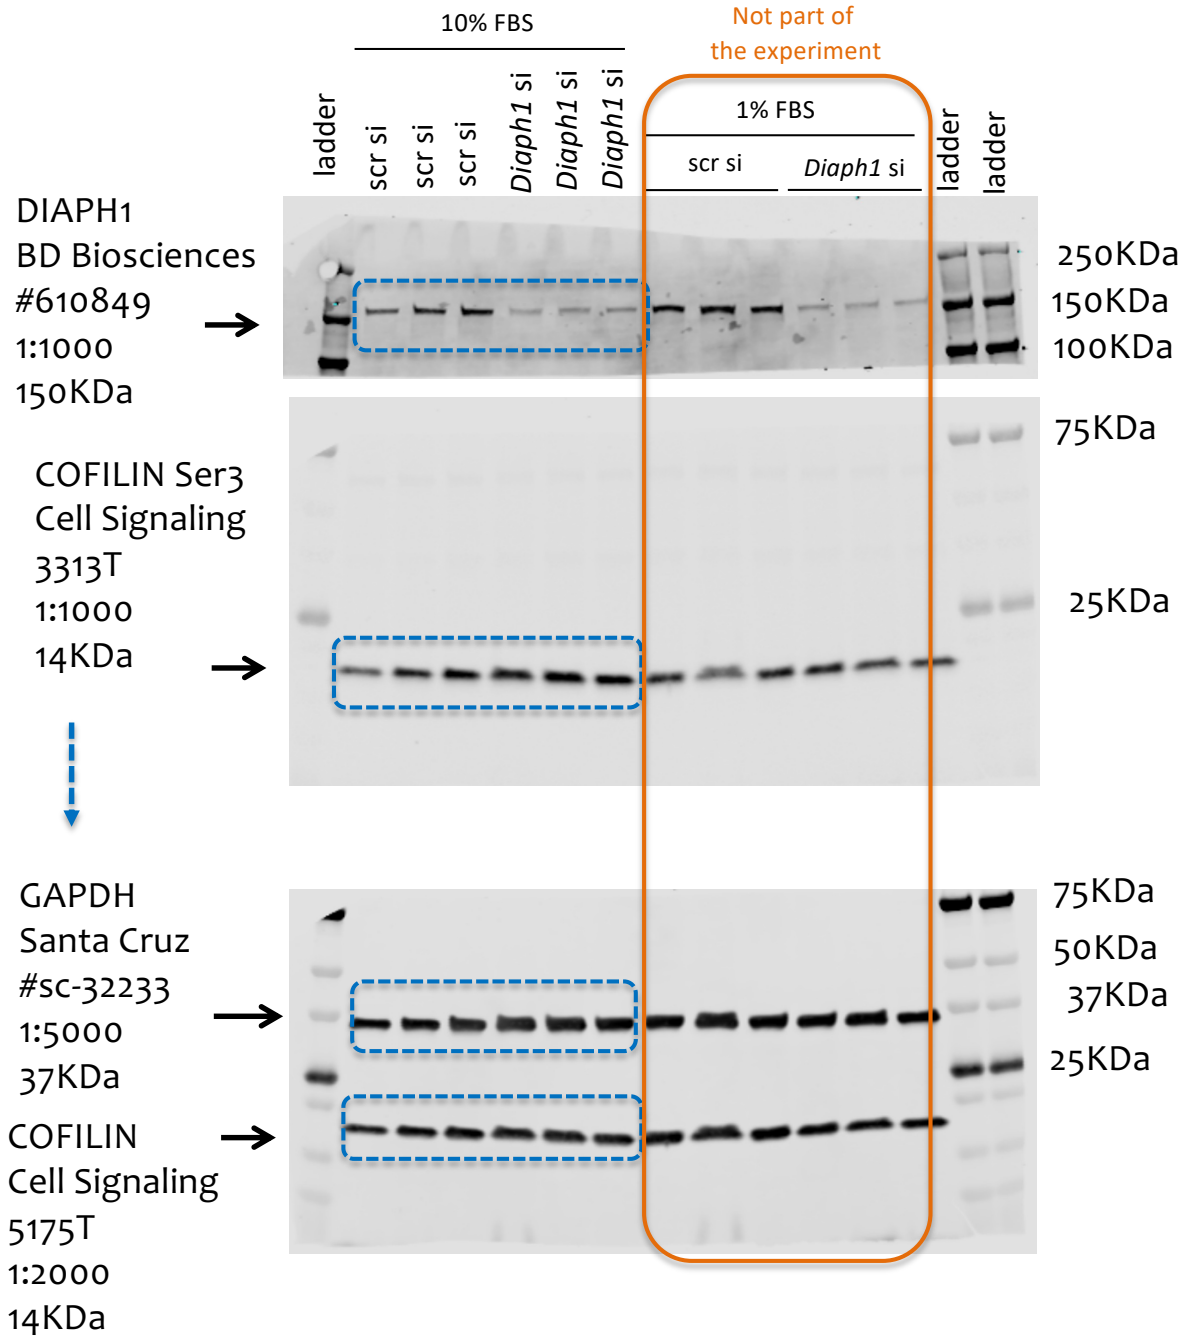

stripped

cropped for figure 7A  
quantified in figure 7B, 7C

4-20% Acrylamide  
Scr si n=3  
*Diaph1* si n=3

# Exp. Code: 071-1 *Diaph1* KD in Hepa 1-6 cells

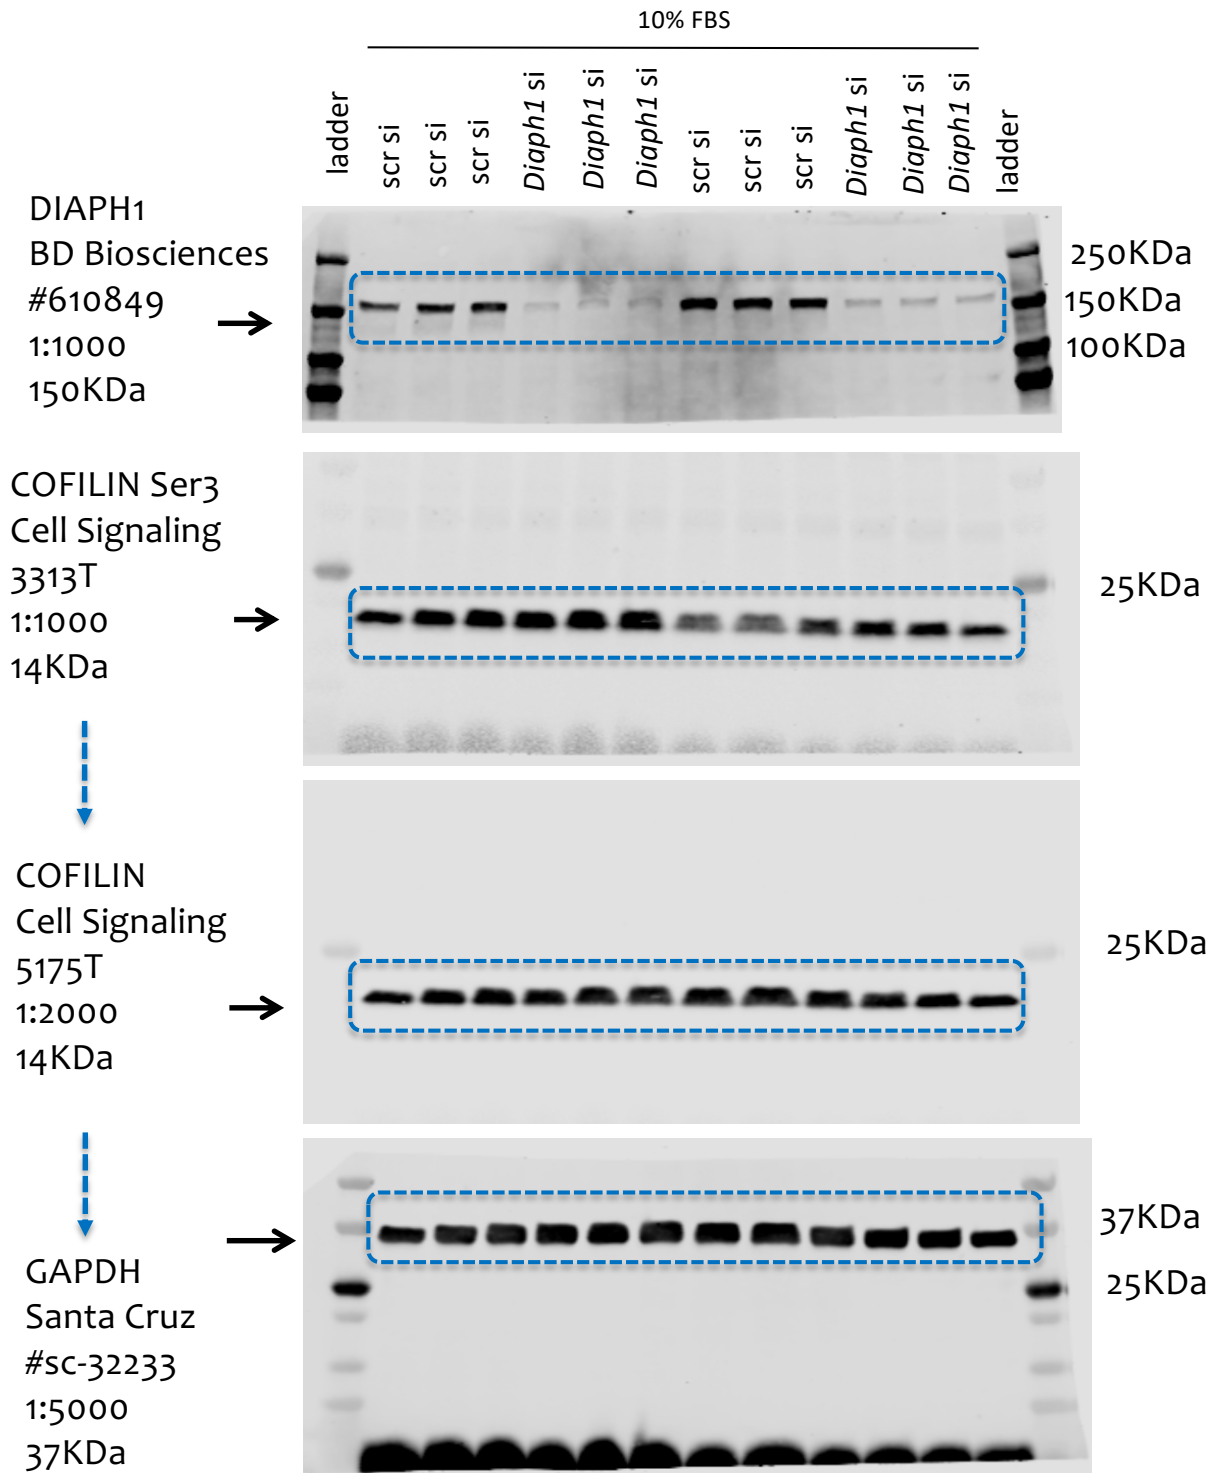

stripped

quantified in figure 7B, 7C

4-20% Acrylamide

Scr si n=6

*Diaph1* si n=6

# Exp. Code: 079 (071-1) Diaph1 KD in Hepa 1-6 cells

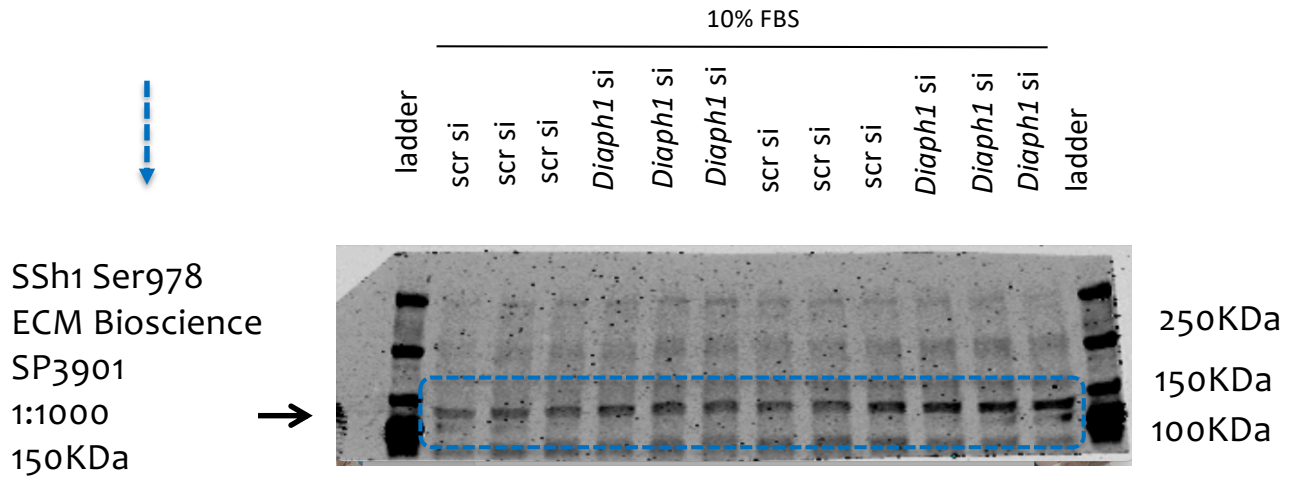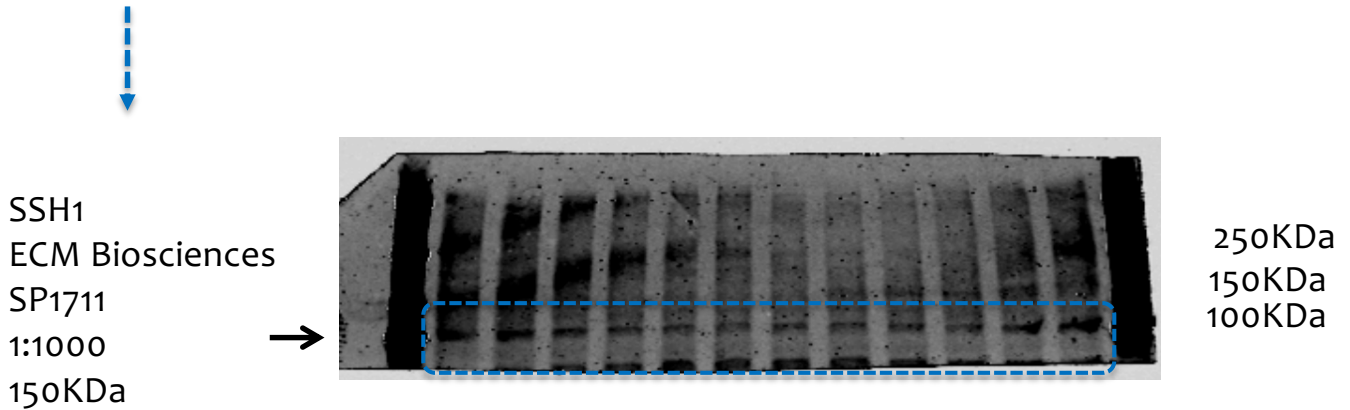

stripped

cropped for figure 7A  
quantified in figure 7D

4-20% Acrylamide  
Scr si n=6  
*Diaph1* si n=6



# Exp. Code: 068-2 Diaph1 KD in Hepa 1-6 cells

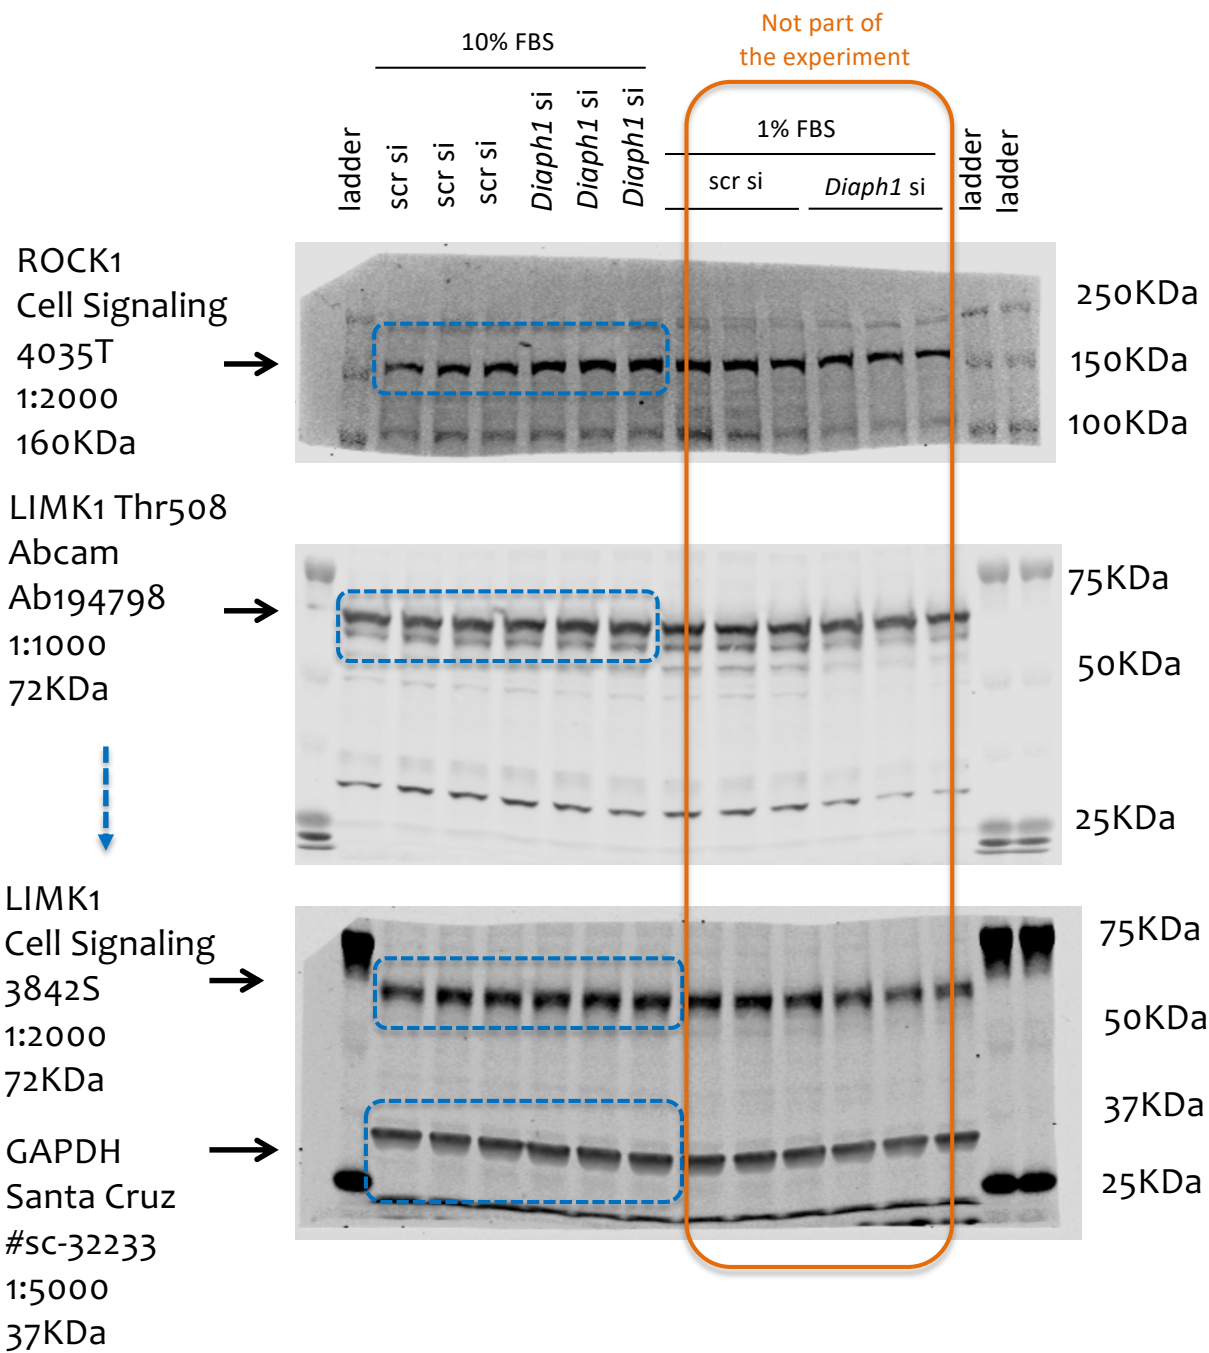

stripped  
 →  
 cropped for figure 7A  
 quantified in figure 7E, 7F

7.5% Acrylamide  
 Scr si n=3  
 Diaph1 si n=3



# Exp. Code: 067-2 Diaph1 KD in Hepa 1-6 cells

10% FBS

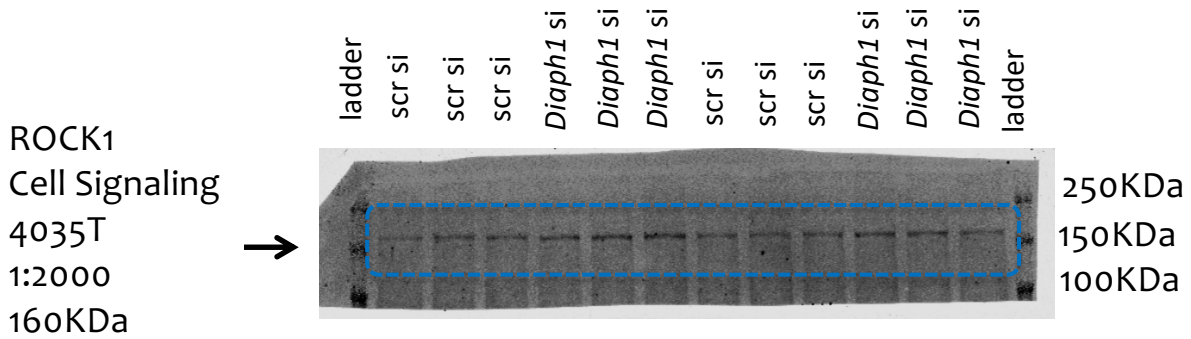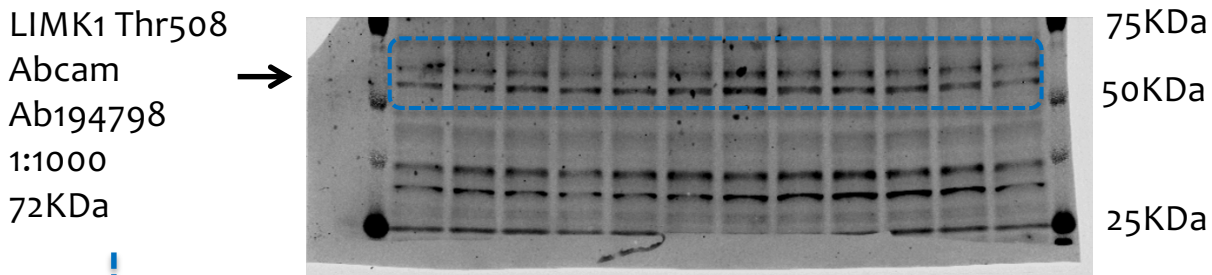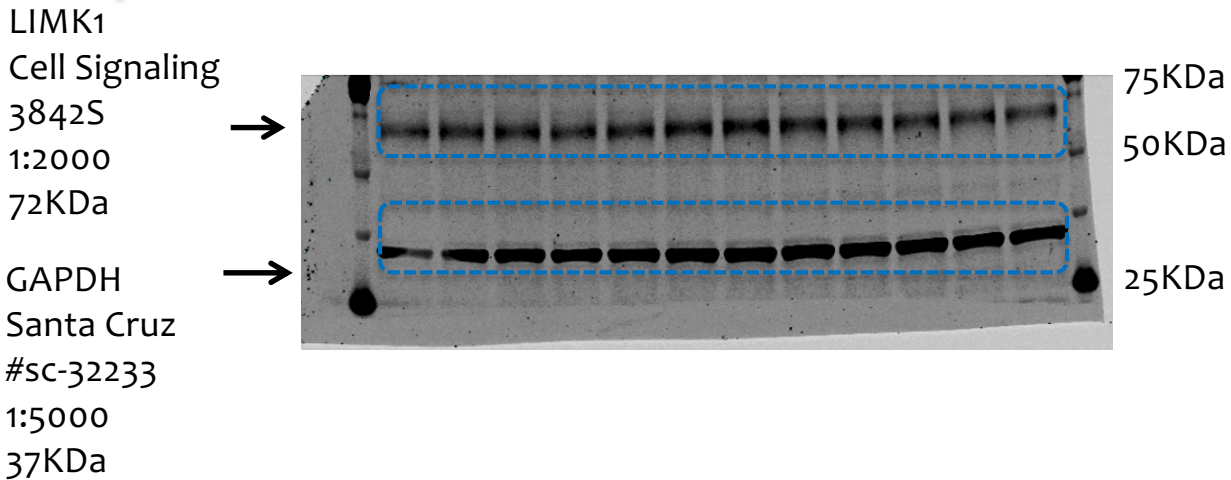

stripped

quantified in figure 7F

7.5% Acrylamide

Scr si n=6

*Diaph1* si n=6

# Figure 8A-D

# Exp. Code: 086-1-FRACTIONS in HEPA 1-6

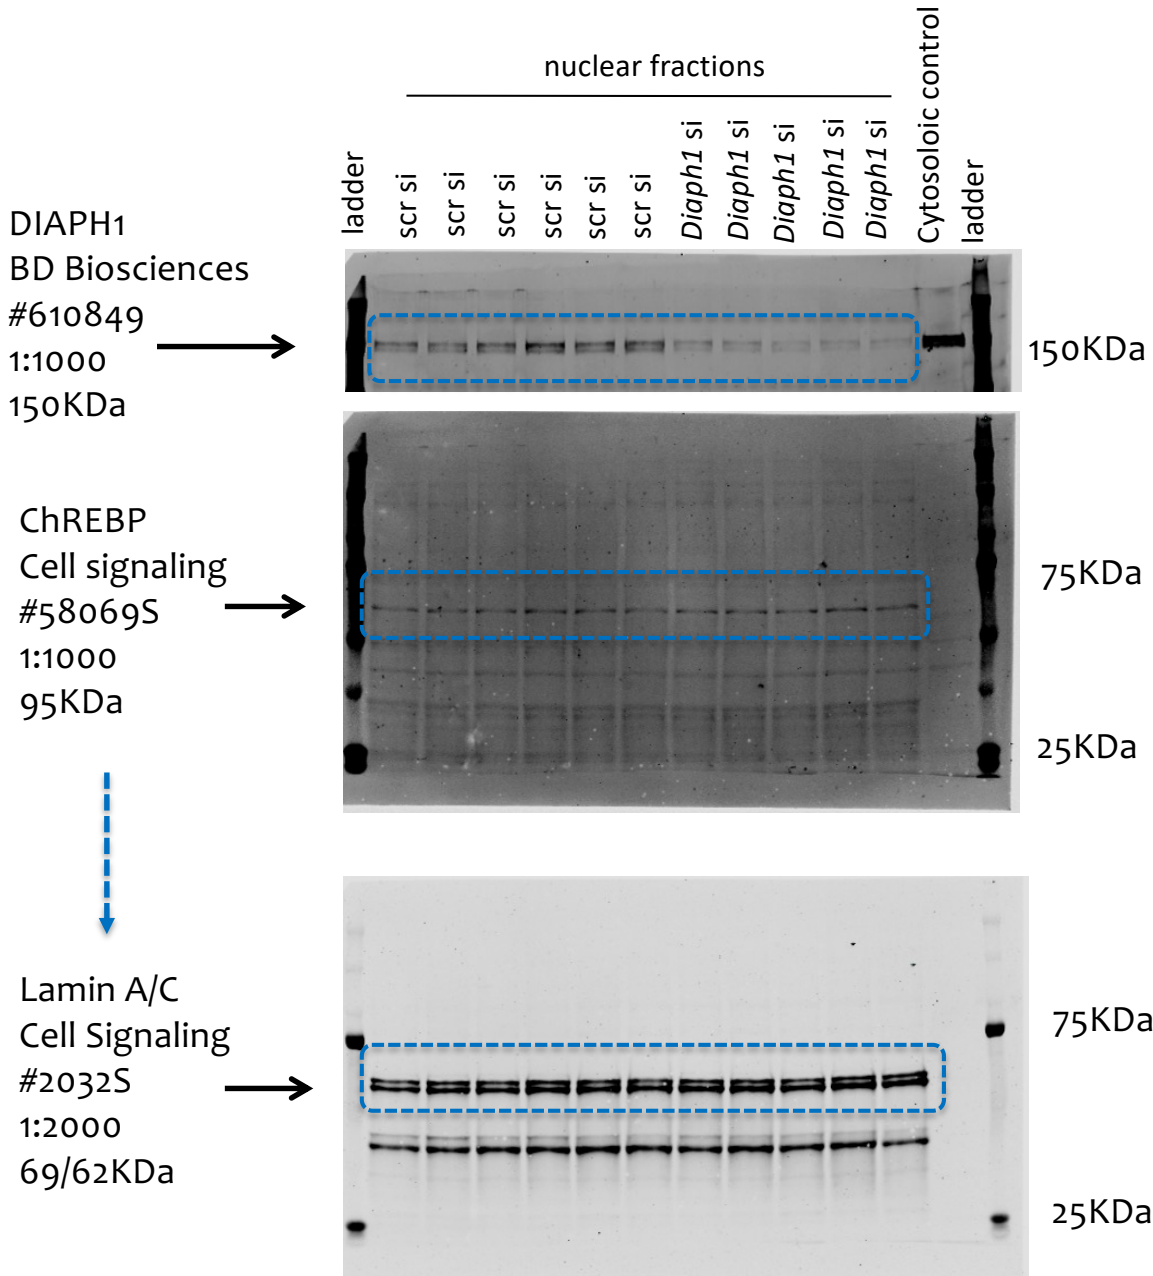

stripped

cropped for figure 8A  
quantified in figure 8B

7.5% Acrylamide  
Scr si nuclear n=6  
Diaph1 si nuclear n=5

# Exp. Code: 086-2-FRACTIONS in HEPA 1-6

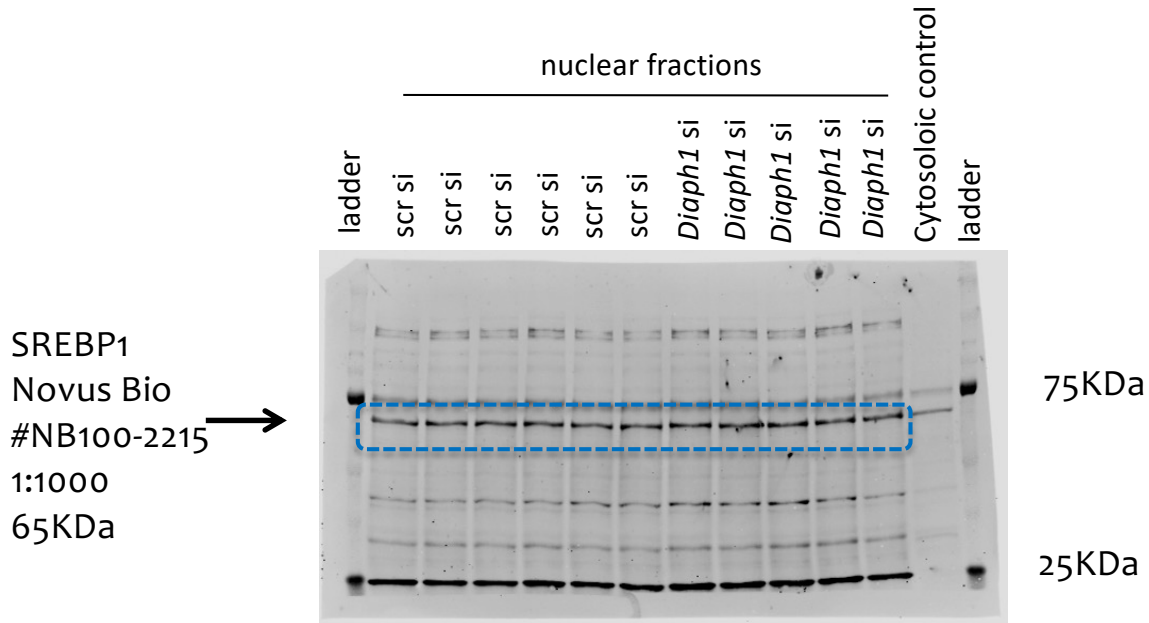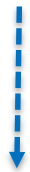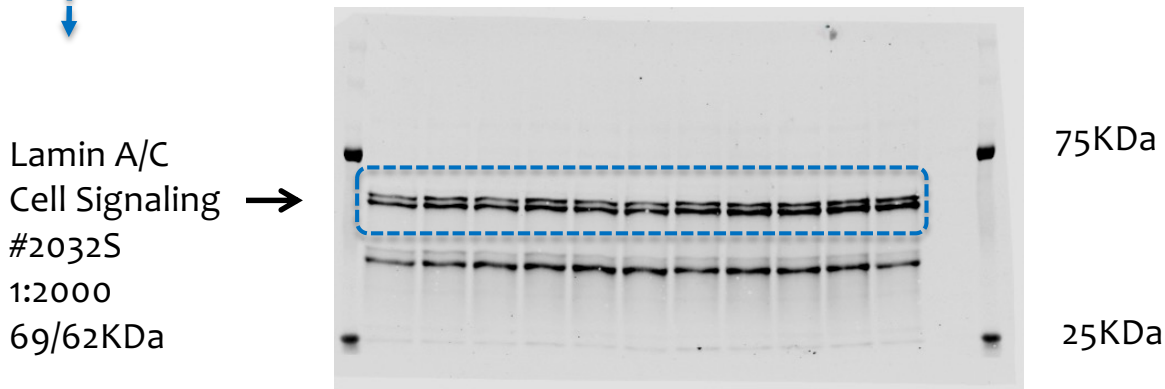

stripped

cropped for figure 8A  
quantified in figure 8B

7.5% Acrylamide  
Scr si nuclear n=6  
*Diaph1* si nuclear n=5

# **Supplemental Figure 7A-B-C**

# Exp. Code: 069-1-FRACTIONATION in livers

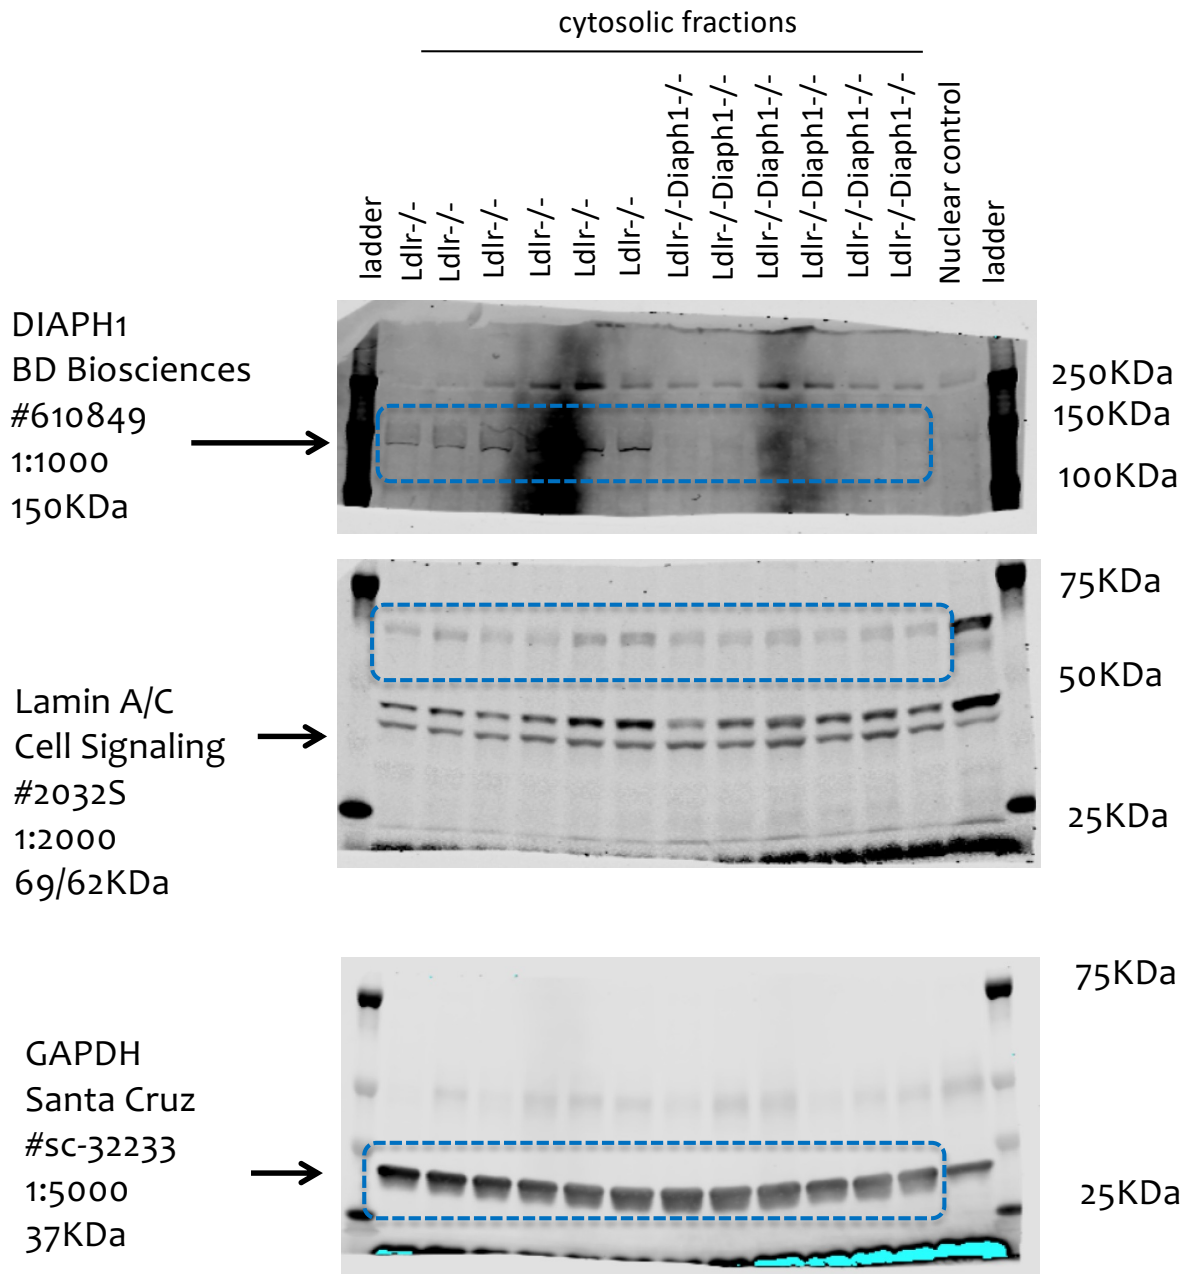

cropped for Supp figure 7A  
quantified in Supp figure 7B

7.5 % Acrylamide  
Ldlr<sup>-/-</sup> cytosolic n=6  
Ldlr<sup>-/-</sup>-Diaph1<sup>-/-</sup> cytosolic =6

# Exp. Code: 069-5-FRACTIONATION in livers

cytosolic fractions

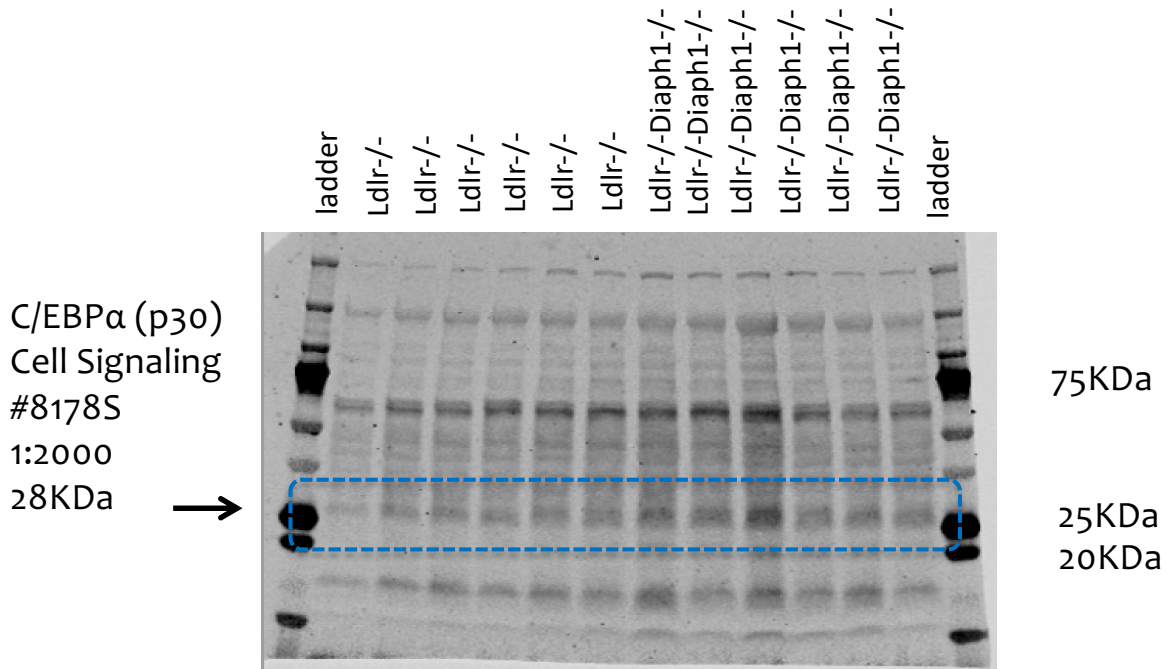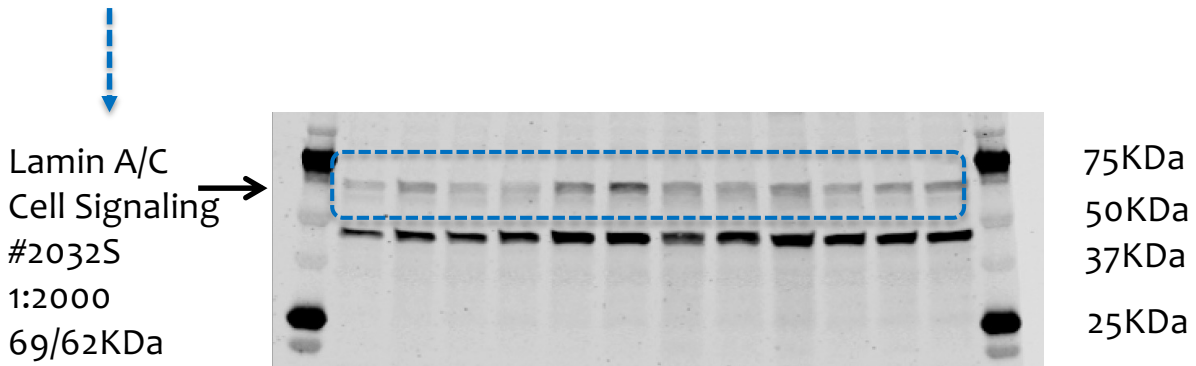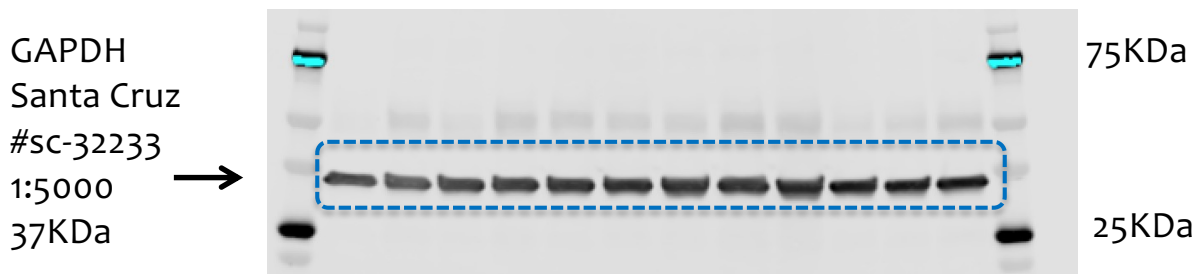

stripped

cropped for Supp figure 7A  
quantified in Supp figure 7B

4-20% Acrylamide  
Ldlr<sup>-/-</sup> cytosolic n=6  
Ldlr<sup>-/-</sup>-Diaph1<sup>-/-</sup> cytosolic =6

# Exp. Code: 069-3-FRACTIONATION in livers

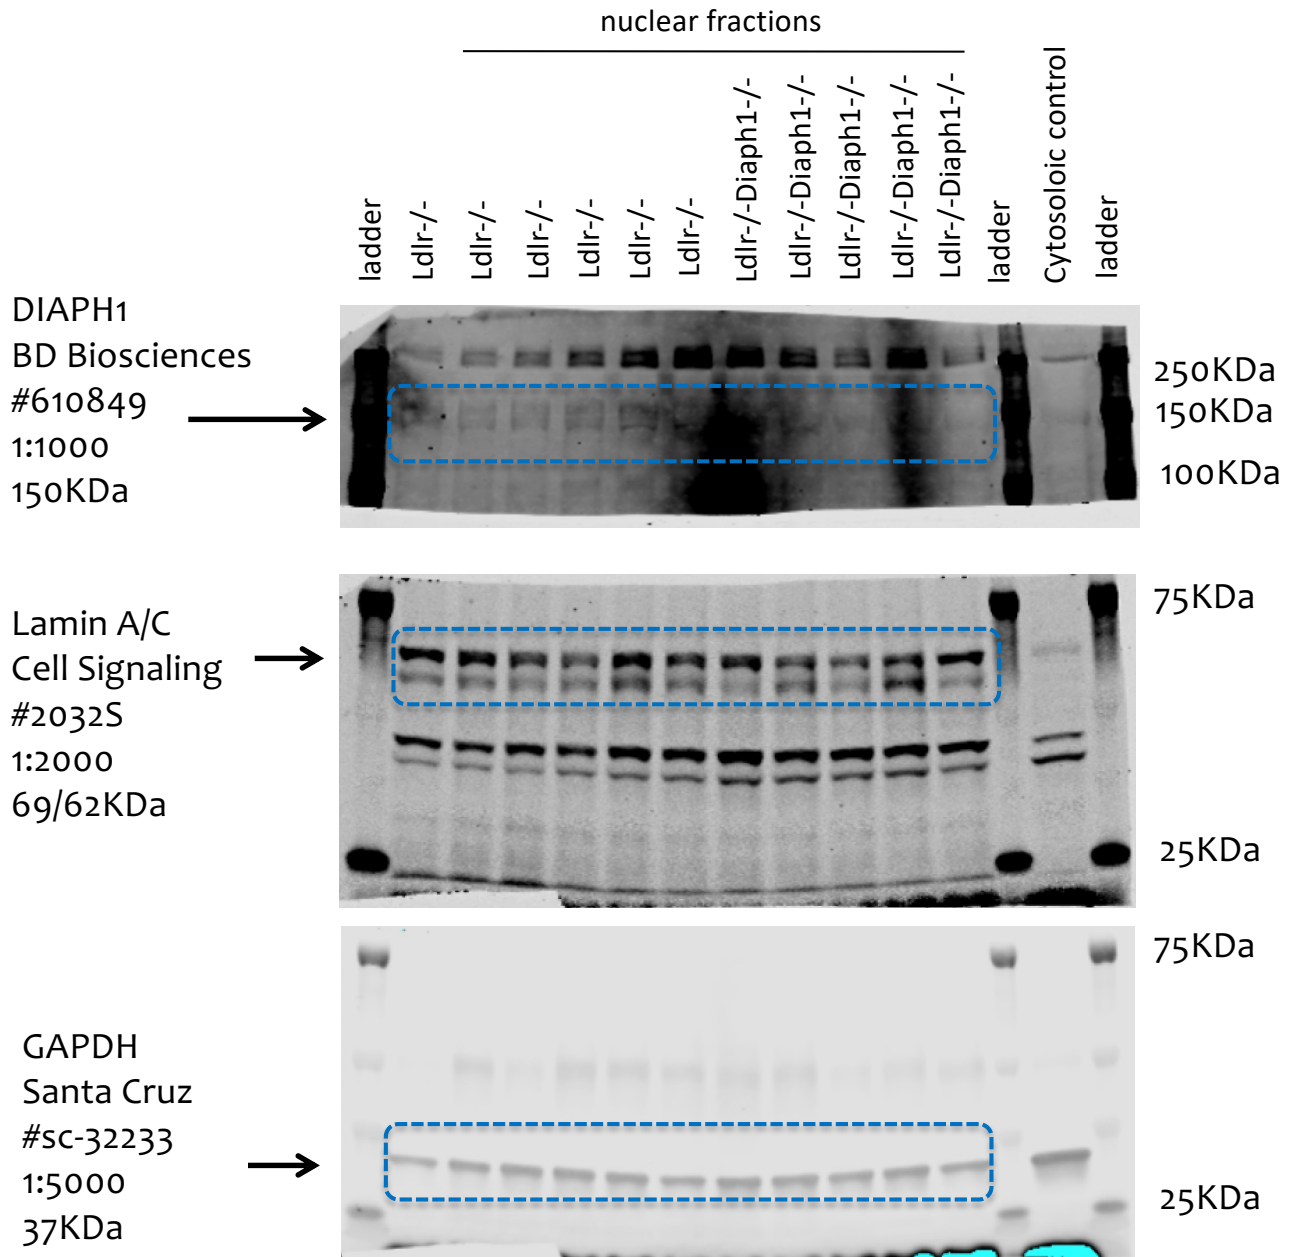

cropped for Supp figure 7A  
quantified in Supp figure 7C

7.5% Acrylamide  
Ldlr<sup>-/-</sup> nuclear n=6  
Ldlr<sup>-/-</sup>-Diaph1<sup>-/-</sup> nuclear n=5



# Exp. Code: 069-6-FRACTIONATION in livers

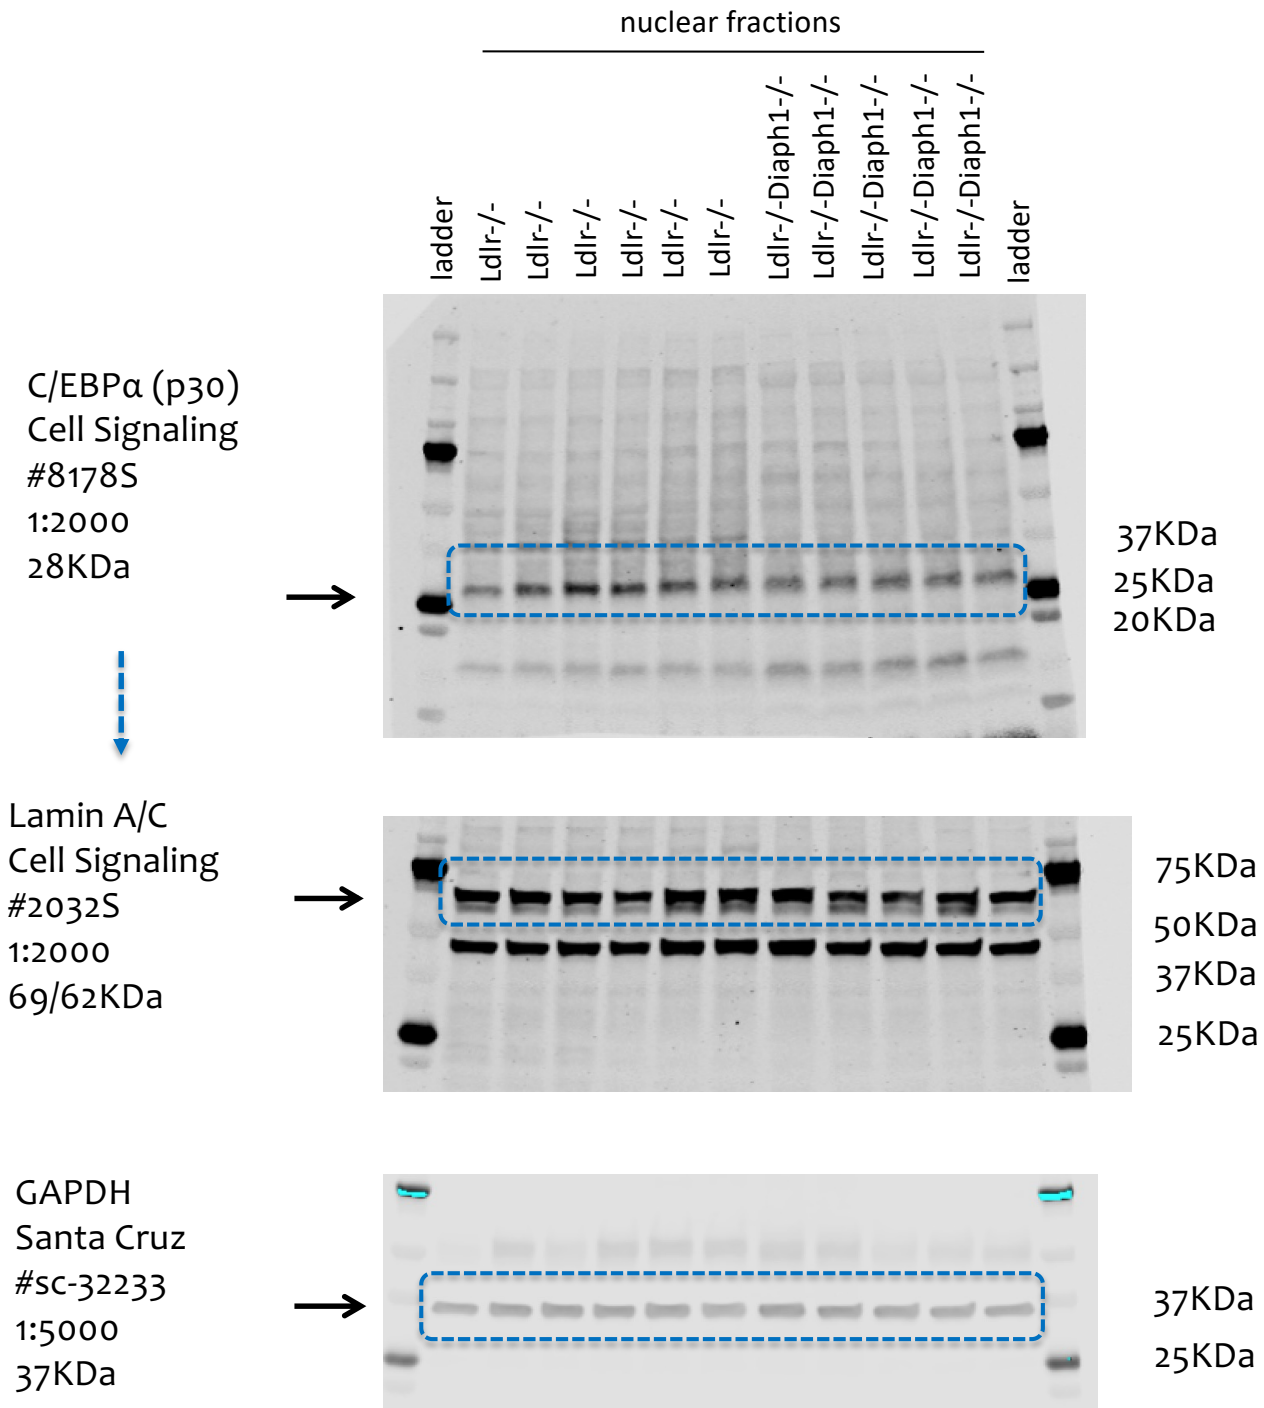

stripped

→

cropped for Supp figure 7A  
quantified in Supp figure 7C

4-20% Acrylamide  
Ldlr<sup>-/-</sup> nuclear n=6  
Ldlr<sup>-/-</sup>-Diaph1<sup>-/-</sup> nuclear n=5

# **Supplemental Figure 9A-B-C-D-E**

# Exp. Code: 065-9-TOTAL LYSATE in livers

total protein lysate

ladder Ldlr<sup>-/-</sup> Ldlr<sup>-/-</sup> Ldlr<sup>-/-</sup> Ldlr<sup>-/-</sup> Ldlr<sup>-/-</sup> Ldlr<sup>-/-</sup> Ldlr<sup>-/-</sup> Ldlr<sup>-/-</sup>Diaph1<sup>-/-</sup> Ldlr<sup>-/-</sup>Diaph1<sup>-/-</sup> Ldlr<sup>-/-</sup>Diaph1<sup>-/-</sup> Ldlr<sup>-/-</sup>Diaph1<sup>-/-</sup> Ldlr<sup>-/-</sup>Diaph1<sup>-/-</sup> Ldlr<sup>-/-</sup>Diaph1<sup>-/-</sup> ladder

AMPKα Thr172  
Cell Signaling  
2535T  
1:1000  
62KDa

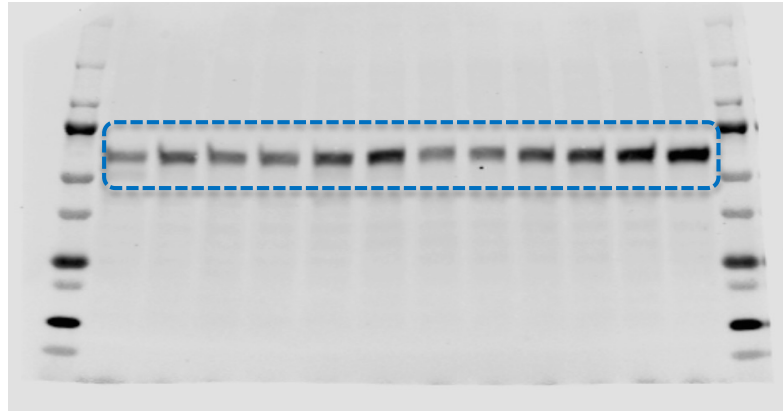

AMPKα  
Cell Signaling  
5831T  
1:2000  
62KDa

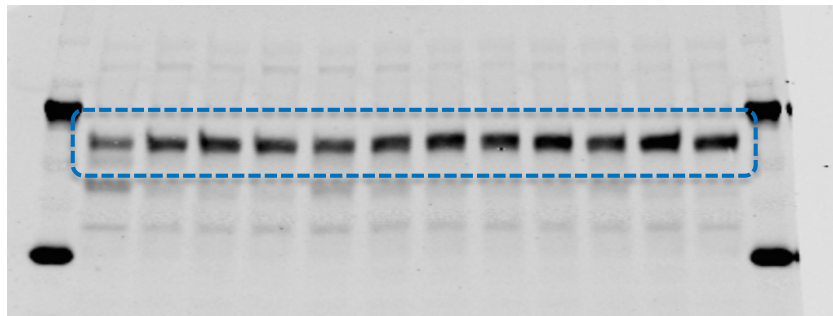

GAPDH  
Santa Cruz  
#sc-32233  
1:5000  
37KDa

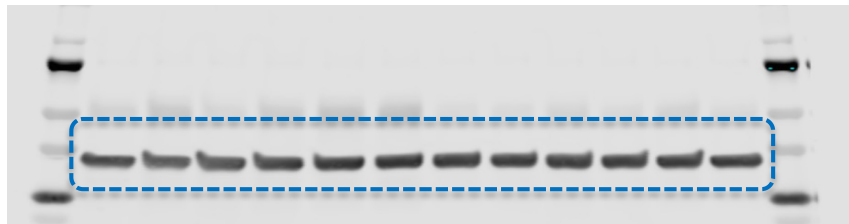

stripped

cropped for Supp figure 9A  
quantified in Supp figure 9B

4-20% Acrylamide  
Ldlr<sup>-/-</sup> n=6  
Ldlr<sup>-/-</sup>Diaph1<sup>-/-</sup> n=6

# Exp. Code: 065-5-TOTAL LYSATE in livers

total protein lysate

ladder Ldlr<sup>-/-</sup> Ldlr<sup>-/-</sup> Ldlr<sup>-/-</sup> Ldlr<sup>-/-</sup> Ldlr<sup>-/-</sup> Ldlr<sup>-/-</sup> Ldlr<sup>-/-</sup> Ldlr<sup>-/-</sup>-Diaph1<sup>-/-</sup> Ldlr<sup>-/-</sup>-Diaph1<sup>-/-</sup> Ldlr<sup>-/-</sup>-Diaph1<sup>-/-</sup> Ldlr<sup>-/-</sup>-Diaph1<sup>-/-</sup> Ldlr<sup>-/-</sup>-Diaph1<sup>-/-</sup> Ldlr<sup>-/-</sup>-Diaph1<sup>-/-</sup> ladder

AKT Ser473

Signaling

9271S

1:2000

60KDa

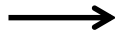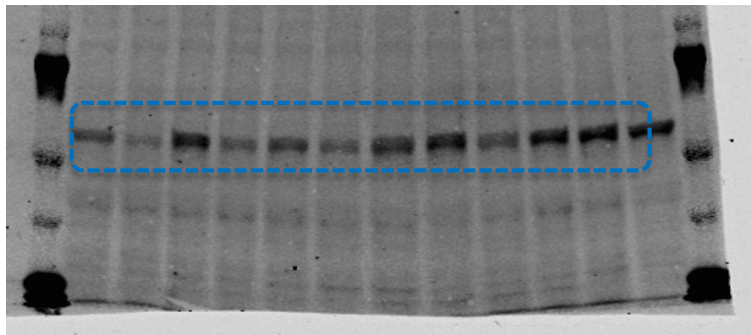

75KDa

25KDa

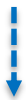

AKT

Cell Signaling

9272S

1:2000

60KDa

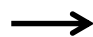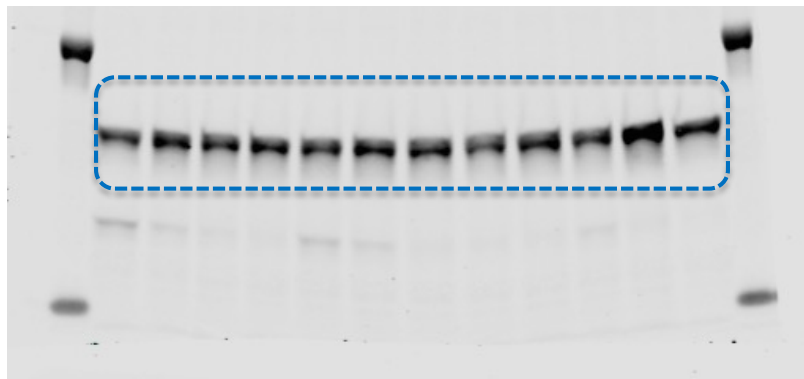

75KDa

25KDa

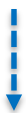

GAPDH

Santa Cruz

#sc-32233

1:5000

37KDa

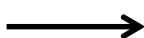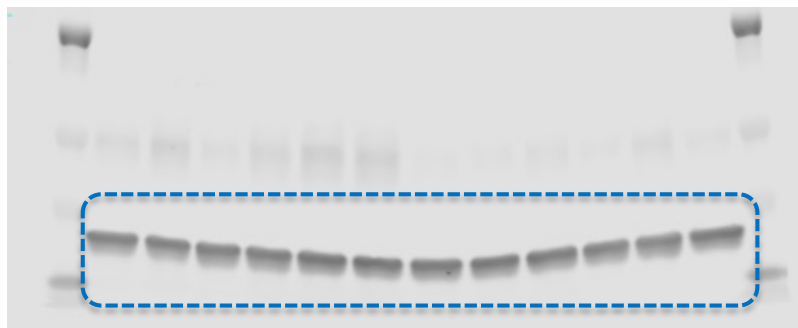

75KDa

25KDa

stripped

cropped for Supp figure 9A  
quantified in Supp figure 9C

7.5% Acrylamide

Ldlr<sup>-/-</sup> n=6

Ldlr<sup>-/-</sup>-Diaph1<sup>-/-</sup> n=6

# Exp. Code: 065-7-TOTAL LYSATE in livers

total protein lysate

mTOR Ser2448  
Cell Signaling  
5536T  
1:2000  
289KDa

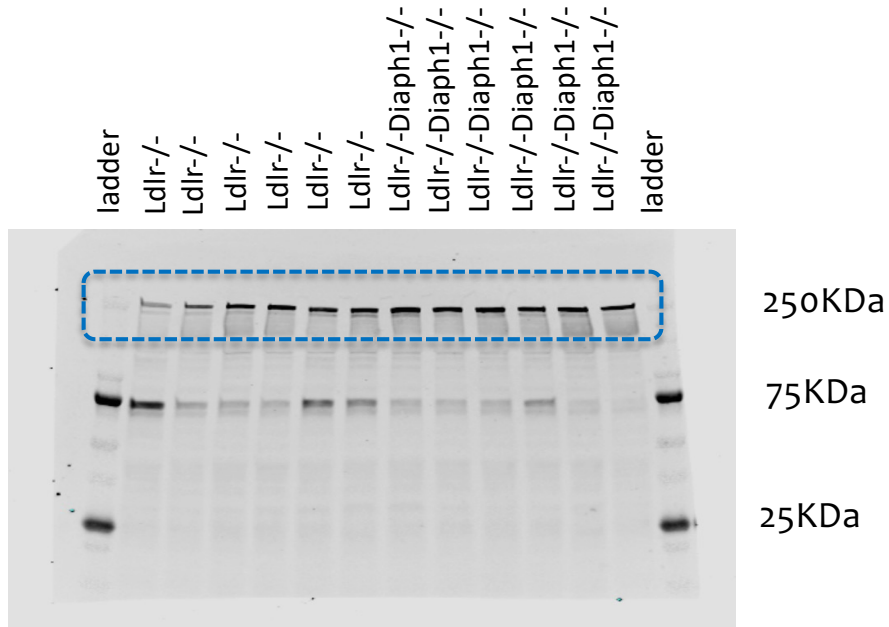

mTOR  
Cell Signaling  
2972S  
1:2000  
289KDa

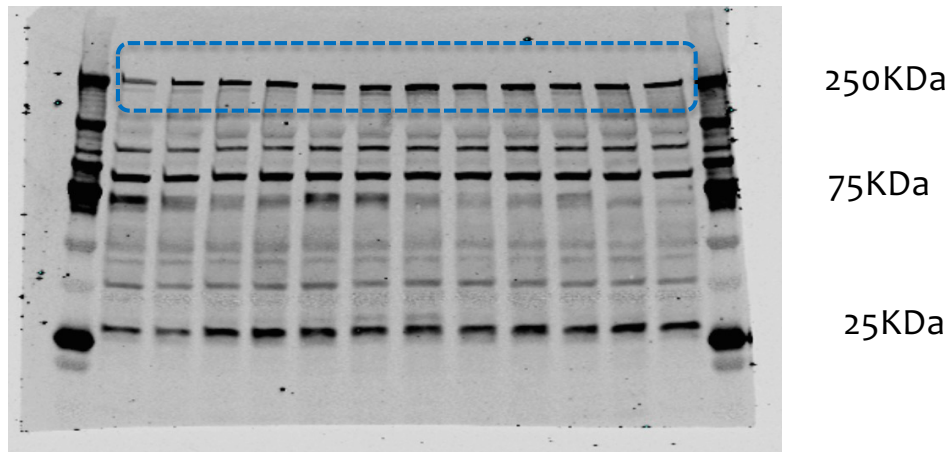

GAPDH  
Santa Cruz  
#sc-32233  
1:5000  
37KDa

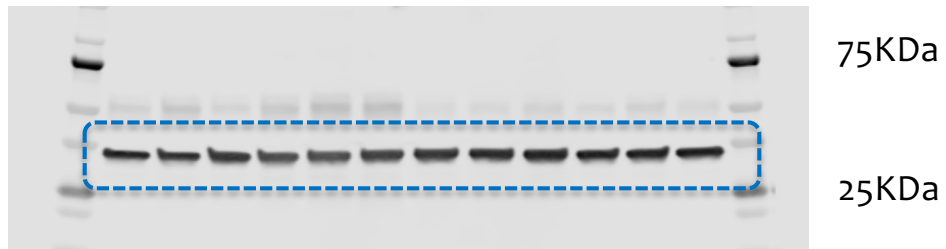

stripped

cropped for Supp figure 9A  
quantified in Supp figure 9D

4-20% Acrylamide  
Ldlr-/- n=6  
Ldlr-/-Diaph1-/- n=6

# Exp. Code: 065-8-TOTAL LYSATE in livers

total protein lysate

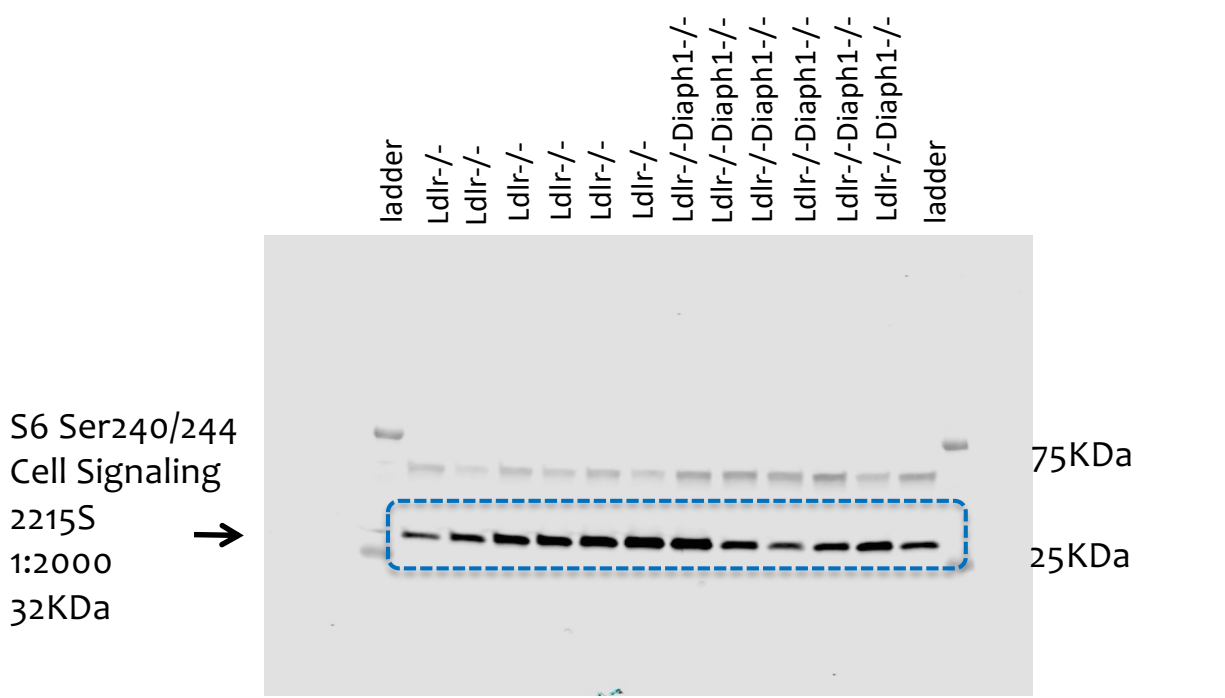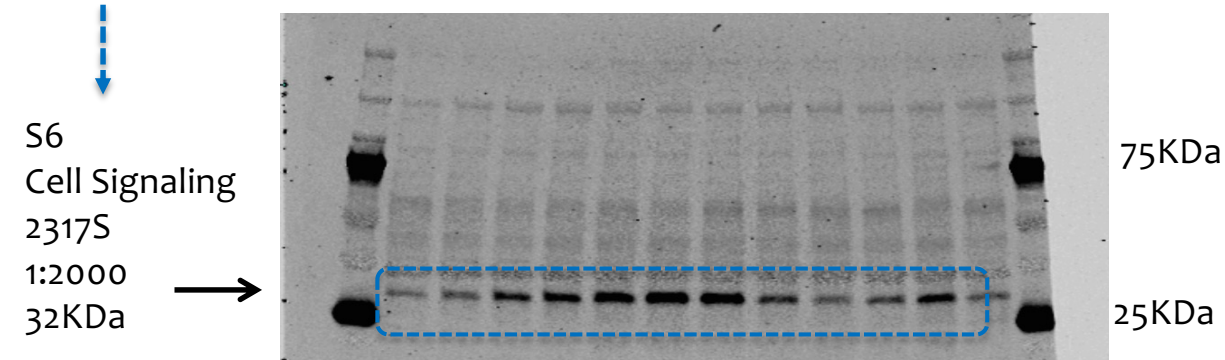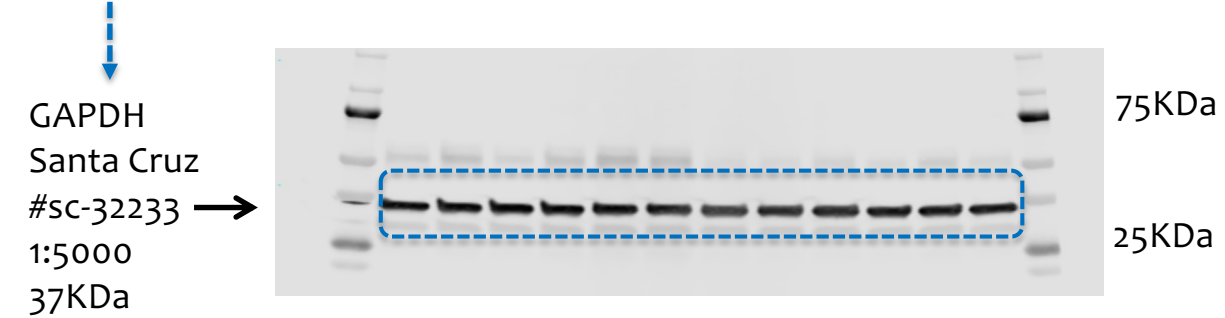

stripped  
cropped for Supp figure 9A  
quantified in Supp figure 9E

4-20% Acrylamide  
Ldlr<sup>-/-</sup> n=6  
Ldlr<sup>-/-</sup>-Diaph1<sup>-/-</sup> n=6

# **Supplemental Figure 10A-B-C**

# Exp. Code: 076-1-TOTAL LYSATE in Aortas

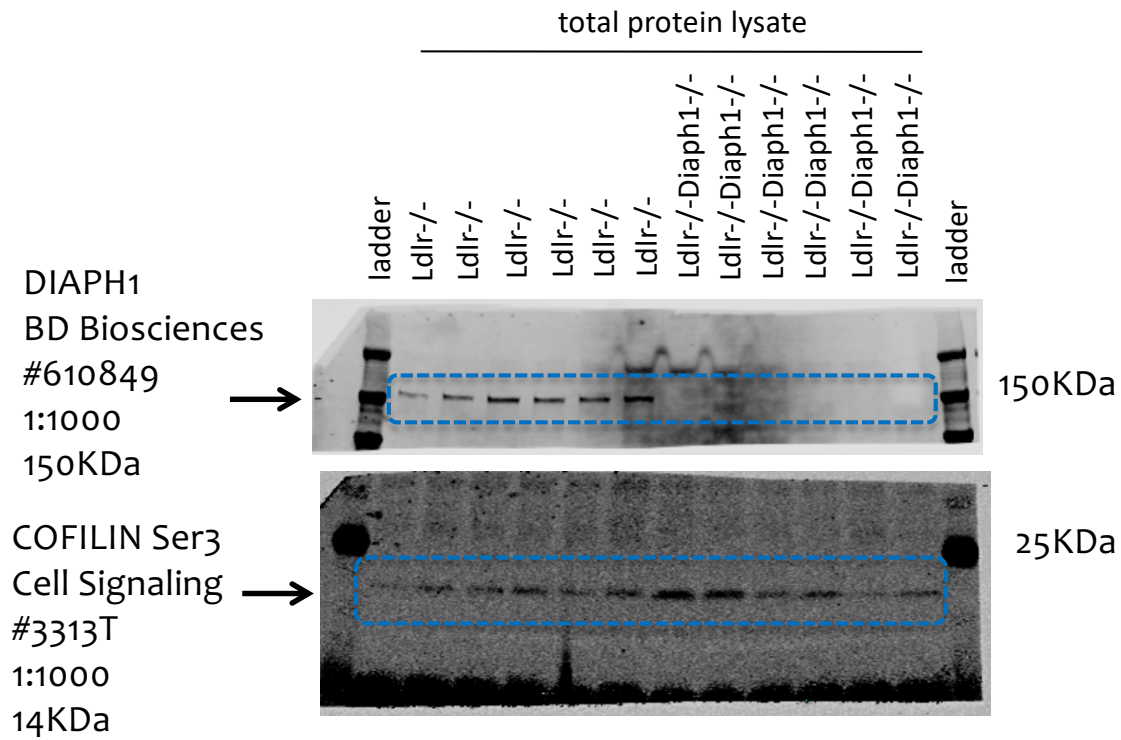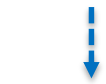

COFILIN  
Cell Signaling  
#5175T  
1:2000  
14KDa

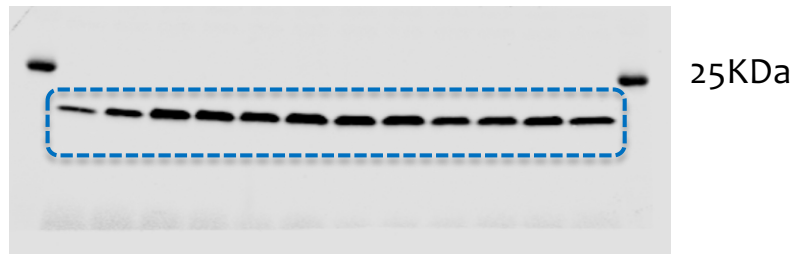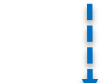

GAPDH  
Santa Cruz  
#sc-32233  
1:5000  
37KDa

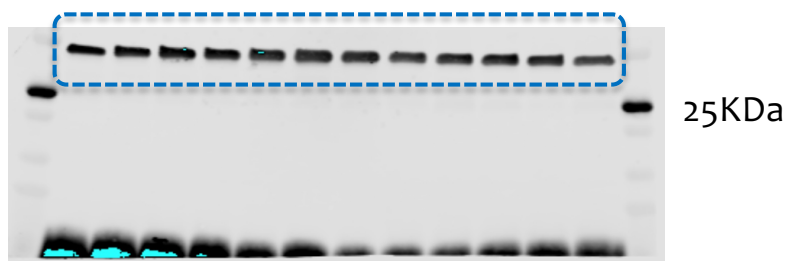

stripped

cropped for Supp figure 10A  
quantified in Supp figure 10B, C

4-20% Acrylamide  
Ldlr-/- n=6  
Ldlr-/-Diaph1-/- n=6
