# Supplementary material for: DIAPH1 mediates progression of atherosclerosis and regulates hepatic lipid metabolism in mice
Source: PubMed Central journal article supplement (PMC10023694; doi:10.1038/s42003-023-04643-2), 2023-03-17

Figure 5D

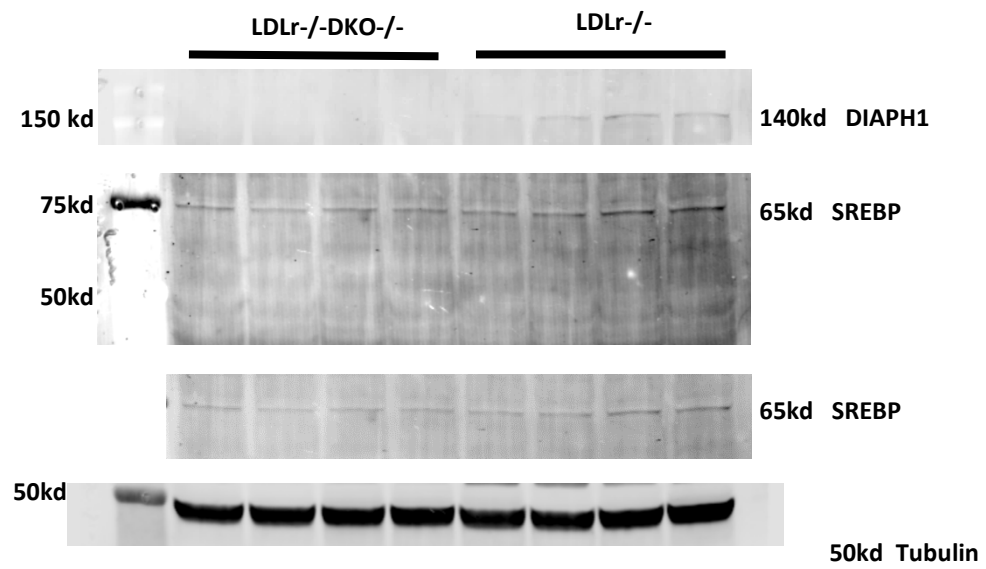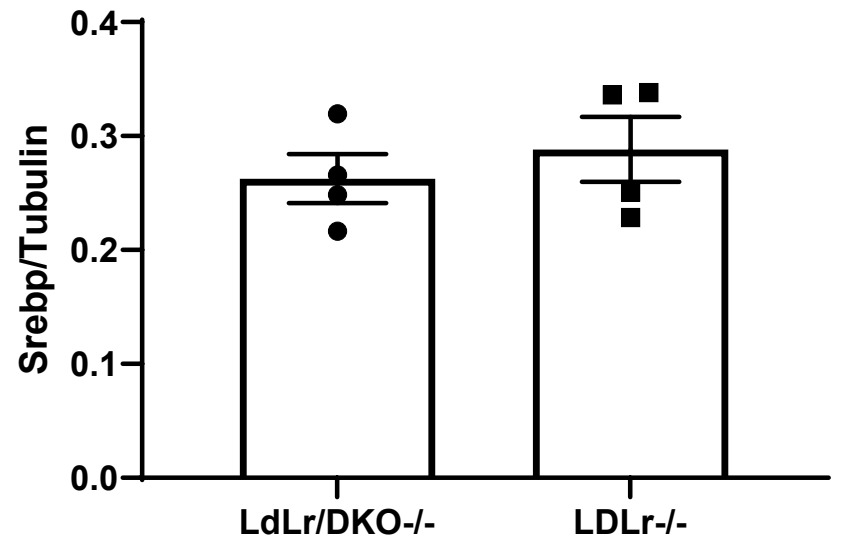

Column B vs. Column A  
 LDLr-/- vs. LdLr/DKO-/-

Unpaired t test  
 P value 0.4979  
 P value summary ns  
 Significantly different (P < 0.05)? No  
 One- or two-tailed P value? Two-tailed  
 t, df t=0.7212, df=6

How big is the difference?  
 Mean of column A 0.2626  
 Mean of column B 0.2883  
 Difference between means (B - A) ± SEM 0.02576 ± 0.03571  
 95% confidence interval -0.06163 to 0.1131  
 R squared (eta squared) 0.07977

F test to compare variances  
 F, DFn, Dfd 1.757, 3, 3  
 P value 0.6547  
 P value summary ns  
 Significantly different (P < 0.05)? No

Data analyzed  
 Sample size, column A 4  
 Sample size, column B 4

For publication use below, the image has been flipped

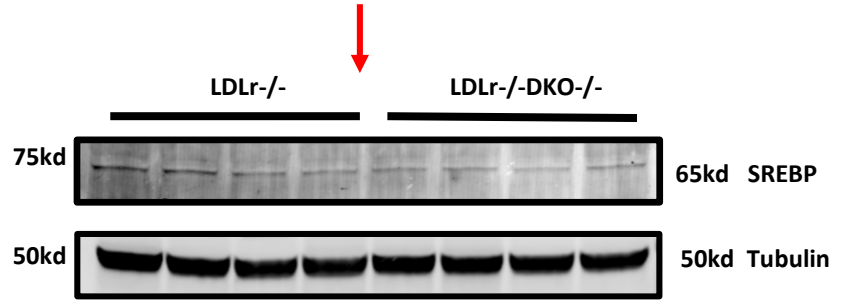

Figure 5D

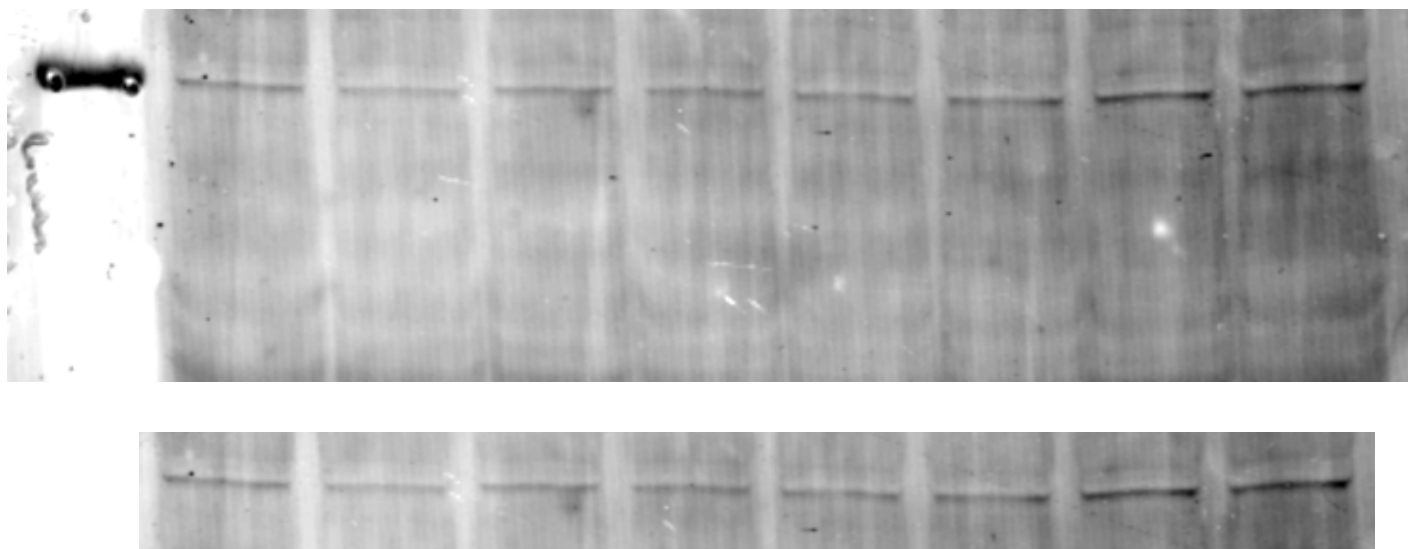

Supplement: 42003_2023_4643_MOESM6_ESM.pdf [file 42003_2023_4643_MOESM6_ESM.pdf]
