# Supplementary material for: DIAPH1 mediates progression of atherosclerosis and regulates hepatic lipid metabolism in mice
Source: PubMed Central journal article supplement (PMC10023694; doi:10.1038/s42003-023-04643-2), 2023-03-17

**Figure 8C**

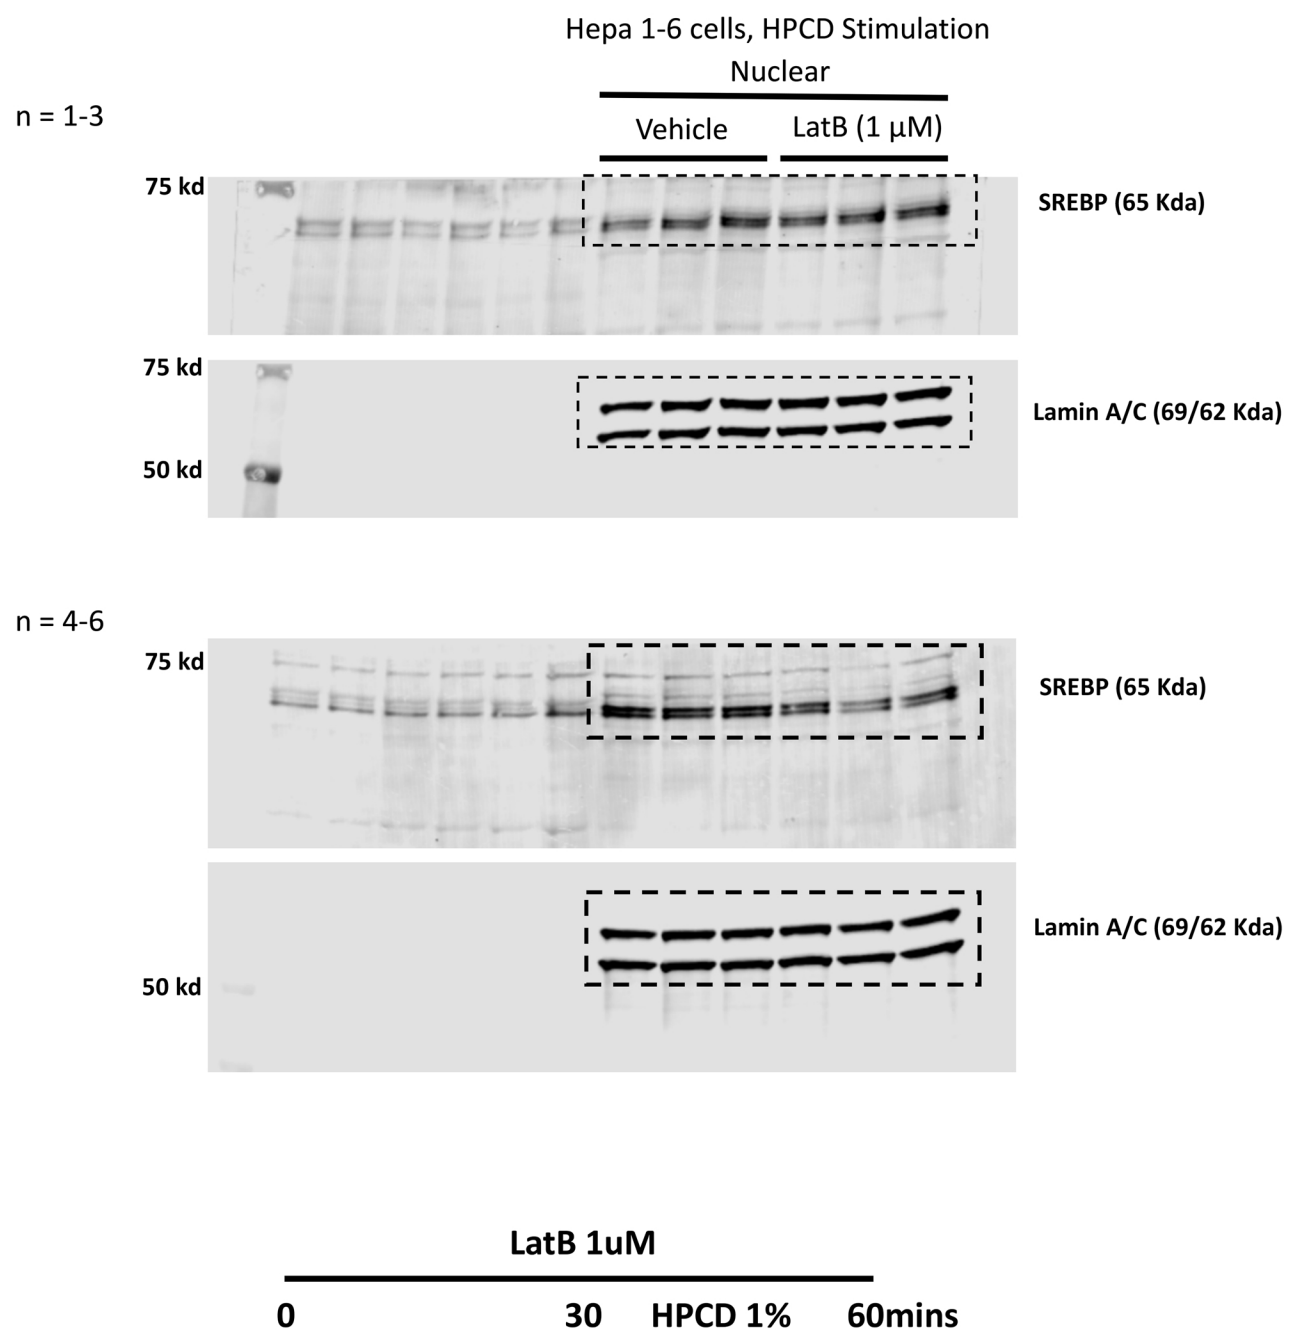

Supplement: 42003_2023_4643_MOESM7_ESM.pdf [file 42003_2023_4643_MOESM7_ESM.pdf]
